# Supplementary material
Source: PubMed Central journal article supplement (PMC3891635)
Supplement: mge-3-e27755-s01.pdf [file mge-3-e27755-s01.pdf]

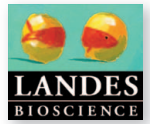

## **Supplemental Material to:**

**Justin T Roberts, Elvera A Cooper, Connor J Favreau,  
Jacob S Howell, Lee G Lane, James E Mills,  
Derrick C Newman, Tabitha J Perry, Meaghan E Russell,  
Brittany M Wallace, and Glen M Borchert**

**Continuing analysis of microRNA origins:  
Formation from transposable element insertions  
and noncoding RNA mutations**

**Mobile Genetic Elements 2013; 3(6)  
<http://dx.doi.org/10.4161/mge.27755>**

**<http://www.landesbioscience.com/journals/mge/article/27755/>**

A

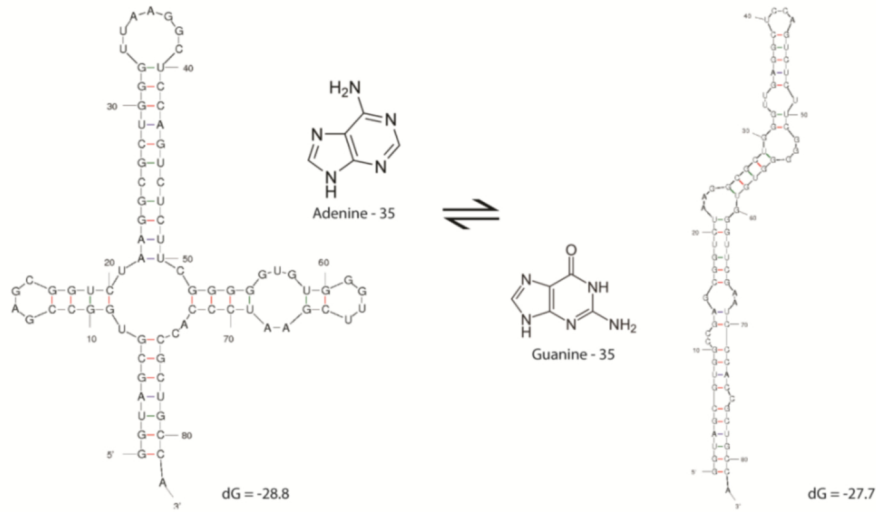

B

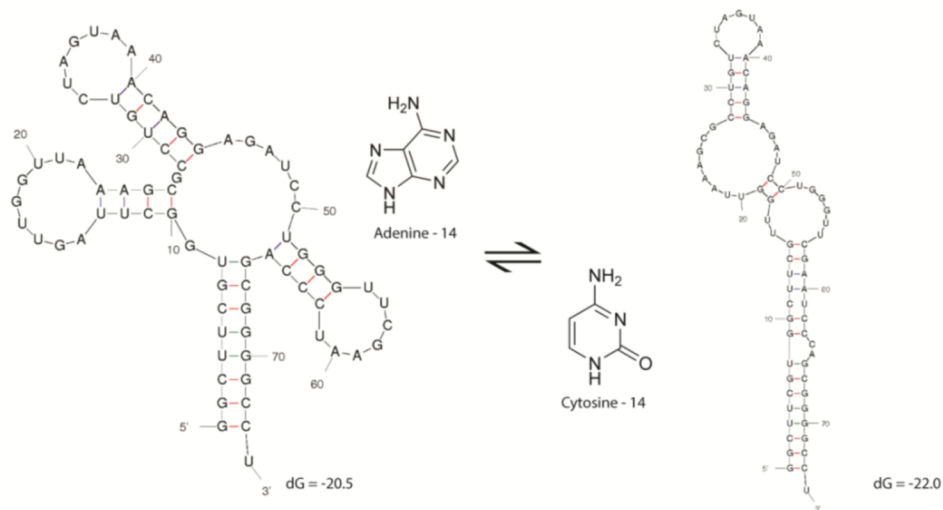

C

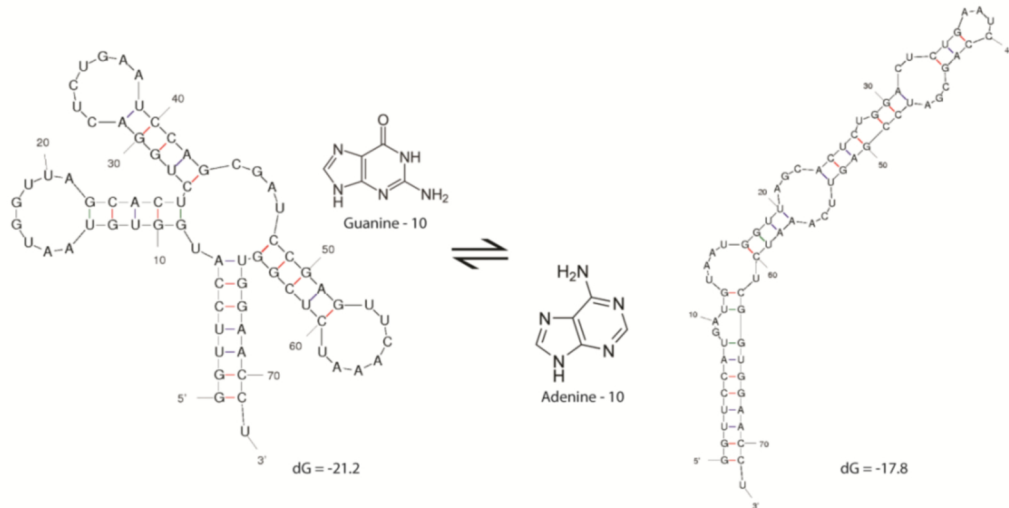

**Supplemental Figure 1.** Formation of a miR through tRNA mutation. Structural diagrams illustrating the potential effects of a single point mutation to tRNA secondary structure. The most thermodynamically stable conformations of two tRNA sequences are shown. The two sequences resulting in the distinct structural conformations are identical except the sequence on the right has been altered at a single position as indicated. Secondary structures and thermodynamic stabilities were computed using Mfold.35 (A) *Danio rerio* tRNA<sup>Leu</sup> (AAG) located on chromosome 4 at 30349077-30348996 bp (B) *Equus caballus* tRNA<sup>Thr</sup> (AGT) located on chromosome 20 at 26012749-26012822 bp (C) *Felis catus* tRNA<sup>Gln</sup> (CTG) located on scaffold 151171 at 153624-153695 bp.

**Supplemental Table 1.** Following the construction of databases containing all currently annotated pre-miRs ([www.mirbase.org](http://www.mirbase.org)) and miR genomic loci (pre-miR + 500 bp both 5' and 3'), we screened all database sequences against the publically available RFAM sequence database, the repetitive element repository (Replibase), and the tRNAscan-SE Genomic tRNA database. Significant alignments were strictly defined as  $\geq 80\%$  identity to at least 40bp or  $\geq 70\%$  identity to at least 50bp of an individual pre-miR. For clarity, only alignments to pre-miRs are shown. microRNA, miRBase identifier; Hit, aligning sequence; % ID, percent identity of alignment; bp, length of alignment; From(m), alignment start position in pre-miR; To(m), alignment end in pre-miR.

| microRNA                                                      | Hit                                            | %ID   | bp | From(m) | To (m) |
|---------------------------------------------------------------|------------------------------------------------|-------|----|---------|--------|
| tur-mir-1_mi0019395_Tetranychus_urticae_miR-1_stem-loop       | piggyBac-1_DW#piggyBac#Drosophila              | 74.55 | 55 | 13      | 62     |
| ccr-mir-101a_mi0023304_Cyprinus                               | ATCOPIA44_l#Copia#Arabidopsis                  | 77.36 | 53 | 19      | 71     |
| tgu-mir-10a_mi0016248_Taeniopygia_guttata_miR-10a_stem-loop   | Gorilla_gorilla_gorilla_chr14.trna19-TyrGTA    | 76.92 | 52 | 28      | 79     |
| sha-mir-10b_mi0019626_Sarcophilus_harrisii_miR-10b_stem-loop  | REP-6_CQ#Repetitive                            | 80    | 40 | 101     | 140    |
| ssp-MIR1128_mi0018189_Saccharum_ssp._miR1128_stem-loop        | STOWAWAY12_SB#DNA                              | 88.37 | 43 | 194     | 236    |
| tca-mir-1175_mi0016357_Tribolium_castaneum_miR-1175_stem-loop | Nimb-5_DR#Nimb#Danio                           | 80    | 40 | 16      | 54     |
| sma-mir-124_mi0021818_Schistosoma_mansoni_miR-124_stem-loop   | Gypsy-54_AA-l#Gypsy#Aedes                      | 80    | 40 | 30      | 67     |
| bta-mir-1246_mi0021112_Bos                                    | RF00004;U2;AAGW02026730.1/6992-7181            | 97.67 | 43 | 5       | 47     |
| ggo-mir-1249_mi0020794_Gorilla                                | LINE2B#Repetitive                              | 88.14 | 59 | 55      | 112    |
| mml-mir-1249_mi0020872_Macaca                                 | LINE2B#Repetitive                              | 88.14 | 59 | 55      | 112    |
| mmu-mir-1249_mi0004132_Mus                                    | LINE2B#Repetitive                              | 87.93 | 58 | 42      | 98     |
| rno-mir-1249_mi0015470_Rattus                                 | LINE2B#Repetitive                              | 89.23 | 65 | 53      | 116    |
| ssc-mir-1249-1_mi0022158_Sus_scrofa_miR-1249-1_stem-loop      | L2B#CR1#Eutheria                               | 85.71 | 49 | 35      | 82     |
| ssc-mir-1249-2_mi0022159_Sus_scrofa_miR-1249-2_stem-loop      | L2B#CR1#Eutheria                               | 85.71 | 49 | 35      | 82     |
| ptr-mir-1252_mi0020586_Pan_troglodytes_miR-1252_stem-loop     | ERV1-3-l_DR#ERV1#Danio                         | 80    | 40 | 39      | 78     |
| hsa-mir-1254-2_mi0016747_Homo_sapiens_miR-1254-2_stem-loop    | RF00017;Metazoa_SRP;ABGA01280524.1/775-1060    | 93.02 | 43 | 21      | 63     |
| mml-mir-1255b [Source:miRBase;Acc:MI0020890] mml-mir-1255b    | RF00100;7SK;CAEC01582869.1/1772-2107           | 77.32 | 97 | 563     | 659    |
| bta-mir-1260b_mi0021113_Bos                                   | Ag-Jock-1#Jockey#Anopheles                     | 78    | 50 | 30      | 79     |
| ggo-mir-1260b_mi0020787_Gorilla                               | Gypsy-50_GA-LTR#Gypsy#Gasterosteus             | 77.27 | 66 | 43      | 107    |
| mml-mir-1260b_mi0020867_Macaca                                | Gypsy-50_GA-LTR#Gypsy#Gasterosteus             | 77.27 | 66 | 43      | 107    |
| ppy-mir-1260b_mi0020918_Pongo                                 | Gypsy-50_GA-LTR#Gypsy#Gasterosteus             | 75.76 | 66 | 43      | 107    |
| ptr-mir-1260b_mi0020613_Pan_troglodytes_miR-1260b_stem-loop   | Gypsy-50_GA-LTR#Gypsy#Gasterosteus             | 77.27 | 66 | 43      | 107    |
| ggo-mir-1264_mi0020834_Gorilla                                | L2A#CR1#Eutheria                               | 86.67 | 45 | 16      | 60     |
| mmu-mir-1264_mi0004130_Mus                                    | MIR2#Repetitive                                | 84    | 50 | 1       | 50     |
| hsa-mir-1268b_mi0016748_Homo_sapiens_miR-1268b_stem-loop      | RF00017;Metazoa_SRP;ABGA01378105.1/11343-11069 | 86.36 | 44 | 7       | 50     |
| hsa-mir-1269b_mi0016888_Homo_sapiens_miR-1269b_stem-loop      | MLT2B2#Inspersed                               | 81.97 | 61 | 11      | 71     |
| ggo-mir-127_mi0020641_Gorilla                                 | RF00017;Metazoa_SRP;AGCE01083710.1/22311-22608 | 81.25 | 48 | 23      | 70     |
| cgr-mir-1271_mi0020389_Cricetulus                             | MIR2#Repetitive                                | 80.77 | 52 | 3       | 54     |
| ggo-mir-1271_mi0020739_Gorilla                                | L2A#CR1#Eutheria                               | 85.37 | 41 | 45      | 85     |
| mml-mir-1271_mi0020863_Macaca                                 | MIR2#Repetitive                                | 81.67 | 60 | 1       | 60     |
| ssc-mir-1271_mi0015922_Sus_scrofa_miR-1271_stem-loop          | RF00409;SNORA7;AAPN01158427.1/24823-24668      | 87.5  | 40 | 1       | 40     |
| ggo-mir-1273c_mi0020837_Gorilla                               | RF00017;Metazoa_SRP;ABGA01071783.1/9-313       | 94.23 | 52 | 43      | 94     |

|                                                                |                                                |       |     |     |     |
|----------------------------------------------------------------|------------------------------------------------|-------|-----|-----|-----|
| hsa-mir-1273e_mi0016059_Homo_sapiens_miR-1273e_stem-loop       | RF00017;Metazoa_SRP;AACZ03107475.1/16257-16006 | 92.39 | 92  | 1   | 92  |
| ppy-mir-1273e_mi0020933_Pongo                                  | RF00017;Metazoa_SRP;CABD02172295.1/545-844     | 90.91 | 77  | 9   | 85  |
| hsa-mir-1273f_mi0018002_Homo_sapiens_miR-1273f_stem-loop       | RF00017;Metazoa_SRP;ADFV01003263.1/9396-9696   | 90.48 | 63  | 3   | 65  |
| hsa-mir-1273g_mi0018003_Homo_sapiens_miR-1273g_stem-loop       | RF00017;Metazoa_SRP;CABD02393273.1/1879-1583   | 88    | 100 | 1   | 100 |
| bta-mir-1277_mi0021114_Bos                                     | CR1-18_HM#CR1#Hydra                            | 82.14 | 56  | 10  | 65  |
| ggo-mir-1277_mi0020722_Gorilla                                 | CR1-18_HM#CR1#Hydra                            | 83.93 | 56  | 34  | 89  |
| mml-mir-1277_mi0020865_Macaca                                  | CR1-18_HM#CR1#Hydra                            | 83.93 | 56  | 34  | 89  |
| sha-mir-128_mi0019625_Sarcophilus_harrisii_miR-128_stem-loop   | DNA-TTAA-4_BF                                  | 80    | 45  | 14  | 56  |
| cgr-mir-1285_mi0020390_Cricetulus                              | RF00017;Metazoa_SRP;AFTD01108184.1/46710-46973 | 100   | 90  | 1   | 90  |
| ggo-mir-1291_mi0020755_Gorilla                                 | RF00410;SNORA2;CAECO1039678.1/1523-1387        | 96.77 | 93  | 20  | 112 |
| tur-mir-12b_mi0019367_Tetranychus_urticae_miR-12b_stem-loop    | Gypsy-82_MLP-l#Gypsy#Melampsora                | 73.58 | 53  | 31  | 83  |
| mml-mir-1304_mi0020887_Macaca                                  | RF00017;Metazoa_SRP;ABGA01128838.1/51-317      | 88.1  | 42  | 50  | 91  |
| sha-mir-130a_mi0019659_Sarcophilus_harrisii_miR-130a_stem-loop | RF00409;SNORA7;AAPN01024517.1/4965-5091        | 81.25 | 48  | 10  | 56  |
| sha-mir-130b_mi0019642_Sarcophilus_harrisii_miR-130b_stem-loop | L1-2A_Cpo#L1#Cavia                             | 77.78 | 54  | 1   | 51  |
| mmu-mir-130c_mi0021917_Mus                                     | Bos_taurus_chr18.trna3718-TrpCCA               | 80.95 | 42  | 25  | 64  |
| han-MIR1310_mi0022262_Helianthus                               | LSU-rRNA_Ath                                   | 93.59 | 78  | 1   | 78  |
| pde-MIR1310_mi0022111_Pinus                                    | LSU-rRNA_Ath                                   | 94.64 | 56  | 1   | 56  |
| osa-MIR1319b_mi0019843_Oryza                                   | RF01705;Flavo-1;AM398681.1/1248668-1248760     | 78    | 50  | 33  | 81  |
| pma-mir-133a_mi0017069_Petromyzon                              | RF00005;tRNA;CP002304.1/1447926-1447854        | 81.4  | 43  | 39  | 77  |
| sha-mir-133a_mi0019610_Sarcophilus_harrisii_miR-133a_stem-loop | CACTA-1_AA#EnSpm#Aedes                         | 80    | 40  | 4   | 43  |
| ENSG00000251862 microRNA_1343_human                            | RF00222;IRES_Bag1;ABRQ01145200.1/2918-2549     | 80.85 | 47  | 558 | 604 |
| cgr-mir-143_mi0020405_Cricetulus                               | RF00017;Metazoa_SRP;ABSL01251718.1/4-281       | 82.5  | 40  | 2   | 40  |
| tgu-mir-1460_mi0022175-Taeniopygia_guttata_miR-1460_stem-loop  | Tx1-8_SK#Tx1#Saccoglossus                      | 81.4  | 43  | 3   | 42  |
| gma-MIR1507c_mi0017854_Glycine                                 | Tx1-1_ACar#Tx1#Anolis                          | 82.93 | 41  | 28  | 67  |
| cgr-mir-151_mi0020412_Cricetulus                               | MIR2#Repetitive                                | 80.43 | 46  | 29  | 73  |
| csi-MIR1515_mi0016731_Citrus                                   | hAT-11N_VV#hAT#Vitis                           | 72.06 | 68  | 64  | 126 |
| ggo-mir-151a_mi0020654_Gorilla                                 | MIR2#Repetitive                                | 80.85 | 47  | 53  | 98  |
| hsa-mir-151b_mi0003772_Homo_sapiens_miR-151b_stem-loop         | LINE2B#Repetitive                              | 87.5  | 40  | 40  | 79  |
| ppy-mir-151b_mi0020942_Pongo                                   | LINE2B#Repetitive                              | 85    | 40  | 49  | 88  |
| gma-MIR1520n_mi0016536_Glycine                                 | BLOODI#LTR                                     | 81.4  | 43  | 26  | 68  |
| sha-mir-1546_mi0019622_Sarcophilus_harrisii_miR-1546_stem-loop | LINE1J_MT#L1#Medicago                          | 80.49 | 41  | 23  | 62  |
| ssp-MIR156_mi0018191_Saccharum_ssp._miR156_stem-loop           | TE7-1_FV#Transposable                          | 78.95 | 57  | 113 | 169 |
| tae-MIR156_mi0016450_Triticum_aestivum_miR156_stem-loop        | LTR9B_EC#Endogenous                            | 87.5  | 40  | 3   | 42  |
| han-MIR156a_mi0022228_Helianthus                               | SZ-60#LTR                                      | 82.5  | 40  | 60  | 98  |
| gma-MIR156ab_mi0021681_Glycine                                 | Penelope-4_NV#Penelope#Nematostella            | 82.5  | 40  | 133 | 171 |
| cme-MIR156b_mi0023235_Cucumis                                  | ERV2-1N-EC_I#ERV2#Equus                        | 83.33 | 48  | 43  | 90  |
| tcc-MIR156b_mi0017454_Theobroma_cacao_miR156b_stem-loop        | hAT-N36_DR#hAT#Danio                           | 83.67 | 49  | 81  | 129 |
| vun-MIR156b_mi0019566_Vigna_unguiculata_miR156b_stem-loop      | ATHILA5_LTR#Gypsy#Arabidopsis                  | 80.95 | 42  | 25  | 66  |
| cca-MIR156c_mi0021066_Cynara                                   | RF00004;U2;AAGW02062380.1/41541-41689          | 82.5  | 40  | 55  | 93  |
| tcc-MIR156c_mi0017455_Theobroma_cacao_miR156c_stem-loop        | TUBE2#SINE2/tRNA#Tupaia                        | 80    | 40  | 1   | 40  |
| aly-MIR156d_mi0014505_Arabidopsis                              | Harbinger-5_XT#Harbinger#Xenopus               | 76.79 | 56  | 56  | 110 |

|                                                               |                                               |       |     |     |     |
|---------------------------------------------------------------|-----------------------------------------------|-------|-----|-----|-----|
| aly-MIR156e_mi0014506_Arabidopsis                             | TUB1#SINE#Tupaia                              | 80.95 | 42  | 106 | 147 |
| cme-MIR156e_mi0023260_Cucumis                                 | L1-27_ACar#L1#Anolis                          | 79.25 | 53  | 50  | 99  |
| tcc-MIR156e_mi0017457_Theobroma_cacao_miR156e_stem-loop       | SHACOP14_I_MT#Copia#Medicago                  | 80.95 | 42  | 65  | 106 |
| aly-MIR156f_mi0014507_Arabidopsis                             | RF00100;7SK;AANN01807336.1/5474-5837          | 75.34 | 73  | 141 | 211 |
| nta-MIR156g_mi0021325_Nicotiana                               | Gypsy-15_GA-#Gypsy#Gasterosteus               | 81.25 | 48  | 34  | 81  |
| cme-MIR156h_mi0023262_Cucumis                                 | Ginger1-2_AP#Ginger1#Acyrtosiphon             | 80.49 | 41  | 60  | 98  |
| mtr-MIR156j_mi0018375_Medicago                                | RF00100;7SK;AFTD01089417.1/20587-20303        | 80.95 | 42  | 8   | 46  |
| mdm-MIR156l_mi0022982_Malus                                   | HERVFH19I#gag#Homo                            | 84.62 | 52  | 4   | 55  |
| ptc-MIR156l_mi0022040_Populus                                 | RF00004;U2;AACN010449088.1/1009-1184          | 80    | 40  | 54  | 93  |
| aly-MIR157c_mi0014512_Arabidopsis                             | RF00004;U2;ACTA01169195.1/11731-11940         | 88.64 | 44  | 149 | 192 |
| bdi-MIR159_mi0018117_Brachypodium                             | LTR18F_ML#ERV1#Myotis                         | 90.48 | 42  | 193 | 233 |
| aly-MIR159a_mi0014515_Arabidopsis                             | ATHAT9#hAT#Arabidopsis                        | 82.5  | 40  | 87  | 124 |
| cme-MIR159a_mi0023264_Cucumis                                 | CR1-78_HM#CR1#Hydra                           | 85    | 40  | 78  | 115 |
| aly-MIR159c_mi0014517_Arabidopsis                             | PIF_Harbinger-1_Mlaricis#Harbinger#Melampsora | 90.7  | 43  | 152 | 194 |
| aly-MIR160a_mi0014521_Arabidopsis                             | CR1-18_HM#CR1#Hydra                           | 87.5  | 40  | 5   | 43  |
| tgu-mir-1641_mi0022177-Taeniopygia_guttata_miR-1641_stem-loop | Eulor5A#Transposable                          | 86    | 50  | 41  | 90  |
| bdi-MIR164a_mi0018118_Brachypodium                            | SSU-rRNA_Giardia                              | 82.98 | 47  | 74  | 120 |
| aly-MIR164b_mi0014528_Arabidopsis                             | GYPY68-I_AG#Gypsy#Anopheles                   | 72.31 | 65  | 39  | 103 |
| bdi-MIR164f_mi0018216_Brachypodium                            | SSU-rRNA_Giardia                              | 82.98 | 47  | 55  | 101 |
| mdm-MIR164f_mi0023016_Malus                                   | TE-2_XT#Transposable                          | 80.49 | 41  | 54  | 94  |
| hpe-MIR166a_mi0022244_Helianthus                              | TEC2#Mariner/Tc1#Moneuplotes                  | 80    | 40  | 92  | 131 |
| mdm-MIR166a_mi0023017_Malus                                   | Z-REP#Satellite#Gallus                        | 81.82 | 44  | 66  | 109 |
| ssl-MIR166a_mi0019343_Salvia_sclarea_miR166a_stem-loop        | Gypsy-120_GM-LTR#Gypsy#Glycine                | 80    | 40  | 35  | 73  |
| tcc-MIR166b_mi0017468_Theobroma_cacao_miR166b_stem-loop       | Helitron-N2_PTr#Helitron#Populus              | 80    | 40  | 56  | 95  |
| tcc-MIR166d_mi0017470_Theobroma_cacao_miR166d_stem-loop       | Crack-7_HM#Crack#Hydra                        | 82.5  | 40  | 15  | 54  |
| aly-MIR166e_mi0014536_Arabidopsis                             | Gypsy1-I_Dmoj#Gypsy#Drosophila                | 82    | 50  | 66  | 113 |
| bna-MIR166e_mi0020273_Brassica                                | DIRS-1_SP#DIRS#Strongylocentrotus             | 82.93 | 41  | 37  | 77  |
| cme-MIR166e_mi0023283_Cucumis                                 | L1-57_ACar#L1#Anolis                          | 77.05 | 61  | 86  | 145 |
| nta-MIR166e_mi0021343_Nicotiana                               | CR1-8_HM#CR1#Hydra                            | 73.08 | 52  | 69  | 120 |
| aly-MIR166f_mi0014537_Arabidopsis                             | gambiae                                       | 80.49 | 41  | 43  | 78  |
| bna-MIR166f_mi0020272_Brassica                                | RF00100;7SK;ABRO01062249.1/286-10             | 77.61 | 67  | 30  | 94  |
| mdm-MIR166g_mi0023023_Malus                                   | hAT-2_DR#hAT#Danio                            | 83.67 | 49  | 64  | 111 |
| cme-MIR166h_mi0023212_Cucumis                                 | RF00028;Intron_gpl;AY756924.1/4-403           | 82.22 | 45  | 31  | 75  |
| nta-MIR166h_mi0021346_Nicotiana                               | CR1-40_HM#CR1#Hydra                           | 75    | 56  | 55  | 110 |
| gma-MIR166i_mi0018660_Glycine                                 | Gypsy-36_Mad-#Gypsy#Malus                     | 76.67 | 60  | 19  | 78  |
| gma-MIR166q_mi0021693_Glycine                                 | ATHPOGON3#Mariner/Tc1#Arabidopsis             | 82.22 | 45  | 72  | 116 |
| gma-MIR166r_mi0021694_Glycine                                 | hAT-N12_AP#hAT#Acyrtosiphon                   | 82.5  | 40  | 80  | 119 |
| cca-MIR167_mi0021070_Cynara                                   | Novosib-6_CR#Novosib#Chlamydomonas            | 72.65 | 117 | 48  | 162 |
| nta-MIR167a_mi0021347_Nicotiana                               | RF00406;SNORA42;ABRO01037156.1/1418-1286      | 82.5  | 40  | 189 | 228 |
| bdi-MIR167b_mi0018091_Brachypodium                            | Canis_familiaris_chr36.trna233-LysCTT         | 82.93 | 41  | 114 | 153 |
| mtr-MIR167b_mi0019092_Medicago                                | DNA8-50_AP#DNA                                | 72.97 | 74  | 70  | 141 |

|                                                         |                                              |       |    |     |     |
|---------------------------------------------------------|----------------------------------------------|-------|----|-----|-----|
| ssp-MIR167b_mi0018193_Saccharum_ssp._miR167b_stem-loop  | TONT2-I_PV#Copia#Phaseolus                   | 78    | 50 | 22  | 70  |
| cme-MIR167c_mi0023280_Cucumis                           | RF02194;HPnc0260;AACY020385536.1/145-298     | 85    | 40 | 23  | 61  |
| csi-MIR167c_mi0016696_Citrus                            | EnSpm-3_VV#EnSpm#Vitis                       | 76.27 | 59 | 48  | 103 |
| tcc-MIR167c_mi0017473_Theobroma_cacao_miR167c_stem-loop | ERV54-EC_I#ERV1#Equus                        | 82.5  | 40 | 33  | 71  |
| aly-MIR167d_mi0014542_Arabidopsis                       | CR1-18_HM#CR1#Hydra                          | 72.83 | 92 | 181 | 268 |
| cme-MIR167d_mi0023267_Cucumis                           | CR1-38_HM#CR1#Hydra                          | 81.63 | 49 | 56  | 104 |
| cme-MIR167e_mi0023281_Cucumis                           | LIN7_SM#Non-LTR                              | 75.76 | 66 | 47  | 106 |
| mdm-MIR167f_mi0023031_Malus                             | TE2-1_CR#Transposable                        | 78    | 50 | 192 | 238 |
| bdi-MIR168_mi0018098_Brachypodium                       | ERIKA1_TM_LTR#target                         | 73.44 | 64 | 8   | 71  |
| cme-MIR168_mi0018177_Cucumis                            | DIRS-9A_XT#DIRS#Xenopus                      | 74.63 | 67 | 72  | 131 |
| nta-MIR168a_mi0021352_Nicotiana                         | CR1-3_AG#AP                                  | 80    | 40 | 108 | 145 |
| nta-MIR168d_mi0021355_Nicotiana                         | HAL1#HAL1#Eutheria                           | 71.7  | 53 | 124 | 174 |
| nta-MIR168e_mi0021356_Nicotiana                         | SINEC2A1_CF#SINE#Canis                       | 80    | 40 | 236 | 275 |
| far-MIR169_mi0016612_Festuca                            | RF00100;7SK;AANN01813378.1/2781-2455         | 75.76 | 66 | 25  | 85  |
| aly-MIR169a_mi0014545_Arabidopsis                       | Gypsy-40_Mad-I#Gypsy#Malus                   | 76.54 | 81 | 129 | 208 |
| tcc-MIR169b_mi0017476_Theobroma_cacao_miR169b_stem-loop | L1_AC_16#L2#Anolis                           | 80.49 | 41 | 97  | 137 |
| aly-MIR169c_mi0014547_Arabidopsis                       | RF00017;Metazoa_SRP;ACFV01110995.1/133-479   | 82.5  | 40 | 114 | 153 |
| gma-MIR169f_mi0017836_Glycine                           | RF01853;mtDNA_ssA;ABGA01016443.1/21420-21322 | 93.48 | 46 | 76  | 120 |
| tcc-MIR169f_mi0017480_Theobroma_cacao_miR169f_stem-loop | EnSpm-2_ADi#EnSpm#Acropora                   | 80.95 | 42 | 42  | 83  |
| gma-MIR169g_mi0017837_Glycine                           | RF00028;Intron_gpl;AY150342.1/5-318          | 82.61 | 46 | 35  | 79  |
| cme-MIR169h_mi0023218_Cucumis                           | L1-4_DR#L1                                   | 82.93 | 41 | 43  | 82  |
| tcc-MIR169k_mi0017485_Theobroma_cacao_miR169k_stem-loop | DM297_I#Gypsy#Drosophila                     | 80    | 40 | 69  | 107 |
| gma-MIR169m_mi0018665_Glycine                           | Gypsy13-VV_I#Gypsy#Vitis                     | 80.95 | 42 | 45  | 86  |
| tcc-MIR169m_mi0017487_Theobroma_cacao_miR169m_stem-loop | MuDi_MT#MuDR#Medicago                        | 80.95 | 42 | 62  | 101 |
| ccr-mir-16b_mi0023340_Cyprinus                          | RF00026;U6;AGTP01002018.1/29854-29748        | 82.61 | 46 | 37  | 78  |
| ccr-mir-16c_mi0023341_Cyprinus                          | RF00026;U6;AGTP01002018.1/29854-29748        | 80.43 | 46 | 37  | 78  |
| nta-MIR171c_mi0021378_Nicotiana                         | RF00100;7SK;AFSB01081499.1/35813-35518       | 80.49 | 41 | 25  | 62  |
| gma-MIR171i_mi0017907_Glycine                           | Gypsy-28_GA-I#Gypsy#Gasterosteus             | 82.93 | 41 | 88  | 127 |
| aaU-MIR172_mi0018980_Acacia                             | LTR18F_ML#ERV1#Myotis                        | 87.8  | 41 | 75  | 113 |
| ata-MIR172_mi0016462_Aegilops                           | L1-55_XT#Tx1#Xenopus                         | 100   | 42 | 97  | 138 |
| cme-MIR172a_mi0023285_Cucumis                           | TDD4#DNA                                     | 80.49 | 41 | 54  | 94  |
| nta-MIR172b_mi0021380_Nicotiana                         | RF00012;U3;BACK01028739.1/15209-15418        | 80.95 | 42 | 3   | 41  |
| aly-MIR172c_mi0014565_Arabidopsis                       | L1-38_XT#L1#Xenopus                          | 74.55 | 55 | 76  | 130 |
| cme-MIR172d_mi0023231_Cucumis                           | L1-37_XT#L1#Xenopus                          | 78.85 | 52 | 50  | 101 |
| tcc-MIR172d_mi0017500_Theobroma_cacao_miR172d_stem-loop | P-11_HM#P#Hydra                              | 82    | 50 | 29  | 76  |
| nta-MIR172e_mi0021383_Nicotiana                         | RF00026;U6;AAKN02010750.1/6739-6845          | 86.96 | 46 | 152 | 197 |
| tcc-MIR172e_mi0017501_Theobroma_cacao_miR172e_stem-loop | L1-37_ACar#L1#Anolis                         | 87.5  | 40 | 79  | 116 |
| cme-MIR172f_mi0023203_Cucumis                           | RF00017;Metazoa_SRP;ABSL01170666.1/396-82    | 74.68 | 79 | 60  | 136 |
| nta-MIR172f_mi0021384_Nicotiana                         | RF00026;U6;AAKN02010750.1/6739-6845          | 86.96 | 46 | 67  | 112 |
| nta-MIR172g_mi0021385_Nicotiana                         | RF00012;U3;BACK01028739.1/15209-15418        | 80.95 | 42 | 3   | 41  |
| gma-MIR172i_mi0018670_Glycine                           | RF00001;5S_rRNA;CABZ01002141.1/31112-30994   | 83.33 | 42 | 57  | 97  |

|                                                                    |                                                       |       |    |     |     |
|--------------------------------------------------------------------|-------------------------------------------------------|-------|----|-----|-----|
| nta-MIR172j_mi0021388_Nicotiana                                    | LIN7_SM#Non-LTR                                       | 78.85 | 52 | 107 | 157 |
| bfl-mir-182c_mi0017661_Branchiostoma                               | RF00001;5S_rRNA;AFSP01032747.1/1431-1318              | 75    | 60 | 37  | 95  |
| cgr-mir-1839_mi0020426_Cricetulus                                  | RF00426;SCARNA15;ABDC01642996.1/97-188                | 98.57 | 70 | 1   | 70  |
| rno-mir-1839_mi0021533_Rattus                                      | RF00426;SCARNA15;ABDC01642996.1/97-188                | 100   | 64 | 1   | 64  |
| cgr-mir-1843_mi0020428_Cricetulus                                  | RF00565;SCARNA3;AFTD01003630.1/13914-14052            | 100   | 72 | 1   | 72  |
| rno-mir-1843_mi0021535_Rattus                                      | RF00565;SCARNA3;AFTD01003630.1/13914-14052            | 94.52 | 73 | 5   | 77  |
| mmu-mir-1843a_mi0004155_Mus                                        | RF00565;SCARNA3;AFTD01003630.1/13914-14052            | 93.75 | 64 | 1   | 64  |
| mmu-mir-1843b_mi0016971_Mus                                        | RF00565;SCARNA3;AAHX01076216.1/3447-3308              | 98.39 | 62 | 2   | 63  |
| dre-mir-187-2_mi0019583_Danio                                      | RF00029;Intron_gpII;EU074107.1/826-898                | 80.49 | 41 | 23  | 62  |
| sha-mir-190_mi0019595_Sarcophilus_harrisii_miR-190_stem-loop       | EnSpm3_SB#EnSpm#Sorghum                               | 81.63 | 49 | 29  | 75  |
| tur-mir-190_mi0019389_Tetranychus_urticae_miR-190_stem-loop        | BEL-22_DAn-I#BEL#Drosophila                           | 85    | 40 | 7   | 44  |
| cgr-mir-1903_mi0020435_Cricetulus                                  | RF00005;tRNA;AAHX01000286.1/15293-15364               | 91.67 | 48 | 17  | 64  |
| cgr-mir-190a_mi0020434_Cricetulus                                  | MuDR-5_VV#MuDR#Vitis                                  | 80    | 40 | 16  | 55  |
| ssc-mir-190a_mi0022136_Sus_scrofa_miR-190a_stem-loop               | EnSpm3_SB#EnSpm#Sorghum                               | 81.63 | 49 | 9   | 55  |
| tgu-mir-192_mi0016247-Taeniopygia_guttata_miR-192_stem-loop        | CR1-8_DR#CR1#Danio                                    | 82.93 | 41 | 46  | 84  |
| cgr-mir-1949_mi0020441_Cricetulus                                  | RF00090;SNORA74;AEYP01016686.1/19606-19466            | 94.81 | 77 | 2   | 77  |
| rno-mir-1949_mi0015441_Rattus                                      | RF00090;SNORA74;AEYP01016686.1/19606-19466            | 95.29 | 85 | 1   | 85  |
| mmu-mir-1957b_mi0021929_Mus                                        | RF00005;tRNA;AC134578.5/115049-115119                 | 78.57 | 56 | 36  | 91  |
| ola-mir-199a-3_mi0019485_Oryzias                                   | RF00100;7SK;ACBE01350530.1/887-1205                   | 78.43 | 51 | 3   | 52  |
| pma-mir-19c_mi0017021_Petromyzon                                   | RF00169;Bacteria_small_SRP;CP002456.1/264251-264154   | 76    | 50 | 18  | 66  |
| sko-mir-2007_mi0017559_Saccoglossus_kowalevskii_miR-2007_stem-loop | Copia-7_DPu-I#Copia#Daphnia                           | 81.4  | 43 | 48  | 89  |
| sha-mir-202_mi0019606_Sarcophilus_harrisii_miR-202_stem-loop       | DNA9-6_STU#DNA                                        | 85.37 | 41 | 101 | 140 |
| aly-MIR2111b_mi0014631_Arabidopsis                                 | UCON6#Transposable                                    | 76.92 | 52 | 65  | 116 |
| rno-mir-218b_mi0015428_Rattus                                      | L1C_Mim#L1#Microcebus                                 | 80    | 40 | 58  | 97  |
| dre-mir-2190-2_mi0019586_Danio                                     | Atlantys-2-I_OS#Gypsy#Oryza                           | 75.93 | 54 | 17  | 68  |
| dre-mir-2190-3_mi0019587_Danio                                     | Atlantys-2-I_OS#Gypsy#Oryza                           | 75.93 | 54 | 17  | 68  |
| dre-mir-2190-4_mi0019588_Danio                                     | Atlantys-2-I_OS#Gypsy#Oryza                           | 75.93 | 54 | 17  | 68  |
| sha-mir-221_mi0019624_Sarcophilus_harrisii_miR-221_stem-loop       | Helitron-1B_SBi#Helitron#Sorghum                      | 80.95 | 42 | 76  | 116 |
| bta-mir-2284aa-2_mi0022326_Bos                                     | RF01417;RSV_RNA;AFTD01149166.1/22000-22291            | 80    | 40 | 28  | 67  |
| bta-mir-2284aa-3_mi0022327_Bos                                     | TguERVK7_I#ERV2#Estrilidae                            | 82.5  | 40 | 3   | 42  |
| bta-mir-2284z-2_mi0022351_Bos                                      | GYPSY2-LTR_MT#Gypsy#Medicago                          | 80    | 45 | 7   | 49  |
| bta-mir-2284z-5_mi0022338_Bos                                      | partial_XPA3245.xy2                                   | 82.93 | 41 | 28  | 67  |
| bta-mir-2285m-4_mi0022306_Bos                                      | RF00100;7SK;AFSB01230228.1/12189-11874                | 82.5  | 40 | 9   | 46  |
| bta-mir-2285o-2_mi0022271_Bos                                      | Transib3_DP#Transib#Drosophila                        | 73.08 | 52 | 17  | 68  |
| ssc-mir-2320_mi0017997_Sus_scrofa_miR-2320_stem-loop               | ERV1-6-EC_I#ERV1#Equus                                | 86.36 | 66 | 5   | 70  |
| cgr-mir-23a_mi0020466_Cricetulus                                   | Hydrogenivirga_sp_128-5-R1-1_NZ_ABHJ01000003.trna4-Se | 72.73 | 55 | 20  | 69  |
| ssc-mir-2411_mi0022164_Sus_scrofa_miR-2411_stem-loop               | RF00418;SNORA58;AAGU03056415.1/38747-38883            | 92.42 | 66 | 8   | 73  |
| sha-mir-24-2_mi0019613_Sarcophilus_harrisii_miR-24-2_stem-loop     | RF01296;snoU85;AFSB01239366.1/14397-14713             | 77.14 | 70 | 36  | 102 |
| cgr-mir-2424_mi0020469_Cricetulus                                  | RF01296;snoU85;AFTD01048412.1/103189-103510           | 100   | 65 | 1   | 65  |
| ssc-mir-2483_mi0022167_Sus_scrofa_miR-2483_stem-loop               | X24_DNA#DNA                                           | 76.27 | 59 | 19  | 76  |
| tgu-mir-25_mi0016246-Taeniopygia_guttata_miR-25_stem-loop          | GGLTR8A_LTR#ERV3#Gallus                               | 82.54 | 63 | 1   | 59  |

|                                                                      |                                                 |       |    |     |     |
|----------------------------------------------------------------------|-------------------------------------------------|-------|----|-----|-----|
| tca-mir-252a_mi0016350_Tribolium_castaneum_miR-252a_stem-loop        | piggyBac-N1_XT                                  | 80.36 | 56 | 8   | 58  |
| mtr-MIR2590g_mi0018412_Medicago                                      | RF00028;Intron_gpl;AM259639.1/1-295             | 85    | 40 | 29  | 67  |
| mtr-MIR2590h_mi0018435_Medicago                                      | RF00028;Intron_gpl;EF137598.1/3-497             | 76.47 | 51 | 117 | 167 |
| mtr-MIR2590i_mi0018436_Medicago                                      | RF00028;Intron_gpl;EF137598.1/3-497             | 73.24 | 71 | 133 | 202 |
| mtr-MIR2592ae_mi0018267_Medicago                                     | Copia-33_Mad-l#Copia#Malus                      | 80.43 | 46 | 58  | 99  |
| mtr-MIR2592ak_mi0018273_Medicago                                     | Copia-33_Mad-l#Copia#Malus                      | 80    | 40 | 74  | 111 |
| mtr-MIR2592am_mi0018275_Medicago                                     | DGI_SP#Repetitive                               | 80    | 50 | 155 | 204 |
| mtr-MIR2592ap_mi0018293_Medicago                                     | Copia-57_Mad-l#Copia#Malus                      | 74.6  | 63 | 292 | 351 |
| mtr-MIR2592aq_mi0018294_Medicago                                     | RF00028;Intron_gpl;EF631954.1/16-259            | 80    | 40 | 210 | 248 |
| mtr-MIR2592as_mi0018296_Medicago                                     | Copia-57_Mad-l#Copia#Malus                      | 86.67 | 45 | 341 | 385 |
| mtr-MIR2592ay_mi0018302_Medicago                                     | Copia-33_Mad-l#Copia#Malus                      | 82.5  | 40 | 359 | 396 |
| mtr-MIR2592bb_mi0018305_Medicago                                     | Copia-57_Mad-l#Copia#Malus                      | 74.6  | 63 | 295 | 354 |
| mtr-MIR2592bf_mi0018309_Medicago                                     | Copia-57_Mad-l#Copia#Malus                      | 76.19 | 63 | 327 | 386 |
| mtr-MIR2593e_mi0019693_Medicago                                      | RF01252;snR5;AACQ01000291.1/8159-8365           | 78    | 50 | 43  | 90  |
| mtr-MIR2606d_mi0018415_Medicago                                      | RF00020;U5;ACTA01124382.1/13936-14051           | 81.82 | 44 | 90  | 133 |
| mtr-MIR2619b_mi0019077_Medicago                                      | SHAMUDRA2_MT#MuDR#Medicago                      | 70.27 | 74 | 93  | 166 |
| mtr-MIR2629h_mi0018413_Medicago                                      | MuSHAN_MT#MuDR#Medicago                         | 89.09 | 55 | 19  | 73  |
| tur-mir-279_mi0019403_Tetranychus_urticae_miR-279_stem-loop          | RF00003;U1;CAEC01312745.1/486-326               | 78    | 50 | 1   | 47  |
| cgr-mir-28_mi0020475_Cricetulus                                      | LINE2B#Repetitive                               | 82.5  | 40 | 40  | 79  |
| ppy-mir-2861_mi0020953_Pongo                                         | RF02215;ZNF1-AS1_1;AFTD01088530.1/3-173         | 76.19 | 63 | 35  | 97  |
| osa-MIR2873b_mi0017257_Oryza                                         | hAT-25_ZM#hAT#Zea                               | 76.27 | 59 | 10  | 68  |
| osa-MIR2873c_mi0019856_Oryza                                         | RF00447;IRES_Kv1_4;AAPE02023601.1/141964-141709 | 82.93 | 41 | 81  | 120 |
| han-MIR2911_mi0022263_Helianthus                                     | LSU-rRNA_Ath                                    | 93.67 | 79 | 9   | 87  |
| nta-MIR2911_mi0021418_Nicotiana                                      | LSU-rRNA_Ath                                    | 90    | 70 | 1   | 70  |
| osa-MIR2919_mi0013261_Oryza                                          | RIRE3_LTR#Gypsy#Oryza                           | 87.5  | 56 | 103 | 158 |
| osa-MIR2921_mi0013263_Oryza                                          | ATLANTYS-LTR_OS#Gypsy#Oryza                     | 95    | 40 | 84  | 123 |
| osa-MIR2925_mi0013267_Oryza                                          | RF00100;7SK;AEYP01057393.1/35058-34745          | 76    | 50 | 4   | 48  |
| osa-MIR2931_mi0013273_Oryza                                          | METRAHAT#hAT#Medicago                           | 82.93 | 41 | 14  | 53  |
| mse-mir-2b_mi0021030_Manduca                                         | Gypsy-23_VV-l#Gypsy#Vitis                       | 81.4  | 43 | 2   | 44  |
| api-mir-3015a-1_mi0013956_Acyrtosiphon                               | DNA3-4_AP#DNA                                   | 93.02 | 43 | 16  | 58  |
| api-mir-3015b_mi0013960_Acyrtosiphon                                 | DNA3-4_AP#DNA                                   | 88.1  | 42 | 20  | 61  |
| api-mir-3015c_mi0014013_Acyrtosiphon                                 | DNA3-4_AP#DNA                                   | 90.91 | 44 | 13  | 56  |
| api-mir-3046_mi0014002_Acyrtosiphon                                  | RF00028;Intron_gpl;EF178596.1/1-306             | 81.4  | 43 | 3   | 45  |
| mmu-mir-3061_mi0014023_Mus                                           | RLTR26_MM#ERV2#Mus                              | 78.57 | 56 | 7   | 60  |
| mmu-mir-3066_mi0014028_Mus                                           | RF01766;cspA;CR378669.1/108242-107810           | 74.51 | 51 | 8   | 58  |
| mmu-mir-3068_mi0014030_Mus                                           | RF00418;SNORA58;AFTD01092205.1/66304-66438      | 98.68 | 76 | 1   | 76  |
| rno-mir-3068_mi0021534_Rattus                                        | RF00418;SNORA58;AFTD01092205.1/66304-66438      | 97.26 | 73 | 2   | 74  |
| mmu-mir-3069_mi0014031_Mus                                           | RF00231;SCARNA13;AC140477.2/80275-80001         | 100   | 65 | 1   | 65  |
| ENSRNOG00000035568 rno-mir-3074                                      | RF00607;SNORD98;AAIY01311124.1/260-197          | 82.98 | 47 | 523 | 60  |
| ENSMUSG00000092741 microRNA_3074-1_mouse                             | RF00607;SNORD98;AAIY01311124.1/260-197          | 82.98 | 47 | 523 | 60  |
| ENSMUSG00000092784 microRNA_3077 [Source:MGI_Symbol;Acc:MGI:4834250] | TguERVK7_N1_l#ERV2#Estrilidae                   | 70.37 | 81 | 453 |     |



|                                                                          |                                              |       |    |     |     |
|--------------------------------------------------------------------------|----------------------------------------------|-------|----|-----|-----|
| mmu-mir-3079_mi0014042_Mus                                               | RMER13A1#ERV2#Mus                            | 80.85 | 47 | 21  | 67  |
| ENSMUSG00000093118 microRNA_3083_[Source:MGI_Symbol;Acc:MGI:4834256]     | CR1-38_HM#CR1#Hydra                          | 95.77 | 71 | 440 | 774 |
| mmu-mir-3084-1_mi0014047_Mus                                             | RF00413;SNORA19;AAHX01049704.1/2906-2781     | 95.59 | 68 | 1   | 68  |
| mmu-mir-3084-2_mi0020958_Mus                                             | RF00413;SNORA19;AAHX01049704.1/2906-2781     | 95.59 | 68 | 1   | 68  |
| mmu-mir-3090_mi0014083_Mus                                               | MER5A#Repetitive                             | 83.64 | 55 | 10  | 62  |
| mmu-mir-3096a_mi0014089_Mus                                              | RF00606;SNORD93;AEKQ01077875.1/2760-2690     | 98.59 | 71 | 16  | 86  |
| mmu-mir-3096b_mi0016969_Mus                                              | RF00606;SNORD93;AEKQ01077875.1/2760-2690     | 98.59 | 71 | 10  | 80  |
| sha-mir-30c_mi0019635_Sarcophilus_harrisii_miR-30c_stem-loop             | L1-50A_XT                                    | 76.79 | 56 | 29  | 83  |
| sha-mir-30e_mi0019634_Sarcophilus_harrisii_miR-30e_stem-loop             | ERV3-1_CHO_I#ERV3#Choloepus                  | 81.82 | 44 | 74  | 116 |
| mmu-mir-30f_mi0021961_Mus                                                | hAT-6_XT#hAT#Xenopus                         | 80.49 | 41 | 33  | 71  |
| pma-mir-30g_mi0017046_Petromyzon                                         | RF00100;7SK;AALT01531718.1/6765-7059         | 73.58 | 53 | 31  | 78  |
| ENSRNOG00000049574 rno-mir-3102_[Source:miRBase;Acc:MI0021836] rno-mir-3 | ERV40_MD_I#ERV1#Monodelphis                  | 85.37 | 41 | 567 | 607 |
| mmu-mir-3110_mi0014107_Mus                                               | RMER13A2#ERV2#Mus                            | 76.62 | 77 | 5   | 76  |
| mmu-mir-3112_mi0014109_Mus                                               | RF00551;bicoid_3;AFPP01021574.1/8201-7656    | 80.49 | 41 | 3   | 41  |
| ptr-mir-3132_mi0020605_Pan_troglodytes_miR-3132_stem-loop                | IAPLTR4_I#ERV2#Mus                           | 73.77 | 61 | 46  | 103 |
| hsa-mir-3135b_mi0016809_Homo_sapiens_miR-3135b_stem-loop                 | RF00017;Metazoa_SRP;CABD02397156.1/1468-1211 | 84.91 | 53 | 16  | 68  |
| ppy-mir-3145_mi0020951_Pongo                                             | RF01705;Flavo-1;ABMW01089030.1/27-109        | 80    | 40 | 36  | 75  |
| ptr-mir-3149_mi0020603_Pan_troglodytes_miR-3149_stem-loop                | EnSpm-3_TA#EnSpm#Triticum                    | 86.36 | 44 | 60  | 103 |
| hsa-mir-3150b_mi0016426_Homo_sapiens_miR-3150b_stem-loop                 | GRANDE1_ZD_I#Gypsy#Zea                       | 75    | 52 | 17  | 66  |
| mml-mir-3154_mi0021288_Macaca                                            | Mariner-3_PGr#Mariner/Tc1#Puccinia           | 81.4  | 43 | 2   | 43  |
| ppy-mir-3154_mi0020950_Pongo                                             | Mariner-3_PGr#Mariner/Tc1#Puccinia           | 81.4  | 43 | 2   | 43  |
| ptr-mir-3154_mi0021269_Pan_troglodytes_miR-3154_stem-loop                | Mariner-3_PGr#Mariner/Tc1#Puccinia           | 81.4  | 43 | 2   | 43  |
| ppy-mir-3170_mi0020945_Pongo                                             | RF01417;RSV_RNA;ABRT010526064.1/378-90       | 80    | 40 | 6   | 45  |
| mml-mir-3173_mi0020879_Macaca                                            | L1_RS1_5end#L1#Cercopithecinae               | 81.4  | 43 | 22  | 63  |
| ppy-mir-3174_mi0020955_Pongo                                             | MER5A#Repetitive                             | 74.29 | 70 | 2   | 71  |
| tae-MIR319_mi0016453_Triticum_aestivum_miR319_stem-loop                  | Gypsy-2-I_TA#Gypsy#Triticum                  | 85    | 40 | 44  | 78  |
| vun-MIR319b_mi0019567_Vigna_unguiculata_miR319b_stem-loop                | VLINE10_VV#L1#Vitis                          | 85    | 40 | 4   | 41  |
| cme-MIR319c_mi0023234_Cucumis                                            | L1-5_LA#L1#Loxodonta                         | 76.92 | 52 | 76  | 127 |
| aly-MIR319d_mi0014633_Arabidopsis                                        | RF00028;Intron_gpl;HQ342626.1/1-200          | 80    | 45 | 211 | 255 |
| ptr-mir-3200_mi0020583_Pan_troglodytes_miR-3200_stem-loop                | LTR16E#ERV3#Homo                             | 90    | 40 | 26  | 65  |
| ppy-mir-320e_mi0020906_Pongo                                             | RF00019;Y_RNA;ABBA01017263.1/4152-4264       | 78    | 50 | 1   | 47  |
| ptr-mir-320e_mi0020577_Pan_troglodytes_miR-320e_stem-loop                | LTR54_MD#Endogenous                          | 80    | 45 | 29  | 71  |
| rno-mir-328b_mi0015479_Rattus                                            | LINE1E_OC#L1#Oryctolagus                     | 76.36 | 55 | 1   | 55  |
| ggo-mir-330_mi0020635_Gorilla                                            | MIR3#SINE#Mammalia                           | 82.93 | 41 | 5   | 42  |
| hme-mir-3338_mi0021778_Heliconius                                        | RF00019;Y_RNA;AAQR03172622.1/1281-1384       | 74.14 | 58 | 30  | 87  |
| mse-mir-3389_mi0021046_Manduca                                           | DMRT1C#Non-LTR                               | 90    | 40 | 33  | 72  |
| ccr-mir-34_mi0023392_Cyprinus                                            | VANDAL16#MuDR#Arabidopsis                    | 80    | 45 | 16  | 58  |
| sha-mir-340_mi0019601_Sarcophilus_harrisii_miR-340_stem-loop             | MARNA#Mariner/Tc1#Homo                       | 82    | 50 | 50  | 99  |
| bta-mir-3432-1_mi0014500_Bos                                             | CHRL#SINE#Cetartiodactyla                    | 86.76 | 68 | 24  | 91  |
| bta-mir-3432-2_mi0014501_Bos                                             | CHRL#SINE#Cetartiodactyla                    | 87.5  | 40 | 24  | 63  |
| ath-MIR3434_mi0014667_Arabidopsis                                        | TART#DMU02279#Drosophila                     | 78.85 | 52 | 37  | 84  |

|                                                                          |                                               |       |     |     |     |
|--------------------------------------------------------------------------|-----------------------------------------------|-------|-----|-----|-----|
| aly-MIR3442_mi0014658_Arabidopsis                                        | DNA8-42_AP#DNA                                | 81.4  | 43  | 137 | 177 |
| aly-MIR3444b_mi0015793_Arabidopsis                                       | RF00028;Intron_gpl;AB443869.1/1-522           | 82.93 | 41  | 59  | 99  |
| ggo-mir-346_mi0020737_Gorilla                                            | FERVR2_I#ERV1#Takifugu                        | 80.95 | 42  | 56  | 96  |
| ENSRNOG00000049021 rno-mir-3473_[Source:miRBase;Acc:MI0021538] rno-mir-3 | RF00100;7SK;AGTP01022634.1/19485-19793        | 82.93 | 41  | 531 | 571 |
| ENSMUSG00000093298 microRNA_3473b_mouse                                  | RF00015;U4;AAHX01028334.1/65497-65654         | 94.05 | 84  | 536 | 619 |
| mmu-mir-3473c_mi0018015_Mus                                              | RF00100;7SK;AALT01064164.1/445-100            | 80    | 50  | 3   | 51  |
| mmu-mir-3473d_mi0018033_Mus                                              | RF00015;U4;AAHX01028334.1/65497-65654         | 86    | 50  | 33  | 81  |
| mmu-mir-3473e_mi0022357_Mus                                              | RF00005;tRNA;AC157936.5/113940-113862         | 79.49 | 78  | 26  | 101 |
| sma-mir-3492_mi0021827_Schistosoma_mansonii_miR-3492_stem-loop           | RTE_SJ#RTE#Schistosoma                        | 74.42 | 86  | 6   | 91  |
| gga-mir-3524b_mi0022472_Gallus                                           | CR1-C4#CR1#Gallus                             | 90.91 | 44  | 8   | 51  |
| rno-mir-3542_mi0015396_Rattus                                            | CR1-X2_3end#CR1#Gallus                        | 76.27 | 59  | 36  | 93  |
| ENSRNOG00000035517 rno-mir-3557_[Source:miRBase;Acc:MI0015415] Mir3557   | MIRc#SINE2/tRNA#Mammalia                      | 73.28 | 131 | 431 | 554 |
| rno-mir-3559_mi0015421_Rattus                                            | PERERE-7#Non-LTR                              | 78.18 | 55  | 32  | 84  |
| rno-mir-3566_mi0015431_Rattus                                            | RF02215;ZNF1-AS1_1;ACTA01185582.1/11590-11391 | 80.43 | 46  | 9   | 50  |
| rno-mir-3586_mi0015461_Rattus                                            | MIR2#Repetitive                               | 82.61 | 46  | 19  | 63  |
| hsa-mir-3606_mi0015996_Homo_sapiens_miR-3606_stem-loop                   | Transib-4_DK#Transib#Drosophila               | 84.44 | 45  | 1   | 45  |
| gga-mir-3607_mi0022368_Gallus                                            | RF00341;snoZ39;ADDD01069082.1/320-382         | 92.06 | 63  | 25  | 87  |
| hsa-mir-3607_mi0015997_Homo_sapiens_miR-3607_stem-loop                   | RF00341;snoZ39;AAIY01356488.1/4173-4113       | 95.24 | 63  | 10  | 72  |
| hsa-mir-3611_mi0016001_Homo_sapiens_miR-3611_stem-loop                   | MER44C#Mariner/Tc1#Homo                       | 80.95 | 42  | 48  | 83  |
| hsa-mir-3613_mi0016003_Homo_sapiens_miR-3613_stem-loop                   | Gypsy-34_VV-I#Gypsy#Vitis                     | 80    | 40  | 24  | 63  |
| ssc-mir-3613_mi0022161_Sus_scrofa_miR-3613_stem-loop                     | Gypsy-34_VV-I#Gypsy#Vitis                     | 80    | 40  | 19  | 58  |
| hsa-mir-3619_mi0016009_Homo_sapiens_miR-3619_stem-loop                   | RF00001;5S_rRNA;AFYH01226274.1/2460-2567      | 84.09 | 44  | 14  | 53  |
| hsa-mir-3620_mi0016011_Homo_sapiens_miR-3620_stem-loop                   | Copia-53_SB-I#Copia#Sorghum                   | 82.5  | 40  | 5   | 41  |
| hsa-mir-3621_mi0016012_Homo_sapiens_miR-3621_stem-loop                   | RF02251;Six3os1_6;ABRN01211798.1/599-805      | 80.49 | 41  | 4   | 44  |
| vvi-MIR3625_mi0016018_Vitis_vinifera_miR3625_stem-loop                   | LTR2_Tbel#ERV2#Tupaia                         | 76    | 50  | 99  | 146 |
| han-MIR3630_mi0022265_Helianthus                                         | RF00357;snoR44_J54;AFSA01156848.1/1173-1257   | 95.24 | 84  | 10  | 93  |
| vvi-MIR3630_mi0016026_Vitis_vinifera_miR3630_stem-loop                   | RF00357;snoR44_J54;CAAP03005161.1/22116-22033 | 100   | 84  | 10  | 93  |
| vvi-MIR3631a_mi0016027_Vitis_vinifera_miR3631a_stem-loop                 | Harbinger-3N2_VV#Harbinger#Vitis              | 83.71 | 221 | 2   | 222 |
| vvi-MIR3631b_mi0016028_Vitis_vinifera_miR3631b_stem-loop                 | Harbinger-3N2_VV#Harbinger#Vitis              | 82.22 | 135 | 17  | 151 |
| vvi-MIR3631c_mi0016029_Vitis_vinifera_miR3631c_stem-loop                 | Harbinger-3N2_VV#Harbinger#Vitis              | 82.51 | 223 | 65  | 287 |
| vvi-MIR3631d_mi0016030_Vitis_vinifera_miR3631d_stem-loop                 | Harbinger-3N2_VV#Harbinger#Vitis              | 83.5  | 103 | 141 | 239 |
| vvi-MIR3634_mi0016033_Vitis_vinifera_miR3634_stem-loop                   | Gypsy-20-LTR_DR#Gypsy#Danio                   | 81.82 | 44  | 24  | 67  |
| vvi-MIR3637_mi0016037_Vitis_vinifera_miR3637_stem-loop                   | RF00028;Intron_gpl;JF421604.1/17-276          | 71.21 | 66  | 21  | 86  |
| vvi-MIR3638_mi0016038_Vitis_vinifera_miR3638_stem-loop                   | ATHATN3#hAT#Arabidopsis                       | 80    | 45  | 87  | 130 |
| vvi-MIR3639_mi0016039_Vitis_vinifera_miR3639_stem-loop                   | RF01766;cspA;ACYQ02000007.1/87522-87892       | 82.93 | 41  | 146 | 185 |
| vvi-MIR3640_mi0016040_Vitis_vinifera_miR3640_stem-loop                   | RF00013;6S;AGAZ01000075.1/11953-12140         | 82.5  | 40  | 6   | 45  |
| dme-mir-3645_mi0016045_Drosophila                                        | L1_AC_13#L2#Anolis                            | 80.49 | 41  | 92  | 132 |
| hsa-mir-3648_mi0016048_Homo_sapiens_miR-3648_stem-loop                   | MERMITE18E#DNA                                | 72.38 | 105 | 8   | 104 |
| hsa-mir-3651_mi0016051_Homo_sapiens_miR-3651_stem-loop                   | RF01229;SNORA84;CABD02382723.1/587-455        | 100   | 87  | 1   | 87  |
| hsa-mir-3653_mi0016053_Homo_sapiens_miR-3653_stem-loop                   | RF01200;SNORD125;AEHK01008479.1/7994-7899     | 100   | 96  | 10  | 105 |
| hsa-mir-3657_mi0016057_Homo_sapiens_miR-3657_stem-loop                   | Sola1-1_PPa#Sola#Physcomitrella               | 74.14 | 58  | 11  | 65  |

|                                                               |                                                 |       |     |    |     |
|---------------------------------------------------------------|-------------------------------------------------|-------|-----|----|-----|
| hsa-mir-3658_mi0016058_Homo_sapiens_miR-3658_stem-loop        | RF00017;Metazoa_SRP;AC202667.3/84348-84619      | 80.43 | 46  | 9  | 54  |
| hsa-mir-3665_mi0016066_Homo_sapiens_miR-3665_stem-loop        | Gypsy-8-I_CR#Gypsy#Chlamydomonas                | 81.48 | 54  | 4  | 56  |
| hsa-mir-3668_mi0016069_Homo_sapiens_miR-3668_stem-loop        | Caulimovirus-4_STu#Caulimoviridae#Solanum       | 85.37 | 41  | 16 | 55  |
| hsa-mir-3669_mi0016070_Homo_sapiens_miR-3669_stem-loop        | DNA-2-24_DR#DNA                                 | 76.54 | 81  | 1  | 81  |
| hsa-mir-3671_mi0016072_Homo_sapiens_miR-3671_stem-loop        | RF00028;Intron_gpl;FJ794187.1/2-465             | 81.4  | 43  | 26 | 68  |
| hsa-mir-3672_mi0016073_Homo_sapiens_miR-3672_stem-loop        | L1M3A_5#L1#Eutheria                             | 81.03 | 58  | 2  | 58  |
| hsa-mir-3673_mi0016074_Homo_sapiens_miR-3673_stem-loop        | RF00261;IRES_L-myc;ABRM01039850.1/128-341       | 79.41 | 102 | 1  | 102 |
| hsa-mir-3674_mi0016075_Homo_sapiens_miR-3674_stem-loop        | LTR8B#ERV1#Homo                                 | 95.12 | 41  | 1  | 41  |
| hsa-mir-3676_mi0016077_Homo_sapiens_miR-3676_stem-loop        | Ailuropoda_melanoleuca_GL192808.1.trna52-ThrAGT | 100   | 59  | 1  | 59  |
| hsa-mir-3677_mi0016078_Homo_sapiens_miR-3677_stem-loop        | HERV18#Endogenous                               | 80    | 40  | 15 | 54  |
| hsa-mir-3680-1_mi0016081_Homo_sapiens_miR-3680-1_stem-loop    | MER96#hAT#Homo                                  | 85.06 | 87  | 1  | 87  |
| hsa-mir-3680-2_mi0019113_Homo_sapiens_miR-3680-2_stem-loop    | MER96#hAT#Homo                                  | 85.06 | 87  | 1  | 87  |
| hsa-mir-3683_mi0016084_Homo_sapiens_miR-3683_stem-loop        | SATR1#SAT#Homo                                  | 84.93 | 73  | 1  | 69  |
| hsa-mir-3689b_mi0016411_Homo_sapiens_miR-3689b_stem-loop      | Copia-131_SB-I#Copia#Sorghum                    | 80.49 | 41  | 14 | 50  |
| asu-mir-36a_mi0018536_Ascaris                                 | GGLTR12B#ERV3#Gallus                            | 80.95 | 42  | 28 | 69  |
| pab-MIR3701_mi0016103_Picea                                   | Copia-75_Mad-I#Copia#Malus                      | 80    | 40  | 67 | 106 |
| pab-MIR3704_mi0016106_Picea                                   | LTR-4_Mad#LTR                                   | 80    | 40  | 36 | 73  |
| ame-mir-3720_mi0016168_Apis                                   | RF00218;SNORD46;AELG01001181.1/36719-36598      | 72.58 | 124 | 13 | 135 |
| ame-mir-3725_mi0016222_Apis                                   | RF00028;Intron_gpl;AY437979.1/26-396            | 82.93 | 41  | 3  | 41  |
| ame-mir-3737_mi0016236_Apis                                   | hAT-N2_Mad#hAT#Malus                            | 85.37 | 41  | 33 | 71  |
| ame-mir-3744_mi0016243_Apis                                   | RF00028;Intron_gpl;EU420843.1/2-451             | 81.82 | 44  | 16 | 58  |
| ame-mir-3746_mi0016144_Apis                                   | RF01577;RNase_P;AM910986.1/48164-48794          | 82.93 | 41  | 23 | 63  |
| ame-mir-3756_mi0016157_Apis                                   | RF00003;U1;ACPBO2031547.1/16978-17135           | 75.44 | 57  | 39 | 95  |
| ame-mir-3757_mi0016159_Apis                                   | Gypsy8-I_AP#Gypsy#Acyrtosiphon                  | 75.41 | 61  | 66 | 124 |
| ame-mir-3758_mi0016160_Apis                                   | DIRS-38_XT#DIRS#Xenopus                         | 80.49 | 41  | 13 | 52  |
| ame-MIR-3759_mi0016162_Apis                                   | RF00017;Metazoa_SRP;AEKZ01000517.1/17516-17220  | 97.83 | 92  | 1  | 92  |
| ame-mir-3760_mi0016163_Apis                                   | RF00028;Intron_gpl;AF387464.1/17-488            | 83.67 | 49  | 85 | 133 |
| ame-mir-3762_mi0016165_Apis                                   | Sola2-3_DPu#Sola#Daphnia                        | 81.91 | 94  | 34 | 125 |
| ame-mir-3767_mi0016171_Apis                                   | GYPSM1_I#Gypsy#Schmidtea                        | 80.43 | 46  | 46 | 91  |
| ame-mir-3774_mi0016181_Apis                                   | RF00028;Intron_gpl;EU246919.1/1-292             | 80.49 | 41  | 20 | 60  |
| mmu-mir-378c_mi0021923_Mus                                    | RF00001;5S_rRNA;ADFJ01000091.1/44416-44541      | 80.49 | 41  | 11 | 47  |
| mml-mir-378d_mi0020861_Macaca                                 | RF00005;tRNA;AAPN01094161.1/8954-9025           | 85.37 | 41  | 73 | 109 |
| ppy-mir-378d_mi0020908_Pongo                                  | THER2_ME#SINE3/5S#Macropus                      | 80.43 | 46  | 61 | 105 |
| hsa-mir-378d-2_mi0003840_Homo_sapiens_miR-378d-2_stem-loop    | Gypsy-43_MLP-I#Gypsy#Melampsora                 | 83.33 | 42  | 1  | 41  |
| hsa-mir-378g_mi0016761_Homo_sapiens_miR-378g_stem-loop        | RF00005;tRNA;AAPN01047639.1/1830-1901           | 81.4  | 43  | 1  | 41  |
| hsa-mir-378h_mi0016808_Homo_sapiens_miR-378h_stem-loop        | MIRc#SINE2/tRNA#Mammalia                        | 71.43 | 84  | 5  | 81  |
| ptr-mir-378j_mi0021263_Pan_troglodytes_miR-378j_stem-loop     | THER2_MD#SINE#Monodelphis                       | 82.93 | 41  | 23 | 62  |
| tca-mir-3806_mi0016263_Tribolium_castaneum_miR-3806_stem-loop | HAT-8_Mad#hAT#Malus                             | 74.55 | 55  | 55 | 108 |
| tca-mir-3814_mi0016272_Tribolium_castaneum_miR-3814_stem-loop | Gypsy-19_PGr-I#Gypsy#Puccinia                   | 76    | 50  | 1  | 50  |
| tca-mir-3819_mi0016406_Tribolium_castaneum_miR-3819_stem-loop | EnSpm-20_HMa#EnSpm#Hydra                        | 82.93 | 41  | 60 | 100 |
| tca-mir-3820_mi0016280_Tribolium_castaneum_miR-3820_stem-loop | GYPSY6-I_AG#Gypsy#Anopheles                     | 82.93 | 41  | 36 | 75  |

|                                                                 |                                                |       |    |    |     |
|-----------------------------------------------------------------|------------------------------------------------|-------|----|----|-----|
| tca-mir-3825_mi0016286_Tribolium_castaneum_miR-3825_stem-loop   | RF00028;Intron_gpl;DQ238571.1/1-323            | 76.67 | 60 | 1  | 55  |
| tca-mir-3830_mi0016292_Tribolium_castaneum_miR-3830_stem-loop   | R1-1B_DK#R1#Drosophila                         | 80.49 | 41 | 1  | 39  |
| tca-mir-3834_mi0016297_Tribolium_castaneum_miR-3834_stem-loop   | Polinton-2_TC#Polinton#Tribolium               | 81.25 | 48 | 6  | 47  |
| tca-mir-3837_mi0016301_Tribolium_castaneum_miR-3837_stem-loop   | Polinton-3_HM#Polinton#Hydra                   | 80.49 | 41 | 1  | 41  |
| tca-mir-3838_mi0016307_Tribolium_castaneum_miR-3838_stem-loop   | Sola1-3_AP#Sola#Acyrtosiphon                   | 80.95 | 42 | 55 | 96  |
| tca-mir-3841_mi0016310_Tribolium_castaneum_miR-3841_stem-loop   | RF00459;MPMV_package;AAGV020389535.1/570-288   | 80.49 | 41 | 1  | 39  |
| tca-mir-3843_mi0016313_Tribolium_castaneum_miR-3843_stem-loop   | Gypsy-101_GM-I#Gypsy#Glycine                   | 73.21 | 56 | 11 | 62  |
| tca-mir-3846_mi0016317_Tribolium_castaneum_miR-3846_stem-loop   | Mariner-26_SM#Mariner/Tc1#Schmidtea            | 80.49 | 41 | 50 | 89  |
| tca-mir-3850_mi0016324_Tribolium_castaneum_miR-3850_stem-loop   | ENSPM2_VV#EnSpm#Vitis                          | 78.43 | 51 | 69 | 118 |
| tca-mir-3851d_mi0016337_Tribolium_castaneum_miR-3851d_stem-loop | Kiri-30_AAe#Kiri#Aedes                         | 82.22 | 45 | 78 | 121 |
| tca-mir-3853_mi0016328_Tribolium_castaneum_miR-3853_stem-loop   | RF00100;7SK;ABRR01136600.1/1387-1662           | 75.47 | 53 | 58 | 107 |
| tca-mir-3855_mi0016331_Tribolium_castaneum_miR-3855_stem-loop   | Gypsy-2_DFi-I#Gypsy#Drosophila                 | 77.94 | 68 | 5  | 72  |
| tca-mir-3859_mi0016343_Tribolium_castaneum_miR-3859_stem-loop   | RF00291;snoR639;AEKZ01013897.1/31320-31187     | 79.1  | 67 | 4  | 68  |
| tca-mir-3861_mi0016346_Tribolium_castaneum_miR-3861_stem-loop   | RF00028;Intron_gpl;AF289746.1/840-401          | 78.18 | 55 | 42 | 96  |
| tca-mir-3868_mi0016362_Tribolium_castaneum_miR-3868_stem-loop   | ATCOPIA17LTR#Copia#Arabidopsis                 | 80.43 | 46 | 49 | 94  |
| tca-mir-3873_mi0016367_Tribolium_castaneum_miR-3873_stem-loop   | REP_DE#Repetitive                              | 77.36 | 53 | 70 | 120 |
| tca-mir-3876_mi0016370_Tribolium_castaneum_miR-3876_stem-loop   | Gypsy-1_LEN-I#Gypsy#Lodderomyces               | 85    | 40 | 14 | 50  |
| tca-mir-3897_mi0016397_Tribolium_castaneum_miR-3897_stem-loop   | Gypsy-9_DPu-I#Gypsy#Daphnia                    | 80    | 40 | 36 | 75  |
| tca-mir-3901_mi0016401_Tribolium_castaneum_miR-3901_stem-loop   | RF00028;Intron_gpl;AF239537.1/2-483            | 79.37 | 63 | 61 | 121 |
| tca-mir-3902_mi0016402_Tribolium_castaneum_miR-3902_stem-loop   | BLOOD_I#Gypsy#Drosophila                       | 80.49 | 41 | 57 | 97  |
| tca-mir-3903_mi0016403_Tribolium_castaneum_miR-3903_stem-loop   | Sola1-4_AP#Sola#Acyrtosiphon                   | 80    | 40 | 26 | 60  |
| tca-mir-3904_mi0016404_Tribolium_castaneum_miR-3904_stem-loop   | RF00028;Intron_gpl;X75706.1/1-492              | 73.42 | 79 | 26 | 102 |
| hsa-mir-3907_mi0016410_Homo_sapiens_miR-3907_stem-loop          | RF00100;7SK;AAKN02053877.1/86997-86755         | 76.27 | 59 | 75 | 129 |
| hsa-mir-3908_mi0016412_Homo_sapiens_miR-3908_stem-loop          | RF00017;Metazoa_SRP;ABSL01174557.1/586-314     | 97.5  | 40 | 83 | 122 |
| hsa-mir-3910-1_mi0016414_Homo_sapiens_miR-3910-1_stem-loop      | HARB-3_ALy#Harbinger#Arabidopsis               | 80    | 40 | 58 | 95  |
| hsa-mir-3910-2_mi0016431_Homo_sapiens_miR-3910-2_stem-loop      | HARB-3_ALy#Harbinger#Arabidopsis               | 80    | 40 | 1  | 38  |
| hsa-mir-3914-1_mi0016419_Homo_sapiens_miR-3914-1_stem-loop      | QUASIMODO_I#Gypsy#Drosophila                   | 80.95 | 42 | 44 | 85  |
| hsa-mir-3914-2_mi0016421_Homo_sapiens_miR-3914-2_stem-loop      | QUASIMODO_I#Gypsy#Drosophila                   | 80.95 | 42 | 13 | 54  |
| hsa-mir-3916_mi0016422_Homo_sapiens_miR-3916_stem-loop          | SC-6_LTR#Copia#Oryza                           | 85    | 40 | 8  | 47  |
| hsa-mir-3919_mi0016425_Homo_sapiens_miR-3919_stem-loop          | RF00019;Y_RNA;ABDC01224945.1/1546-1450         | 82.5  | 40 | 42 | 81  |
| ggo-mir-3923_mi0020843_Gorilla                                  | MLT1B#Non-LTR                                  | 88.1  | 42 | 31 | 72  |
| hsa-mir-3923_mi0016430_Homo_sapiens_miR-3923_stem-loop          | MLT1B#Non-LTR                                  | 81.48 | 54 | 3  | 56  |
| hsa-mir-3924_mi0016432_Homo_sapiens_miR-3924_stem-loop          | RF01825;RUF21;AABY01000015.1/103580-104263     | 75.47 | 53 | 10 | 61  |
| hsa-mir-3925_mi0016433_Homo_sapiens_miR-3925_stem-loop          | TIGGER1#Mariner/Tc1#Homo                       | 80    | 50 | 34 | 77  |
| hsa-mir-3929_mi0016439_Homo_sapiens_miR-3929_stem-loop          | RF00017;Metazoa_SRP;ACFV01135724.1/19790-19517 | 95.65 | 46 | 2  | 47  |
| hsa-mir-3934_mi0016590_Homo_sapiens_miR-3934_stem-loop          | MIR#SINE2/tRNA#Mammalia                        | 76.29 | 97 | 15 | 107 |
| ppy-mir-3934_mi0020923_Pongo                                    | MIR#SINE#Mammalia                              | 76.67 | 90 | 11 | 96  |
| hsa-mir-3935_mi0016591_Homo_sapiens_miR-3935_stem-loop          | Copia-54_VV-I#Copia#Vitis                      | 82.5  | 40 | 23 | 60  |
| ppy-mir-3938_mi0020939_Pongo                                    | RF00011;RNaseP_bact_b;AL445564.1/66939-67229   | 72.22 | 72 | 8  | 78  |
| cme-MIR393a_mi0023240_Cucumis                                   | HELITRON4#DNA                                  | 80.49 | 41 | 28 | 68  |
| tcc-MIR393a_mi0017505_Theobroma_cacao_miR393a_stem-loop         | RF00028;Intron_gpl;AF152653.1/1-459            | 80.43 | 46 | 36 | 81  |

|                                                         |                                              |       |    |     |     |
|---------------------------------------------------------|----------------------------------------------|-------|----|-----|-----|
| cme-MIR393b_mi0023241_Cucumis                           | L1-6_TS#L1#Tarsius                           | 82.81 | 64 | 45  | 104 |
| gma-MIR393d_mi0021705_Glycine                           | CR1-78_HM#CR1#Hydra                          | 80.95 | 42 | 49  | 90  |
| gma-MIR393g_mi0021708_Glycine                           | CR1-78_HM#CR1#Hydra                          | 80.95 | 42 | 47  | 88  |
| ssl-MIR394_mi0019349_Salvia_sclarea_miR394_stem-loop    | RF00028;Intron_gpl;AJ544485.1/6-240          | 85.37 | 41 | 57  | 95  |
| csi-MIR3948_mi0016730_Citrus                            | ERV1-1N-EC_I#ERV1#Equus                      | 74.55 | 55 | 75  | 129 |
| aly-MIR394a_mi0014574_Arabidopsis                       | CR1-18_HM#CR1#Hydra                          | 77.36 | 53 | 91  | 142 |
| cme-MIR394a_mi0023244_Cucumis                           | ATCOPIA84LTR#Copia#Arabidopsis               | 85    | 40 | 35  | 73  |
| gma-MIR394a_mi0016582_Glycine                           | TUB1#SINE#Tupaia                             | 81.25 | 48 | 40  | 86  |
| cme-MIR394b_mi0023243_Cucumis                           | RF00028;Intron_gpl;HQ613698.1/2-268          | 86.05 | 43 | 50  | 92  |
| tcc-MIR394b_mi0017508_Theobroma_cacao_miR394b_stem-loop | Copia-20_CQ-I#Copia#Culex                    | 80.95 | 42 | 85  | 124 |
| csi-MIR3951_mi0016734_Citrus                            | RLTR10A#ERV2#Mus                             | 85.37 | 41 | 87  | 126 |
| oar-mir-3955_mi0016916_Ovis                             | RF00600;SNORA79;DAAA02053249.1/42516-42661   | 97.53 | 81 | 26  | 106 |
| cme-MIR395a_mi0023245_Cucumis                           | TRANSIB1_AG#Transib#Anopheles                | 80.43 | 46 | 13  | 58  |
| aly-MIR395i_mi0015778_Arabidopsis                       | Mariner-2_AP#Mariner/Tc1#Acyrtosiphon        | 76.47 | 51 | 22  | 68  |
| hsa-mir-3960_mi0016964_Homo_sapiens_miR-3960_stem-loop  | Gypsy-8-I_CR#Gypsy#Chlamydomonas             | 90    | 40 | 50  | 89  |
| mmu-mir-3960_mi0016963_Mus                              | Copia10-I_CR#Copia#Chlamydomonas             | 75.44 | 57 | 17  | 73  |
| cme-MIR396a_mi0023210_Cucumis                           | Gypsy-21_Mad-I#Gypsy#Malus                   | 81.4  | 43 | 5   | 47  |
| nta-MIR396a_mi0021398_Nicotiana                         | RF00028;Intron_gpl;DQ899185.1/1-482          | 82.5  | 40 | 66  | 104 |
| tcc-MIR396a_mi0017511_Theobroma_cacao_miR396a_stem-loop | Gypsy-7_ALY-I#Gypsy#Arabidopsis              | 81.4  | 43 | 97  | 139 |
| aly-MIR396b_mi0014582_Arabidopsis                       | Copia15-VV_I#Copia#Vitis                     | 81.63 | 49 | 51  | 97  |
| nta-MIR396b_mi0021399_Nicotiana                         | TABARE#Endogenous                            | 73.85 | 65 | 19  | 82  |
| csi-MIR396c_mi0016735_Citrus                            | ATENSPM5#EnSpm#Arabidopsis                   | 100   | 52 | 41  | 92  |
| cme-MIR396d_mi0023251_Cucumis                           | RF00100;7SK;AEYP01044022.1/6607-6374         | 85.37 | 41 | 107 | 147 |
| cme-MIR396e_mi0023266_Cucumis                           | ATHILA7_I#Gypsy#Arabidopsis                  | 90.7  | 43 | 69  | 111 |
| gma-MIR396e_mi0016586_Glycine                           | Gypsy-36_Mad-I#Gypsy#Malus                   | 82.93 | 41 | 7   | 44  |
| tcc-MIR396e_mi0017515_Theobroma_cacao_miR396e_stem-loop | BEL-8_DPu-I#BEL#Daphnia                      | 80.95 | 42 | 83  | 124 |
| mdm-MIR396g_mi0023099_Malus                             | CR1-32_DR#CR1#Danio                          | 75.41 | 61 | 63  | 121 |
| nta-MIR397_mi0021401_Nicotiana                          | hAT-11N_VV#hAT#Vitis                         | 80.43 | 46 | 3   | 48  |
| ssl-MIR397_mi0019352_Salvia_sclarea_miR397_stem-loop    | BEL-98_AA-I#BEL#Aedes                        | 76.36 | 55 | 9   | 63  |
| hsa-mir-3972_mi0016990_Homo_sapiens_miR-3972_stem-loop  | MER45C#hAT#Homo                              | 73.17 | 82 | 1   | 82  |
| hsa-mir-3974_mi0016992_Homo_sapiens_miR-3974_stem-loop  | TIRANT_I#LTR                                 | 75.47 | 53 | 40  | 92  |
| hsa-mir-3975_mi0016993_Homo_sapiens_miR-3975_stem-loop  | I-5_DBp#I#Drosophila                         | 78    | 50 | 5   | 53  |
| ssl-MIR398_mi0019353_Salvia_sclarea_miR398_stem-loop    | RF00002;5_8S_rRNA;DAAA02070793.1/70449-70600 | 80    | 40 | 1   | 40  |
| bdi-MIR398b_mi0018150_Brachypodium                      | Copia49-PTR_I#Copia#Populus                  | 81.25 | 48 | 44  | 86  |
| tcc-MIR399a_mi0017519_Theobroma_cacao_miR399a_stem-loop | RF00023;tmRNA;CP002189.2/623630-624062       | 85    | 40 | 49  | 88  |
| aly-MIR399b_mi0014589_Arabidopsis                       | RF00028;Intron_gpl;AJ290270.1/2-504          | 80    | 40 | 58  | 97  |
| cme-MIR399b_mi0023271_Cucumis                           | RF00017;Metazoa_SRP;CABD02064933.1/1393-1142 | 85.19 | 54 | 56  | 107 |
| csi-MIR399b_mi0016713_Citrus                            | RF00028;Intron_gpl;AY608132.1/2-322          | 81.63 | 49 | 74  | 120 |
| cme-MIR399c_mi0023256_Cucumis                           | L1_AC_7#L2#Anolis                            | 90.24 | 41 | 47  | 87  |
| tcc-MIR399c_mi0017521_Theobroma_cacao_miR399c_stem-loop | DIRS-5_PGr#DIRS#Puccinia                     | 77.27 | 66 | 70  | 129 |
| gma-MIR399e_mi0019777_Glycine                           | RF01766;cspA;CABM01000036.1/41547-41950      | 77.78 | 54 | 80  | 131 |

|                                                          |                                                |       |     |     |     |
|----------------------------------------------------------|------------------------------------------------|-------|-----|-----|-----|
| cme-MIR399f_mi0023191_Cucumis                            | CR1-18_HM#CR1#Hydra                            | 74.65 | 71  | 27  | 92  |
| aly-MIR400_mi0014594_Arabidopsis                         | RF00023;tmRNA;AACY022586141.1/19-417           | 77.78 | 54  | 110 | 161 |
| aly-MIR408_mi0014596_Arabidopsis                         | ERV5_1-I_MM#Endogenous                         | 91.84 | 49  | 142 | 190 |
| vun-MIR408_mi0019578_Vigna_unguiculata_miR408_stem-loop  | Gypsy-36_DWil-I#Gypsy#Drosophila               | 80.49 | 41  | 174 | 214 |
| gma-MIR408b_mi0018648_Glycine                            | MuDR-18_VV#MuDR#Vitis                          | 83.72 | 43  | 46  | 87  |
| gma-MIR408d_mi0017848_Glycine                            | MuDR-18_VV#MuDR#Vitis                          | 84.44 | 45  | 42  | 82  |
| cin-mir-4179b_mi0019170_Ciona                            | Penelope1_CI#Penelope#Ciona                    | 82.54 | 63  | 15  | 74  |
| ggo-mir-421_mi0020715_Gorilla                            | MIR2#Repetitive                                | 87.23 | 47  | 24  | 69  |
| ssc-mir-421_mi0015925_Sus_scrofa_miR-421_stem-loop       | MIR2#Repetitive                                | 86.67 | 45  | 1   | 44  |
| aly-MIR4223_mi0015784_Arabidopsis                        | L1_AC_6#L2#Anolis                              | 80.49 | 41  | 85  | 124 |
| ath-MIR4227_mi0015816_Arabidopsis                        | LINE1B_MT#L1#Medicago                          | 76.47 | 51  | 67  | 117 |
| aly-MIR4234_mi0015796_Arabidopsis                        | ATRAN#DNA                                      | 81.4  | 43  | 80  | 122 |
| aly-MIR4237_mi0015799_Arabidopsis                        | RF00167;Purine;ADCR01000004.1/65332-65427      | 80.49 | 41  | 62  | 102 |
| ath-MIR4245_mi0020194_Arabidopsis                        | SPMLIKE#DNA                                    | 73.85 | 65  | 44  | 104 |
| aly-MIR4248a_mi0015810_Arabidopsis                       | BRODYAGA2#DNA                                  | 90    | 40  | 146 | 185 |
| aly-MIR4248b_mi0015811_Arabidopsis                       | BRODYAGA2#DNA                                  | 90    | 40  | 152 | 191 |
| aly-MIR4248c_mi0015812_Arabidopsis                       | BRODYAGA2#DNA                                  | 89.13 | 46  | 133 | 178 |
| ccr-mir-430_mi0023398_Cyprinus                           | RF01413;CABZ01102744.1/29-118                  | 91.3  | 69  | 1   | 69  |
| ssc-mir-4331_mi0015910_Sus_scrofa_miR-4331_stem-loop     | PRE1_SS#SINE#Sus                               | 83.1  | 71  | 4   | 74  |
| ssc-mir-4332_mi0015917_Sus_scrofa_miR-4332_stem-loop     | LSU-rRNA_Hsa#rRNA#Metazoa                      | 88.17 | 93  | 15  | 107 |
| ssc-mir-4333_mi0015918_Sus_scrofa_miR-4333_stem-loop     | RF00563;SNORA53;X77338.1/4681-4920             | 96    | 100 | 3   | 102 |
| ssc-mir-4336_mi0015930_Sus_scrofa_miR-4336_stem-loop     | RF00425;SNORA18;CU582930.10/144359-144494      | 92.77 | 83  | 1   | 78  |
| ssc-mir-4339_mi0015935_Sus_scrofa_miR-4339_stem-loop     | RF02164;PVT1_1;AAQQ01553941.1/1089-1283        | 80.85 | 47  | 4   | 46  |
| gma-MIR4345_mi0016474_Glycine                            | RF00100;7SK;AANN01738378.1/2213-2487           | 80    | 45  | 14  | 58  |
| gma-MIR4352b_mi0016517_Glycine                           | RF00028;Intron_gpl;AY251180.1/13-327           | 82.22 | 45  | 75  | 118 |
| gma-MIR4357_mi0016490_Glycine                            | TguLTRK4a#ERV2#Estrilidae                      | 80.49 | 41  | 2   | 40  |
| gma-MIR4359a_mi0016492_Glycine                           | TGM1_GM#transposon#Glycine                     | 76.47 | 119 | 1   | 112 |
| gma-MIR4359b_mi0016494_Glycine                           | TGM1_GM#transposon#Glycine                     | 80    | 50  | 18  | 67  |
| gma-MIR4363_mi0016500_Glycine                            | GmCOPIA10_I#Copia#Glycine                      | 98.2  | 111 | 1   | 111 |
| gma-MIR4371b_mi0016515_Glycine                           | RF00017;Metazoa_SRP;ABDC01511710.1/1013-730    | 81.82 | 44  | 34  | 76  |
| ssp-MIR437a_mi0018182_Saccharum_ssp._miR437a_stem-loop   | STOWAWAY14_SB#DNA                              | 92.5  | 40  | 136 | 175 |
| ssp-MIR437b_mi0018183_Saccharum_ssp._miR437b_stem-loop   | DNA-2-N2_TA#DNA                                | 87.04 | 54  | 101 | 154 |
| ssp-MIR437c_mi0018184_Saccharum_ssp._miR437c_stem-loop   | STOWAWAY14_SB#DNA                              | 87.72 | 57  | 121 | 177 |
| sbi-MIR437x_mi0023516_Sorghum_bicolor_miR437x_stem-loop  | STOWAWAY3_SB#DNA                               | 85.47 | 234 | 26  | 259 |
| gma-MIR4388_mi0016541_Glycine                            | MuDRASH3_MT#MuDR#Medicago                      | 80.85 | 47  | 110 | 153 |
| gma-MIR4391_mi0016545_Glycine                            | Copia-58_VV-I#Copia#Vitis                      | 82.46 | 57  | 1   | 54  |
| gma-MIR4402_mi0016561_Glycine                            | Clu-168_AG#DNA                                 | 80.85 | 47  | 6   | 51  |
| gma-MIR4408_mi0016568_Glycine                            | RF00410;SNORA2;AANN01024386.1/1105-1234        | 80    | 45  | 9   | 49  |
| hsa-mir-4419a_mi0016755_Homo_sapiens_miR-4419a_stem-loop | RF00017;Metazoa_SRP;AEHK01183279.1/21535-21310 | 94    | 50  | 1   | 50  |
| hsa-mir-4419b_mi0016861_Homo_sapiens_miR-4419b_stem-loop | RF00017;Metazoa_SRP;ACFV01171902.1/6544-6848   | 86.96 | 46  | 25  | 67  |
| hsa-mir-4420_mi0016757_Homo_sapiens_miR-4420_stem-loop   | L1ME3C_3end#L1#Eutheria                        | 80.85 | 47  | 9   | 55  |

|                                                                      |                                                |       |     |     |     |
|----------------------------------------------------------------------|------------------------------------------------|-------|-----|-----|-----|
| hsa-mir-4421_mi0016758_Homo_sapiens_miR-4421_stem-loop               | MER52#Repetitive                               | 87.5  | 64  | 3   | 66  |
| hsa-mir-4426_mi0016765_Homo_sapiens_miR-4426_stem-loop               | BEL1-I_SM#BEL#Schmidtea                        | 93.62 | 47  | 6   | 52  |
| hsa-mir-4428_mi0016767_Homo_sapiens_miR-4428_stem-loop               | LTR9#Long                                      | 90.63 | 64  | 10  | 73  |
| ptr-mir-4428_mi0020616_Pan_troglodytes_miR-4428_stem-loop            | LTR9#Long                                      | 87.85 | 107 | 5   | 111 |
| hsa-mir-4430_mi0016769_Homo_sapiens_miR-4430_stem-loop               | RF00017;Metazoa_SRP;ABSL01052596.1/40108-40384 | 88.89 | 45  | 2   | 46  |
| hsa-mir-4438_mi0016781_Homo_sapiens_miR-4438_stem-loop               | L1P2_5#LINE#Eutheria                           | 81.25 | 48  | 4   | 45  |
| ptr-mir-4446_mi0020576_Pan_troglodytes_miR-4446_stem-loop            | CER1#Gypsy#Caenorhabditis                      | 76.47 | 51  | 28  | 74  |
| hsa-mir-4447_mi0016790_Homo_sapiens_miR-4447_stem-loop               | MER20#hAT#Homo                                 | 88.1  | 42  | 50  | 91  |
| hsa-mir-4448_mi0016791_Homo_sapiens_miR-4448_stem-loop               | LTR13#LTR#Homo                                 | 81.93 | 83  | 5   | 86  |
| hsa-mir-4449_mi0016792_Homo_sapiens_miR-4449_stem-loop               | ENSPM2_ZM#EnSpm#Zea                            | 76    | 50  | 18  | 66  |
| ssp-MIR444a_mi0018185_Saccharum_ssp._miR444a_stem-loop               | Gypsy-38_DAn-l#Gypsy#Drosophila                | 80.95 | 42  | 16  | 57  |
| ssp-MIR444b_mi0018186_Saccharum_ssp._miR444b_stem-loop               | Gypsy-38_DAn-l#Gypsy#Drosophila                | 80.95 | 42  | 16  | 57  |
| ppy-mir-4451_mi0020910_Pongo                                         | RF00001;5S_rRNA;AAWZ02000075.1/14748-14643     | 80    | 40  | 12  | 49  |
| hsa-mir-4452_mi0016798_Homo_sapiens_miR-4452_stem-loop               | RF00017;Metazoa_SRP;ABRT010032086.1/1659-1370  | 84.09 | 44  | 2   | 45  |
| hsa-mir-4459_mi0016805_Homo_sapiens_miR-4459_stem-loop               | SVA#SINE#Homo                                  | 86.54 | 52  | 15  | 65  |
| hsa-mir-4463_mi0016811_Homo_sapiens_miR-4463_stem-loop               | MER5A#Repetitive                               | 75.76 | 66  | 4   | 67  |
| hsa-mir-4466_mi0016817_Homo_sapiens_miR-4466_stem-loop               | EnSpm-2_PGr#EnSpm#Puccinia                     | 75.47 | 53  | 2   | 53  |
| ENSMUSG00000092990 microRNA_446q [Source:MGI_Symbol;Acc:MGI:4950412] | TRAS1#Non-LTR                                  | 92.73 | 55  | 497 | 548 |
| hsa-mir-4472-2_mi0016824_Homo_sapiens_miR-4472-2_stem-loop           | RF00017;Metazoa_SRP;AEHL01226555.1/1994-1688   | 93.48 | 46  | 22  | 67  |
| hsa-mir-4481_mi0016842_Homo_sapiens_miR-4481_stem-loop               | MSTC#ERV3#Eutheria                             | 84.31 | 51  | 1   | 47  |
| hsa-mir-4488_mi0016849_Homo_sapiens_miR-4488_stem-loop               | Copia-47_ZM-l#Copia#Zea                        | 85    | 40  | 13  | 52  |
| hsa-mir-4494_mi0016856_Homo_sapiens_miR-4494_stem-loop               | MER44B#Repetitive                              | 85.71 | 56  | 2   | 56  |
| hsa-mir-4497_mi0016859_Homo_sapiens_miR-4497_stem-loop               | MERMITEA#DNA                                   | 71.25 | 80  | 13  | 87  |
| hsa-mir-4502_mi0016865_Homo_sapiens_miR-4502_stem-loop               | TIGGER1#Mariner/Tc1#Homo                       | 86.89 | 61  | 1   | 61  |
| hsa-mir-4503_mi0016866_Homo_sapiens_miR-4503_stem-loop               | Gypsy9-NVi_l#Gypsy#Nasonia                     | 81.4  | 43  | 41  | 83  |
| hsa-mir-4504_mi0016867_Homo_sapiens_miR-4504_stem-loop               | L1MA8#L1#Homo                                  | 83.33 | 42  | 51  | 92  |
| ptr-mir-4504_mi0020612_Pan_troglodytes_miR-4504_stem-loop            | L1MA8#Repetitive                               | 90.91 | 44  | 8   | 51  |
| hsa-mir-4507_mi0016871_Homo_sapiens_miR-4507_stem-loop               | P-1_CR#P#Chlamydomonas                         | 73.58 | 53  | 2   | 51  |
| hsa-mir-4508_mi0016872_Homo_sapiens_miR-4508_stem-loop               | Gypsy-6-l_CR#Gypsy#Chlamydomonas               | 80.49 | 41  | 20  | 60  |
| bta-mir-450b_mi0021121_Bos                                           | CR1-38_HM#CR1#Hydra                            | 76.79 | 56  | 1   | 56  |
| hsa-mir-4512_mi0016878_Homo_sapiens_miR-4512_stem-loop               | Alu2_TS#SINE1/7SL#Tarsius                      | 92.86 | 42  | 3   | 44  |
| hsa-mir-4522_mi0016889_Homo_sapiens_miR-4522_stem-loop               | RF00100;7SK;AFSB01232720.1/25848-25518         | 80.43 | 46  | 42  | 85  |
| hsa-mir-4525_mi0016892_Homo_sapiens_miR-4525_stem-loop               | MER52D#ERV1#Homo                               | 80.95 | 42  | 34  | 74  |
| hsa-mir-4528_mi0016895_Homo_sapiens_miR-4528_stem-loop               | RF00028;Intron_gpl;AY699227.1/1-486            | 81.25 | 48  | 23  | 68  |
| ggo-mir-4536_mi0020841_Gorilla                                       | CR1-18_HM#CR1#Hydra                            | 73.2  | 97  | 2   | 96  |
| mml-mir-4536_mi0020880_Macaca                                        | RF00100;7SK;AALT01305052.1/1773-1464           | 80.85 | 47  | 65  | 111 |
| ptr-mir-4536_mi0020599_Pan_troglodytes_miR-4536_stem-loop            | RF02112;DLG2-AS1_1;AFEY01409503.1/4522-4722    | 83.72 | 43  | 27  | 67  |
| hsa-mir-4536-1_mi0016906_Homo_sapiens_miR-4536-1_stem-loop           | RF02112;DLG2-AS1_1;AFEY01409503.1/4522-4722    | 83.72 | 43  | 42  | 82  |
| hsa-mir-4536-2_mi0019149_Homo_sapiens_miR-4536-2_stem-loop           | RF02112;DLG2-AS1_1;AFEY01409503.1/4522-4722    | 83.72 | 43  | 7   | 47  |
| hsa-mir-4537_mi0016908_Homo_sapiens_miR-4537_stem-loop               | GCTCA@1                                        | 86.15 | 65  | 1   | 65  |
| hsa-mir-4538_mi0016909_Homo_sapiens_miR-4538_stem-loop               | GCCCA@1                                        | 82.81 | 64  | 13  | 76  |

|                                                                      |                                             |       |    |     |     |
|----------------------------------------------------------------------|---------------------------------------------|-------|----|-----|-----|
| hsa-mir-4539_mi0016910_Homo_sapiens_miR-4539_stem-loop               | GCTCA@1                                     | 86.36 | 44 | 14  | 57  |
| ccr-mir-454a_mi0023399_Cyprinus                                      | RF00618;U4atac;AGCE01069177.1/108597-108472 | 80.49 | 41 | 22  | 61  |
| pma-mir-4558_mi0017168_Petromyzon                                    | RTAg4#Non-LTR                               | 76.36 | 55 | 29  | 82  |
| pma-mir-4587_mi0017197_Petromyzon                                    | L1_AC_7#L2#Anolis                           | 85.71 | 42 | 26  | 66  |
| pma-mir-4589_mi0017199_Petromyzon                                    | TART_DV#Non-LTR                             | 82.5  | 40 | 3   | 42  |
| pma-mir-4615_mi0017226_Petromyzon                                    | MARE2#Mariner/Tc1#Mammalia                  | 77.78 | 63 | 4   | 66  |
| hsa-mir-4637_mi0017264_Homo_sapiens_miR-4637_stem-loop               | EnSpm-N21_SBi#EnSpm#Sorghum                 | 80.49 | 41 | 27  | 62  |
| ENSMUSG00000078026 microRNA_4660_[Source:MGI_Symbol;Acc:MGI:4834279] | TRAS1#Non-LTR                               | 87.5  | 40 | 501 | 540 |
| hsa-mir-4666b_mi0019299_Homo_sapiens_miR-4666b_stem-loop             | MSTA#ERV3#Primates                          | 82.98 | 47 | 30  | 76  |
| ptr-mir-4667_mi0020607_Pan_troglodytes_miR-4667_stem-loop            | hATm-53_HM#hAT#Hydra                        | 80.95 | 42 | 10  | 51  |
| hsa-mir-4668_mi0017298_Homo_sapiens_miR-4668_stem-loop               | Pifo_I#Gypsy#Drosophila                     | 73.33 | 60 | 7   | 66  |
| mmu-mir-466b-4_mi0014060_Mus                                         | TRAS1#Non-LTR                               | 87.5  | 40 | 1   | 40  |
| mmu-mir-466b-5_mi0014063_Mus                                         | CR1-18_HM#CR1#Hydra                         | 81.97 | 61 | 1   | 59  |
| mmu-mir-466b-6_mi0014067_Mus                                         | TRAS1#Non-LTR                               | 87.5  | 40 | 1   | 40  |
| mmu-mir-466b-7_mi0014070_Mus                                         | CR1-18_HM#CR1#Hydra                         | 81.97 | 61 | 1   | 59  |
| mmu-mir-466b-8_mi0014112_Mus                                         | CR1-18_HM#CR1#Hydra                         | 80.65 | 62 | 1   | 60  |
| mmu-mir-466c-2_mi0014057_Mus                                         | CR1-18_HM#CR1#Hydra                         | 78.69 | 61 | 1   | 61  |
| rno-mir-466d_mi0015419_Rattus                                        | TRAS1#Non-LTR                               | 79.25 | 53 | 40  | 92  |
| mmu-mir-466m_mi0014050_Mus                                           | RF00261;IRES_L-myc;ABXC01001672.1/248-8     | 88.37 | 43 | 42  | 84  |
| mmu-mir-466n_mi0014079_Mus                                           | CR1-18_HM#CR1#Hydra                         | 79.37 | 63 | 2   | 64  |
| mmu-mir-466o_mi0014052_Mus                                           | TRAS1#Non-LTR                               | 87.5  | 40 | 1   | 40  |
| mmu-mir-466p_mi0014078_Mus                                           | TRAS1#Non-LTR                               | 87.5  | 40 | 1   | 40  |
| mmu-mir-466q_mi0018032_Mus                                           | TRAS3_BM#R1#Bombyx                          | 91.11 | 45 | 1   | 45  |
| hsa-mir-4674_mi0017305_Homo_sapiens_miR-4674_stem-loop               | LSU-rRNA_Hsa#rRNA#Metazoa                   | 75    | 56 | 13  | 68  |
| hsa-mir-4677_mi0017308_Homo_sapiens_miR-4677_stem-loop               | RF00230;T-box;FP929055.1/1899931-1900152    | 80    | 40 | 25  | 63  |
| hsa-mir-4679-1_mi0017310_Homo_sapiens_miR-4679-1_stem-loop           | RF01705;Flavo-1;AM398681.1/563089-563169    | 80.95 | 42 | 25  | 65  |
| hsa-mir-4679-2_mi0017311_Homo_sapiens_miR-4679-2_stem-loop           | RF01705;Flavo-1;AM398681.1/563089-563169    | 80.95 | 42 | 12  | 52  |
| mmu-mir-467a-10_mi0014076_Mus                                        | TSESEBEII#Mariner/Tc1#Anopheles             | 80    | 40 | 44  | 83  |
| mmu-mir-467a-2_mi0014053_Mus                                         | TSESEBEII#Mariner/Tc1#Anopheles             | 80    | 40 | 44  | 83  |
| mmu-mir-467a-3_mi0014056_Mus                                         | TSESEBEII#Mariner/Tc1#Anopheles             | 80    | 40 | 44  | 83  |
| mmu-mir-467a-4_mi0014059_Mus                                         | TSESEBEII#Mariner/Tc1#Anopheles             | 80    | 40 | 44  | 83  |
| mmu-mir-467a-5_mi0014062_Mus                                         | TSESEBEII#Mariner/Tc1#Anopheles             | 80    | 40 | 44  | 83  |
| mmu-mir-467a-6_mi0014065_Mus                                         | TSESEBEII#Mariner/Tc1#Anopheles             | 80    | 40 | 44  | 83  |
| mmu-mir-467a-7_mi0014069_Mus                                         | TSESEBEII#Mariner/Tc1#Anopheles             | 80    | 40 | 44  | 83  |
| mmu-mir-467a-8_mi0014072_Mus                                         | TSESEBEII#Mariner/Tc1#Anopheles             | 80    | 40 | 44  | 83  |
| mmu-mir-467a-9_mi0014074_Mus                                         | TSESEBEII#Mariner/Tc1#Anopheles             | 80    | 40 | 44  | 83  |
| hsa-mir-4694_mi0017327_Homo_sapiens_miR-4694_stem-loop               | RF00028;Intron_gpl;HQ287715.1/1-432         | 81.4  | 43 | 35  | 77  |
| hsa-mir-4705_mi0017338_Homo_sapiens_miR-4705_stem-loop               | RF01417;RSV_RNA;ACFV01134535.1/1803-1517    | 80    | 40 | 28  | 67  |
| hsa-mir-4719_mi0017354_Homo_sapiens_miR-4719_stem-loop               | HAT-N9_Mad#DNA                              | 81.4  | 43 | 15  | 55  |
| hsa-mir-4734_mi0017371_Homo_sapiens_miR-4734_stem-loop               | hATw-2_BF#hAT#Branchiostoma                 | 78    | 50 | 1   | 49  |
| hsa-mir-4741_mi0017379_Homo_sapiens_miR-4741_stem-loop               | SETARIA1#DNA                                | 81.4  | 43 | 5   | 47  |



|                                                                           |                                                 |       |    |     |     |
|---------------------------------------------------------------------------|-------------------------------------------------|-------|----|-----|-----|
| hsa-mir-4742_mi0017380_Homo_sapiens_miR-4742_stem-loop                    | Polinton-2_DBi#Polinton#Drosophila              | 80    | 45 | 17  | 60  |
| hsa-mir-4753_mi0017392_Homo_sapiens_miR-4753_stem-loop                    | Gypsy-12_RO-I#Gypsy#Rhizopus                    | 80.95 | 42 | 5   | 46  |
| hsa-mir-4759_mi0017400_Homo_sapiens_miR-4759_stem-loop                    | DNA-6-N2_DR#DNA                                 | 80    | 40 | 21  | 60  |
| hsa-mir-4763_mi0017404_Homo_sapiens_miR-4763_stem-loop                    | Gypsy-30_SP-I#Gypsy#Strongylocentrotus          | 82.93 | 41 | 8   | 46  |
| hsa-mir-4767_mi0017408_Homo_sapiens_miR-4767_stem-loop                    | I_Ele22#I#Aedes                                 | 78    | 50 | 5   | 53  |
| hsa-mir-4773-1_mi0017415_Homo_sapiens_miR-4773-1_stem-loop                | hAT-3N1A_DR#hAT#Danio                           | 78    | 50 | 13  | 61  |
| hsa-mir-4773-2_mi0017416_Homo_sapiens_miR-4773-2_stem-loop                | hAT-3N1A_DR#hAT#Danio                           | 78    | 50 | 18  | 66  |
| ppy-mir-4774_mi0020930_Pongo                                              | Copia-11_Mad-I#Copia#Malus                      | 80    | 40 | 74  | 112 |
| hsa-mir-4777_mi0017421_Homo_sapiens_miR-4777_stem-loop                    | RF00001;5S_rRNA;AFYH01261552.1/9906-9788        | 80    | 40 | 29  | 67  |
| hsa-mir-4785_mi0017430_Homo_sapiens_miR-4785_stem-loop                    | PIF_Harbinger-1_EmiHux#Harbinger#Emiliana       | 80    | 40 | 30  | 69  |
| hsa-mir-4789_mi0017436_Homo_sapiens_miR-4789_stem-loop                    | ENSPM-6_DR#EnSpm#Danio                          | 76    | 50 | 24  | 73  |
| hsa-mir-4792_mi0017439_Homo_sapiens_miR-4792_stem-loop                    | Mariner-3_PGr#Mariner/Tc1#Puccinia              | 80    | 40 | 30  | 66  |
| hsa-mir-4795_mi0017442_Homo_sapiens_miR-4795_stem-loop                    | L2_Ele3#L2#Aedes                                | 82.93 | 41 | 49  | 86  |
| ppy-mir-4798_mi0020922_Pongo                                              | MuDR-13_VV#MuDR#Vitis                           | 73.68 | 57 | 46  | 102 |
| hsa-mir-4799_mi0017446_Homo_sapiens_miR-4799_stem-loop                    | RF00001;5S_rRNA;AGKD01005308.1/23282-23383      | 82.5  | 40 | 18  | 57  |
| hsa-mir-4800_mi0017448_Homo_sapiens_miR-4800_stem-loop                    | DNAREP1_DYak#Helitron#Drosophila                | 80    | 40 | 41  | 80  |
| cel-mir-4805_mi0017535_Caenorhabditis                                     | HAT2_CE#nonautonomous                           | 76.27 | 59 | 27  | 85  |
| nta-MIR482a_mi0020247_Nicotiana                                           | MTIS112A#Harbinger#Medicago                     | 75    | 56 | 42  | 94  |
| csi-MIR482b_mi0016723_Citrus                                              | Ogre-VP1_LTR#Gypsy#Vicia                        | 80.49 | 41 | 29  | 69  |
| sly-MIR482c_mi0020251_Solanum_lycopersicum_miR482c_stem-loop              | Helitron-2_XT                                   | 80    | 40 | 26  | 65  |
| stu-MIR482c_mi0020244_Solanum_tuberosum_miR482c_stem-loop                 | Mariner-N1_CGi#Mariner/Tc1#Crassostrea          | 80.39 | 51 | 53  | 102 |
| pde-MIR482d_mi0022100_Pinus                                               | RF00001;5S_rRNA;AFSP01122046.1/899-790          | 80    | 40 | 68  | 105 |
| stu-MIR482e_mi0020249_Solanum_tuberosum_miR482e_stem-loop                 | Helitron-2_XT                                   | 80    | 40 | 26  | 65  |
| ggo-mir-483_mi0020738_Gorilla                                             | RMER17D_MM#Non-LTR                              | 80.77 | 52 | 60  | 110 |
| sko-mir-4841-2_mi0017588_Saccoglossus_kowalevskii_miR-4841-2_stem-loop    | Gypsy-49_DWil-I#Gypsy#Drosophila                | 80    | 40 | 2   | 41  |
| sko-mir-4845_mi0017592_Saccoglossus_kowalevskii_miR-4845_stem-loop        | Kolobok-N1_HM#Kolobok#Hydra                     | 80    | 40 | 5   | 44  |
| spu-mir-4850_mi0017600_Strongylocentrotus_purpuratus_miR-4850_stem-loop   | CR1-1_DBi#CR1#Drosophila                        | 80.49 | 41 | 3   | 43  |
| bfl-mir-4875b_mi0017639_Branchiostoma                                     | RF01859;Phe_leader;ACCI02000099.1/122515-122398 | 81.4  | 43 | 14  | 52  |
| bfl-mir-4877_mi0017643_Branchiostoma                                      | Gypsy-39_Mad-I#Gypsy#Malus                      | 78    | 50 | 10  | 59  |
| bfl-MIR-4899_mi0017673_Branchiostoma                                      | RF00443;SNORA27;ABEP02003192.1/46934-47070      | 100   | 75 | 12  | 86  |
| ssc-mir-491_mi0017993_Sus_scrofa_miR-491_stem-loop                        | LTR-4_ACar#Gypsy#Anolis                         | 80    | 40 | 32  | 70  |
| dme-mir-4913_mi0017695_Drosophila                                         | REP_DE#Repetitive                               | 80.43 | 46 | 10  | 51  |
| dme-mir-4915_mi0017697_Drosophila                                         | EnSpm-1_AA#DNA                                  | 82.5  | 40 | 68  | 107 |
| cel-mir-4926_mi0017713_Caenorhabditis                                     | RF00028;Intron_gpl;JN088933.1/10-304            | 80    | 40 | 10  | 49  |
| cel-mir-4927_mi0017714_Caenorhabditis                                     | RF00017;Metazoa_SRP;AADC01086547.1/78371-78109  | 81.4  | 43 | 8   | 50  |
| cel-mir-4937_mi0017723_Caenorhabditis                                     | Caenorhabditis_elegans_chrIV.trna7-ArgTCG       | 80.88 | 68 | 10  | 77  |
| FBgn0263573 mir-4942_stem_loop_[Source:FlyBase_gene_name;Acc:FBgn0263573] | hAT-1_DRh#hAT#Drosophila                        | 89.36 | 47 | 531 | 576 |
| FBgn0263520 mir-4945_stem_loop_[Source:FlyBase_gene_name;Acc:FBgn0263520] | Gypsy-26_SP-I#Gypsy#Strongylocentrotus          | 80.43 | 46 | 532 | 577 |
| dme-mir-4950_mi0017736_Drosophila                                         | FERVLTR4d_LTR#ERV1#Takifugu                     | 76.36 | 55 | 11  | 64  |
| dme-mir-4953_mi0017739_Drosophila                                         | RF00028;Intron_gpl;AF229894.1/10-303            | 80.49 | 41 | 22  | 62  |
| dme-mir-4961_mi0017747_Drosophila                                         | RF00261;IRES_L-myc;CABZ01017819.1/7780-7552     | 75.86 | 58 | 21  | 78  |

|                                                                           |                                              |       |     |     |     |
|---------------------------------------------------------------------------|----------------------------------------------|-------|-----|-----|-----|
| dme-mir-4962_mi0017748_Drosophila                                         | Copia-70_Mad-l#Copia#Malus                   | 82.5  | 40  | 8   | 47  |
| FBgn0263519 mir-4964_stem_loop_[Source:FlyBase_gene_name;Acc:FBgn0263519] | REX1-7_XT#Rex1#Xenopus                       | 80.43 | 46  | 540 | 582 |
| dme-mir-4968_mi0017754_Drosophila                                         | TART_DV#Non-LTR                              | 84.75 | 59  | 88  | 146 |
| mmu-mir-496b_mi0021942_Mus                                                | RF00028;Intron_gpl;EF156677.1/5-549          | 80.43 | 46  | 18  | 61  |
| dme-mir-4972_mi0017758_Drosophila                                         | RF00001;5S_rRNA;AFYH01065072.1/14642-14522   | 81.82 | 44  | 22  | 65  |
| dme-mir-4973_mi0017759_Drosophila                                         | Ag-Jock-1#Jockey#Anopheles                   | 83.64 | 55  | 58  | 112 |
| dme-mir-4982_mi0017768_Drosophila                                         | Gypsy-16_DPu-l#Gypsy#Daphnia                 | 76.79 | 56  | 47  | 101 |
| gma-MIR4993_mi0017859_Glycine                                             | GmCOPIA10_l#Copia#Glycine                    | 91.67 | 60  | 11  | 70  |
| gma-MIR4997_mi0017863_Glycine                                             | hAT-7_VV#hAT#Vitis                           | 78    | 50  | 95  | 141 |
| hsa-mir-5003_mi0017869_Homo_sapiens_miR-5003_stem-loop                    | RF01293;ACA59;AAFR03049540.1/35318-35200     | 80    | 45  | 19  | 63  |
| hsa-mir-5007_mi0017874_Homo_sapiens_miR-5007_stem-loop                    | NeSL-1_C11#NeSL#Caenorhabditis               | 80.43 | 46  | 22  | 66  |
| hsa-mir-5008_mi0017876_Homo_sapiens_miR-5008_stem-loop                    | hAT-1_SP#hAT#Strongylocentrotus              | 80    | 40  | 54  | 92  |
| hsa-mir-5009_mi0017877_Homo_sapiens_miR-5009_stem-loop                    | Tigger4a#Mariner/Tc1#Primates                | 90    | 60  | 1   | 60  |
| ath-MIR5015_mi0017883_Arabidopsis                                         | ATCOPIA80_l#Copia#Arabidopsis                | 80.88 | 68  | 1   | 66  |
| ath-MIR5024_mi0017894_Arabidopsis                                         | VIHAT2#hAT#Vitis                             | 73.13 | 67  | 41  | 104 |
| ath-MIR5026_mi0017896_Arabidopsis                                         | ATREP10A#Helitron#Arabidopsis                | 90    | 40  | 56  | 95  |
| ath-MIR5027_mi0017897_Arabidopsis                                         | RF00028;Intron_gpl;EU498212.1/1-336          | 82.93 | 41  | 58  | 98  |
| gma-MIR5035_mi0017908_Glycine                                             | RF00020;U5;AAQR03090135.1/14702-14819        | 80.49 | 41  | 83  | 123 |
| gma-MIR5036_mi0017909_Glycine                                             | EnSpm-1_Mad#EnSpm#Malus                      | 87.5  | 40  | 80  | 118 |
| hvu-MIR5048a_mi0017935_Hordeum                                            | RF00026;U6;AAEX03014782.1/90676-90783        | 80    | 40  | 53  | 92  |
| hvu-MIR5048b_mi0021507_Hordeum                                            | ENSUPMET#EnSpm#Medicago                      | 73.68 | 57  | 54  | 110 |
| bdi-MIR5058_mi0017948_Brachypodium                                        | RF00017;Metazoa_SRP;AEHL01029426.1/1545-1256 | 78.85 | 52  | 23  | 72  |
| bdi-MIR5067_mi0017967_Brachypodium                                        | RF00015;U4;ADDN01001085.1/629437-629602      | 73.26 | 86  | 1   | 86  |
| osa-MIR5072_mi0017943_Oryza                                               | GYPSY-B#LTR                                  | 90.54 | 74  | 4   | 76  |
| osa-MIR5074_mi0017950_Oryza                                               | TRUNCATOR#Gypsy#Oryza                        | 88.46 | 130 | 7   | 136 |
| osa-MIR5078_mi0017966_Oryza                                               | LTR20_EC#ERV1#Equus                          | 82.5  | 40  | 276 | 314 |
| osa-MIR5079_mi0017969_Oryza                                               | Rehavkus-1N1_HR#Rehavkus#Helobdella          | 80.49 | 41  | 109 | 149 |
| osa-MIR5082_mi0017973_Oryza                                               | TguERVk4_LTR1a#ERV2#Estrildidae              | 77.63 | 76  | 31  | 102 |
| osa-MIR5083_mi0017974_Oryza                                               | RF00205;snoR41;AACV01002994.1/9029-9124      | 100   | 96  | 115 | 210 |
| tae-MIR5086_mi0017949_Triticum_aestivum_miR5086_stem-loop                 | Gypsy-57_DEI-l#Gypsy#Drosophila              | 80    | 40  | 32  | 70  |
| hsa-mir-5088_mi0017977_Homo_sapiens_miR-5088_stem-loop                    | RF00100;7SK;AANG01556822.1/827-1151          | 80.49 | 41  | 18  | 58  |
| hsa-mir-5089_mi0017978_Homo_sapiens_miR-5089_stem-loop                    | MuDr-1_HM#MuDR#Hydra                         | 82.93 | 41  | 9   | 45  |
| hsa-mir-5095_mi0018001_Homo_sapiens_miR-5095_stem-loop                    | RF00017;Metazoa_SRP;ABGA01023696.1/6239-5977 | 88.1  | 42  | 2   | 43  |
| hsa-mir-5096_mi0018004_Homo_sapiens_miR-5096_stem-loop                    | RF00017;Metazoa_SRP;AEHK01003994.1/1954-2235 | 94.29 | 70  | 1   | 70  |
| mmu-mir-5097_mi0018005_Mus                                                | Danio_gerio_chr4.trna9193-LysTTT             | 82.26 | 62  | 24  | 80  |
| mmu-mir-5098_mi0018006_Mus                                                | RF00100;7SK;CU406998.9/48140-47823           | 88.1  | 42  | 41  | 82  |
| hsa-mir-5100_mi0019116_Homo_sapiens_miR-5100_stem-loop                    | MIR#SINE2/tRNA#Mammalia                      | 71.95 | 82  | 31  | 112 |
| mmu-mir-5100_mi0018008_Mus                                                | RF00005;tRNA;AAPN01304352.1/33912-33841      | 80.49 | 41  | 14  | 53  |
| mmu-mir-5103_mi0018011_Mus                                                | LTR9_FC#ERV1#Felis                           | 85    | 40  | 4   | 41  |
| mmu-mir-5105_mi0018013_Mus                                                | G2_DM#Jockey#Drosophila                      | 80    | 40  | 21  | 57  |
| sha-mir-5105_mi0019608_Sarcophilus_harrisii_miR-5105_stem-loop            | LSU-rRNA_Hsa#rRNA#Metazoa                    | 83.45 | 139 | 1   | 139 |

|                                                        |                                                |       |     |     |     |
|--------------------------------------------------------|------------------------------------------------|-------|-----|-----|-----|
| mmu-mir-5109_mi0018018_Mus                             | LSU-rRNA_Sce                                   | 88.1  | 42  | 46  | 87  |
| mmu-mir-5112_mi0018021_Mus                             | RF00005;tRNA;CP000512.1/1920321-1920394        | 80.49 | 41  | 7   | 45  |
| mmu-mir-5117_mi0018026_Mus                             | RF00152;SNORD79;AFTD01011934.1/75286-75203     | 94.05 | 84  | 4   | 87  |
| mmu-mir-5118_mi0018027_Mus                             | B1_Mur4                                        | 79.03 | 62  | 5   | 66  |
| mmu-mir-5124a_mi0018035_Mus                            | RF00005;tRNA;AAHY01013480.1/3215-3281          | 80.43 | 46  | 22  | 67  |
| mmu-mir-5124b_mi0021921_Mus                            | RF00005;tRNA;AAHX01080829.1/12331-12404        | 77.78 | 63  | 4   | 66  |
| mmu-mir-5126_mi0018038_Mus                             | Ignicoccus_hospitalis_KIN4_I_chr.trna17-ArgCCG | 80    | 40  | 27  | 64  |
| mmu-mir-5128_mi0018040_Mus                             | RF00015;U4;AAHX01028334.1/65497-65654          | 80.77 | 52  | 33  | 84  |
| mmu-mir-5130_mi0018042_Mus                             | RF00261;IRES_L-myc;CAAK05016015.1/1539-1739    | 74.32 | 74  | 5   | 76  |
| osa-MIR5143b_mi0019834_Oryza                           | RF00410;SNORA2;AAKN02049922.1/49573-49709      | 76.92 | 52  | 138 | 188 |
| osa-MIR5144_mi0018056_Oryza                            | Gypsy-9_DPu-l#Gypsy#Daphnia                    | 80.43 | 46  | 165 | 209 |
| osa-MIR5149_mi0018064_Oryza                            | CLOUD-4#DNA                                    | 85.14 | 74  | 5   | 78  |
| osa-MIR5153_mi0018068_Oryza                            | CLOUD-6#DNA                                    | 92.31 | 208 | 1   | 206 |
| osa-MIR5155_mi0018070_Oryza                            | CR1-38_HM#CR1#Hydra                            | 75    | 60  | 41  | 95  |
| osa-MIR5156_mi0018071_Oryza                            | TUBE2#SINE#Tupaia                              | 80.95 | 42  | 264 | 305 |
| osa-MIR5159_mi0018075_Oryza                            | RF00600;SNORA79;AFTD01046684.1/22369-22511     | 80    | 40  | 17  | 55  |
| osa-MIR5160_mi0018076_Oryza                            | ATCOPIA3LTR#Copia#Arabidopsis                  | 81.25 | 48  | 154 | 199 |
| osa-MIR5162_mi0018078_Oryza                            | RAGYPSY_LTR_MT#LTR                             | 80.49 | 41  | 143 | 180 |
| bdi-MIR5172_mi0018141_Brachypodium                     | RF00062;HgcC;CP002737.1/1665294-1665172        | 81.4  | 43  | 248 | 290 |
| bdi-MIR5175a_mi0018144_Brachypodium                    | RF00015;U4;ADDN01001085.1/629437-629602        | 80.43 | 92  | 23  | 114 |
| bdi-MIR5175b_mi0018146_Brachypodium                    | RF00015;U4;ADDN01001085.1/629437-629602        | 79.78 | 89  | 27  | 115 |
| bdi-MIR5182_mi0018155_Brachypodium                     | VANDAL2N1#MuDR#Arabidopsis                     | 76.79 | 56  | 117 | 169 |
| hsa-mir-5189_mi0018168_Homo_sapiens_miR-5189_stem-loop | Copia-2_PIT-l#Copia#Phytophthora               | 77.59 | 58  | 6   | 61  |
| hsa-mir-5193_mi0018172_Homo_sapiens_miR-5193_stem-loop | DIRS-3_XT                                      | 80    | 45  | 59  | 103 |
| bdi-MIR5199_mi0018231_Brachypodium                     | TguERVK7_l#ERV2#Estrildidae                    | 80    | 40  | 107 | 143 |
| mtr-MIR5205a_mi0018240_Medicago                        | MuDR1_HV#MuDR#Hordeum                          | 80    | 40  | 2   | 41  |
| mtr-MIR5209_mi0018249_Medicago                         | CALYPSHAN_I_MT#Gypsy#Medicago                  | 87.39 | 111 | 1   | 111 |
| mtr-MIR5211_mi0018251_Medicago                         | RF00261;IRES_L-myc;ABXC01003798.1/22-182       | 82.93 | 41  | 42  | 80  |
| mtr-MIR5213_mi0018253_Medicago                         | RF00100;7SK;ABRT010508409.1/876-561            | 77.97 | 59  | 36  | 91  |
| mtr-MIR5216a_mi0018279_Medicago                        | GYPSY-I_MT#GYPSY-I_MT#Medicago                 | 85.25 | 61  | 72  | 132 |
| mtr-MIR5216b_mi0018280_Medicago                        | GYPSY-I_MT#GYPSY-I_MT#Medicago                 | 87.14 | 70  | 90  | 159 |
| mtr-MIR5218_mi0018282_Medicago                         | GYPSY-I_MT#GYPSY-I_MT#Medicago                 | 88.57 | 70  | 1   | 70  |
| mtr-MIR5221_mi0018284_Medicago                         | Penelope-11_XT#Penelope#Xenopus                | 81.4  | 43  | 15  | 57  |
| mtr-MIR5224a_mi0018288_Medicago                        | GYPSY-I_MT#GYPSY-I_MT#Medicago                 | 85.39 | 89  | 24  | 112 |
| mtr-MIR5224b_mi0018291_Medicago                        | GYPSY-I_MT#GYPSY-I_MT#Medicago                 | 82.09 | 67  | 22  | 88  |
| mtr-MIR5226_mi0018290_Medicago                         | RF00028;Intron_gpl;AY328211.1/4-489            | 74.19 | 62  | 3   | 62  |
| mtr-MIR5227_mi0018292_Medicago                         | RF00028;Intron_gpl;GU594573.1/17-544           | 82.93 | 41  | 120 | 158 |
| mtr-MIR5228_mi0018317_Medicago                         | RF00230;T-box;AGHE01000197.1/686-410           | 80.95 | 42  | 43  | 82  |
| mtr-MIR5232_mi0018322_Medicago                         | L1-1_EC#L1#Equus                               | 76.36 | 55  | 56  | 104 |
| mtr-MIR5237_mi0018332_Medicago                         | RF02081;STnc550;CP001120.1/1514461-1514832     | 76.92 | 52  | 98  | 149 |
| mtr-MIR5241c_mi0018342_Medicago                        | Helitron-1_Mad#Helitron#Malus                  | 80    | 40  | 71  | 110 |

|                                   |                                        |       |     |     |     |
|-----------------------------------|----------------------------------------|-------|-----|-----|-----|
| mtr-MIR5243_mi0018344_Medicago    | Helitron-1_Mad#Helitron#Malus          | 78.18 | 55  | 91  | 145 |
| mtr-MIR5248_mi0018349_Medicago    | Helitron-1_Mad#Helitron#Malus          | 86.67 | 45  | 70  | 114 |
| mtr-MIR5249_mi0018350_Medicago    | SHAMUDRA3_MT#MuDR#Medicago             | 88.89 | 45  | 154 | 198 |
| mtr-MIR5250_mi0018351_Medicago    | DEL_LH#Gypsy#Lilium                    | 76.19 | 63  | 17  | 75  |
| mtr-MIR5252_mi0018353_Medicago    | Helitron-1_Mad#Helitron#Malus          | 71.93 | 57  | 6   | 62  |
| mtr-MIR5256_mi0018358_Medicago    | RF00028;Intron_gpl;AF482637.1/1-449    | 76    | 50  | 10  | 59  |
| mtr-MIR5257_mi0018361_Medicago    | CR1-29_HM#CR1#Hydra                    | 76.47 | 51  | 30  | 79  |
| mtr-MIR5261_mi0018365_Medicago    | Helitron-2_Mad#Helitron#Malus          | 80.95 | 42  | 25  | 66  |
| mtr-MIR5263_mi0018367_Medicago    | MUDRAV_MT#DNA                          | 80.95 | 63  | 41  | 103 |
| mtr-MIR5264_mi0018376_Medicago    | Sola1-11_AP#Sola#Acyrtosiphon          | 80    | 40  | 34  | 72  |
| mtr-MIR5265_mi0018377_Medicago    | RF00019;Y_RNA;ADFV01132639.1/2388-2482 | 73.58 | 53  | 3   | 52  |
| mtr-MIR5268a_mi0018394_Medicago   | HERA#Helitron#Medicago                 | 99.11 | 112 | 1   | 112 |
| mtr-MIR5268b_mi0018395_Medicago   | HERA#Helitron#Medicago                 | 99.11 | 112 | 1   | 112 |
| mtr-MIR5271e_mi0018404_Medicago   | HAT-7N1_Mad#hAT#Malus                  | 75    | 52  | 1   | 51  |
| mtr-MIR5272a_mi0018405_Medicago   | MtPH-M-I-Ia#Harbinger#Medicago         | 94.37 | 71  | 5   | 75  |
| mtr-MIR5272b_mi0018406_Medicago   | MtPH-M-I-Ia#Harbinger#Medicago         | 90.82 | 98  | 1   | 98  |
| mtr-MIR5272c_mi0018407_Medicago   | MtPH-M-I-Ia#Harbinger#Medicago         | 89.71 | 68  | 7   | 74  |
| mtr-MIR5272d_mi0018408_Medicago   | MtPH-M-I-Ia#Harbinger#Medicago         | 89.55 | 67  | 8   | 74  |
| mtr-MIR5272e_mi0018409_Medicago   | MtPH-M-I-Ia#Harbinger#Medicago         | 89.71 | 68  | 7   | 74  |
| mtr-MIR5272f_mi0018410_Medicago   | MtPH-M-I-Ia#Harbinger#Medicago         | 95.52 | 67  | 1   | 67  |
| mtr-MIR5273_mi0018411_Medicago    | RAM13_LTR_MT#Copia#Medicago            | 92.86 | 70  | 9   | 78  |
| mtr-MIR5279_mi0018421_Medicago    | SHATAG_MT#hAT#Medicago                 | 96.43 | 84  | 1   | 84  |
| bdi-MIR528_mi0018087_Brachypodium | DIRS-8_ACar#DIRS#Anolis                | 77.36 | 53  | 25  | 76  |
| mtr-MIR5280_mi0018422_Medicago    | ATHPOGON2#Mariner/Tc1#Arabidopsis      | 80    | 45  | 59  | 100 |
| mtr-MIR5281a_mi0018423_Medicago   | Mariner-2N2_XT#Mariner/Tc1#Xenopus     | 73.44 | 64  | 81  | 137 |
| mtr-MIR5281e_mi0018427_Medicago   | DNA4-1_AP#DNA                          | 72.73 | 55  | 26  | 80  |
| mtr-MIR5283_mi0018430_Medicago    | RF00230;T-box;CP000413.1/495563-495734 | 80    | 40  | 28  | 67  |
| mtr-MIR5286b_mi0018455_Medicago   | RF00100;7SK;AABR05075070.1/30899-31258 | 82.93 | 41  | 52  | 91  |
| mtr-MIR5287a_mi0018450_Medicago   | DNA8-100_AP#DNA                        | 81.25 | 48  | 82  | 129 |
| mtr-MIR5287b_mi0018451_Medicago   | En/Spm1_HV#DNA                         | 80.95 | 42  | 48  | 88  |
| mtr-MIR5289a_mi0018453_Medicago   | MuSHAN_MT#MuDR#Medicago                | 86.54 | 52  | 31  | 82  |
| mtr-MIR5289b_mi0018454_Medicago   | MuSHAN_MT#MuDR#Medicago                | 80    | 45  | 1   | 44  |
| mtr-MIR5291a_mi0018457_Medicago   | RF00028;Intron_gpl;AY098639.1/6-303    | 83.33 | 42  | 15  | 55  |
| mtr-MIR5291b_mi0018458_Medicago   | RF00028;Intron_gpl;AY098639.1/6-303    | 80.95 | 42  | 15  | 55  |
| mtr-MIR5291c_mi0018459_Medicago   | RF00028;Intron_gpl;AY098639.1/6-303    | 80.95 | 42  | 15  | 55  |
| mtr-MIR5292a_mi0018460_Medicago   | Ogre-PT2_LTR#Gypsy#Populus             | 82.5  | 40  | 12  | 50  |
| mtr-MIR5298a_mi0018472_Medicago   | ShaMUDRAV2_MT#MuDR#Medicago            | 91.11 | 45  | 41  | 85  |
| mtr-MIR5298b_mi0018473_Medicago   | ShaMUDRAV2_MT#MuDR#Medicago            | 73.42 | 79  | 1   | 68  |
| mtr-MIR5298c_mi0018474_Medicago   | ShaMUDRAV2_MT#MuDR#Medicago            | 91.11 | 45  | 39  | 83  |
| mtr-MIR5298d_mi0018475_Medicago   | ShaMUDRAV2_MT#MuDR#Medicago            | 84.06 | 69  | 1   | 69  |
| mtr-MIR5299_mi0018476_Medicago    | METMAR1#Mariner/Tc1#Medicago           | 72.06 | 68  | 16  | 82  |

|                                                                   |                                                  |       |    |     |     |
|-------------------------------------------------------------------|--------------------------------------------------|-------|----|-----|-----|
| mtr-MIR530_mi0019701_Medicago                                     | ATREP19#ATREP19#Arabidopsis                      | 83.72 | 43 | 65  | 107 |
| sly-MIR5300_mi0018477_Solanum_lycopersicum_miR5300_stem-loop      | Gypsy-35_BD-l#Gypsy#Brachypodium                 | 80.95 | 42 | 67  | 108 |
| sly-MIR5302_mi0018479_Solanum_lycopersicum_miR5302_stem-loop      | RF00017;Metazoa_SRP;ACFV01039045.1/11053-10792   | 88.1  | 42 | 101 | 142 |
| sly-MIR5304_mi0018481_Solanum_lycopersicum_miR5304_stem-loop      | RTE-1_STu#RTE#Solanum                            | 74.19 | 62 | 64  | 125 |
| gma-MIR530a_mi0017852_Glycine                                     | RF00028;Intron_gpl;AY015402.1/1-534              | 80.77 | 52 | 54  | 104 |
| isc-mir-5310_mi0018490_Ixodes                                     | L1-1_XT#L1#Xenopus                               | 80.43 | 46 | 42  | 87  |
| rmi-mir-5322_mi0018504_Rhipicephalus_microplus_miR-5322_stem-loop | Gypsy-2_CP-l#Gypsy#Carica                        | 80.95 | 42 | 64  | 104 |
| rmi-mir-5329_mi0018511_Rhipicephalus_microplus_miR-5329_stem-loop | Gypsy14-NVi_l#Gypsy#Nasonia                      | 75    | 56 | 20  | 69  |
| osa-MIR5337a_mi0018519_Oryza                                      | RF00028;Intron_gpl;AF135082.1/5-278              | 76.47 | 51 | 99  | 149 |
| csi-MIR535_mi0016726_Citrus                                       | HAL1C#L1#Homo                                    | 80.49 | 41 | 33  | 73  |
| gma-MIR5377_mi0018636_Glycine                                     | RF00545;snopsi18S-841;AAGW02022956.1/10408-10267 | 80.95 | 42 | 50  | 90  |
| gma-MIR5379_mi0018638_Glycine                                     | ERVB4_5-l_RN#Endogenous                          | 77.97 | 59 | 55  | 112 |
| gma-MIR5380a_mi0018639_Glycine                                    | RF00028;Intron_gpl;AY306705.1/1-262              | 75.47 | 53 | 25  | 77  |
| sbi-MIR5381_mi0018688_Sorghum_bicolor_miR5381_stem-loop           | MuDR-3_SBi#MuDR#Sorghum                          | 85.45 | 55 | 16  | 70  |
| sbi-MIR5384_mi0018691_Sorghum_bicolor_miR5384_stem-loop           | Copia-129_SB-l#Copia#Sorghum                     | 95.18 | 83 | 14  | 95  |
| sbi-MIR5387a_mi0018694_Sorghum_bicolor_miR5387_stem-loop          | En/Spm1_HV#DNA                                   | 81.82 | 44 | 65  | 108 |
| sbi-MIR5387b_mi0019104_Sorghum_bicolor_miR5387b_stem-loop         | EnSpm2_SB#EnSpm#Sorghum                          | 88.64 | 44 | 66  | 109 |
| sbi-MIR5388_mi0018695_Sorghum_bicolor_miR5388_stem-loop           | EnSpm-N37_SBi#EnSpm#Sorghum                      | 79.63 | 54 | 35  | 88  |
| aca-mir-5401_mi0018903_Anolis                                     | RF02164;PVT1_1;ABRQ01213433.1/1320-1511          | 83.33 | 42 | 1   | 42  |
| aca-mir-5420_mi0018923_Anolis                                     | RF01413;AAVX01631682.1/82-171                    | 81.13 | 53 | 10  | 62  |
| aca-mir-5432_mi0018935_Anolis                                     | Equus_caballus_chr1.trna90-TyrGTA                | 80    | 45 | 6   | 50  |
| oar-mir-544_mi0016943_Ovis                                        | MER5A#Repetitive                                 | 82.69 | 52 | 50  | 101 |
| aca-mir-5443_mi0018946_Anolis                                     | Eulor7#Transposable                              | 72    | 75 | 6   | 80  |
| ssc-mir-545_mi0017994_Sus_scrofa_miR-545_stem-loop                | RF00409;SNORA7;AAPN01322891.1/3728-3874          | 82.98 | 47 | 2   | 47  |
| aca-mir-5453_mi0018958_Anolis                                     | DNA-6_ACar#DNA                                   | 85.37 | 41 | 1   | 39  |
| pti-MIR5473_mi0018991_Phaeodactylum                               | RF00100;7SK;ABRT010957304.1/516-163              | 80.49 | 41 | 58  | 95  |
| pti-MIR5476_mi0018994_Phaeodactylum                               | Gypsy15-l_CR#Gypsy#Chlamydomonas                 | 75.47 | 53 | 19  | 71  |
| pti-MIR5477_mi0018995_Phaeodactylum                               | MuDR-4_Mad#MuDR#Malus                            | 80    | 40 | 56  | 95  |
| osa-MIR5489_mi0019007_Oryza                                       | RF02105;DLEU2_1;AAHX01083320.1/7095-7206         | 80    | 40 | 128 | 166 |
| ggo-mir-548a_mi0020826_Gorilla                                    | RF00017;Metazoa_SRP;AGCE01058716.1/2270-2496     | 80.95 | 84 | 13  | 96  |
| ppy-mir-548a_mi0020921_Pongo                                      | RF00017;Metazoa_SRP;AGCE01058716.1/2270-2496     | 79.79 | 94 | 13  | 106 |
| hsa-mir-548aa-1_mi0016689_Homo_sapiens_miR-548aa-1_stem-loop      | MADE1#Mariner/Tc1#Homo                           | 85.14 | 74 | 12  | 85  |
| hsa-mir-548aa-2_mi0016690_Homo_sapiens_miR-548aa-2_stem-loop      | MADE1#Mariner/Tc1#Homo                           | 87.5  | 80 | 6   | 85  |
| hsa-mir-548ab_mi0016752_Homo_sapiens_miR-548ab_stem-loop          | MADE1#Mariner/Tc1#Homo                           | 78.05 | 82 | 3   | 84  |
| hsa-mir-548ac_mi0016762_Homo_sapiens_miR-548ac_stem-loop          | MARINER1#Mariner/Tc1#Eutheria                    | 90    | 40 | 45  | 84  |
| hsa-mir-548ad_mi0016770_Homo_sapiens_miR-548ad_stem-loop          | MADE1#Mariner/Tc1#Homo                           | 82.93 | 82 | 4   | 79  |
| hsa-mir-548ae-1_mi0016779_Homo_sapiens_miR-548ae-1_stem-loop      | MADE1#Mariner/Tc1#Homo                           | 87.23 | 47 | 19  | 61  |
| hsa-mir-548ae-2_mi0016780_Homo_sapiens_miR-548ae-2_stem-loop      | MADE1#Mariner/Tc1#Homo                           | 85    | 60 | 2   | 61  |
| hsa-mir-548ag-1_mi0016793_Homo_sapiens_miR-548ag-1_stem-loop      | MADE1#Mariner/Tc1#Homo                           | 81.82 | 66 | 1   | 66  |
| hsa-mir-548ag-2_mi0016794_Homo_sapiens_miR-548ag-2_stem-loop      | MADE1#Mariner/Tc1#Homo                           | 87.1  | 62 | 1   | 62  |
| hsa-mir-548ah_mi0016796_Homo_sapiens_miR-548ah_stem-loop          | MADE1#Mariner/Tc1#Homo                           | 83.33 | 72 | 1   | 72  |

|                                                              |                                              |       |    |     |     |
|--------------------------------------------------------------|----------------------------------------------|-------|----|-----|-----|
| hsa-mir-548ai_mi0016813_Homo_sapiens_miR-548ai_stem-loop     | MADE1#Mariner/Tc1#Homo                       | 84.34 | 83 | 4   | 85  |
| hsa-mir-548aj-1_mi0016814_Homo_sapiens_miR-548aj-1_stem-loop | MADE1#Mariner/Tc1#Homo                       | 88.89 | 63 | 2   | 64  |
| hsa-mir-548aj-2_mi0016815_Homo_sapiens_miR-548aj-2_stem-loop | MARINER1#Mariner/Tc1#Eutheria                | 87.5  | 40 | 47  | 86  |
| hsa-mir-548ak_mi0016840_Homo_sapiens_miR-548ak_stem-loop     | MADE1#Mariner/Tc1#Homo                       | 82.54 | 63 | 1   | 56  |
| hsa-mir-548al_mi0016851_Homo_sapiens_miR-548al_stem-loop     | MADE1#Mariner/Tc1#Homo                       | 89.36 | 47 | 46  | 92  |
| hsa-mir-548am_mi0016904_Homo_sapiens_miR-548am_stem-loop     | MADE1#Mariner/Tc1#Homo                       | 90.14 | 71 | 2   | 72  |
| hsa-mir-548an_mi0016907_Homo_sapiens_miR-548an_stem-loop     | MADE1#Mariner/Tc1#Homo                       | 86.25 | 80 | 3   | 82  |
| hsa-mir-548ao_mi0017871_Homo_sapiens_miR-548ao_stem-loop     | MADE1#Mariner/Tc1#Homo                       | 83.75 | 80 | 9   | 88  |
| hsa-mir-548ap_mi0017875_Homo_sapiens_miR-548ap_stem-loop     | MADE1#Mariner/Tc1#Homo                       | 88.06 | 67 | 10  | 76  |
| hsa-mir-548aq_mi0019130_Homo_sapiens_miR-548aq_stem-loop     | MADE1#Mariner/Tc1#Homo                       | 84.21 | 57 | 2   | 58  |
| hsa-mir-548ar_mi0019131_Homo_sapiens_miR-548ar_stem-loop     | MADE1#Mariner/Tc1#Homo                       | 81.03 | 58 | 1   | 57  |
| hsa-mir-548as_mi0019132_Homo_sapiens_miR-548as_stem-loop     | MADE1#Mariner/Tc1#Homo                       | 86.27 | 51 | 1   | 51  |
| hsa-mir-548at_mi0019137_Homo_sapiens_miR-548at_stem-loop     | MADE1#Mariner/Tc1#Homo                       | 80.7  | 57 | 1   | 57  |
| hsa-mir-548au_mi0019145_Homo_sapiens_miR-548au_stem-loop     | MADE1#Mariner/Tc1#Homo                       | 77.42 | 62 | 1   | 53  |
| hsa-mir-548av_mi0019152_Homo_sapiens_miR-548av_stem-loop     | MADE1#Mariner/Tc1#Homo                       | 78.13 | 64 | 1   | 62  |
| hsa-mir-548aw_mi0019283_Homo_sapiens_miR-548aw_stem-loop     | MADE1#Mariner/Tc1#Homo                       | 85    | 40 | 1   | 40  |
| hsa-mir-548ax_mi0019286_Homo_sapiens_miR-548ax_stem-loop     | MADE1#Mariner/Tc1#Homo                       | 91.67 | 72 | 3   | 73  |
| hsa-mir-548ay_mi0022210_Homo_sapiens_miR-548ay_stem-loop     | MADE1#Mariner/Tc1#Homo                       | 86.08 | 79 | 17  | 94  |
| hsa-mir-548az_mi0022212_Homo_sapiens_miR-548az_stem-loop     | MARINER1#Mariner/Tc1#Eutheria                | 90    | 40 | 49  | 88  |
| ggo-mir-548b_mi0020808_Gorilla                               | RF00017;Metazoa_SRP;AGCE01058716.1/2270-2496 | 77.55 | 98 | 14  | 110 |
| ggo-mir-548c_mi0020814_Gorilla                               | MARINER1#Mariner/Tc1#Eutheria                | 87.5  | 40 | 48  | 87  |
| ppy-mir-548c_mi0020927_Pongo                                 | MARINER1#Mariner/Tc1#Eutheria                | 87.5  | 40 | 48  | 87  |
| ggo-mir-548d_mi0020836_Gorilla                               | RF00017;Metazoa_SRP;AGCE01058716.1/2270-2496 | 82.76 | 87 | 6   | 92  |
| ggo-mir-548e_mi0020824_Gorilla                               | RF00017;Metazoa_SRP;AGCE01058716.1/2270-2496 | 80.46 | 87 | 20  | 104 |
| ppy-mir-548e_mi0020909_Pongo                                 | RF00017;Metazoa_SRP;AGCE01058716.1/2270-2496 | 74.73 | 91 | 19  | 105 |
| ptr-mir-548e_mi0020604_Pan_troglodytes_miR-548e_stem-loop    | MADE1#Mariner/Tc1#Homo                       | 82.05 | 78 | 22  | 99  |
| ggo-mir-548f_mi0020842_Gorilla                               | RF00017;Metazoa_SRP;AGCE01058716.1/2270-2496 | 76.47 | 85 | 7   | 90  |
| ppy-mir-548f_mi0020926_Pongo                                 | RF00017;Metazoa_SRP;AGCE01058716.1/2270-2496 | 79.55 | 88 | 20  | 107 |
| ppy-mir-548h_mi0020925_Pongo                                 | RF00017;Metazoa_SRP;AGCE01058716.1/2270-2496 | 79.31 | 87 | 16  | 102 |
| hsa-mir-548h-5_mi0016751_Homo_sapiens_miR-548h-5_stem-loop   | MADE1#Mariner/Tc1#Homo                       | 83.05 | 59 | 2   | 60  |
| ptr-mir-548o_mi0020601_Pan_troglodytes_miR-548o_stem-loop    | MARINER1#Mariner/Tc1#Eutheria                | 92.5  | 40 | 21  | 60  |
| hsa-mir-548o-2_mi0016746_Homo_sapiens_miR-548o-2_stem-loop   | MADE1#Mariner/Tc1#Homo                       | 91.3  | 69 | 1   | 69  |
| hsa-mir-548x-2_mi0016833_Homo_sapiens_miR-548x-2_stem-loop   | MARINER1#Mariner/Tc1#Eutheria                | 90    | 40 | 11  | 50  |
| hsa-mir-548y_mi0016595_Homo_sapiens_miR-548y_stem-loop       | MADE1#Mariner/Tc1#Homo                       | 84.81 | 79 | 11  | 89  |
| hsa-mir-548z_mi0016688_Homo_sapiens_miR-548z_stem-loop       | MADE1#Mariner/Tc1#Homo                       | 86.84 | 76 | 10  | 85  |
| osa-MIR5493_mi0019011_Oryza                                  | 7SL                                          | 81.4  | 43 | 210 | 252 |
| osa-MIR5498_mi0019016_Oryza                                  | RIRE3_I#Gypsy#Oryza                          | 71.93 | 57 | 89  | 145 |
| osa-MIR5502_mi0019020_Oryza                                  | RETRO2_I#Gypsy#Oryza                         | 89.89 | 89 | 1   | 88  |
| osa-MIR5508_mi0019026_Oryza                                  | RTE-1_AC_1#RTE#Anolis                        | 81.4  | 43 | 97  | 139 |
| osa-MIR5509_mi0019027_Oryza                                  | RF01705;Flavo-1;AEIH01000082.1/16535-16462   | 80.49 | 41 | 139 | 178 |
| osa-MIR5512a_mi0019030_Oryza                                 | RF00028;Intron_gpl;FJ404989.1/4-531          | 75.41 | 61 | 4   | 64  |

|                                                             |                                              |       |     |     |     |
|-------------------------------------------------------------|----------------------------------------------|-------|-----|-----|-----|
| osa-MIR5512b_mi0021599_Oryza                                | RF00028;Intron_gpl;FJ404989.1/4-531          | 75.41 | 61  | 72  | 132 |
| osa-MIR5526_mi0019046_Oryza                                 | CACTA-B#DNA                                  | 77.97 | 59  | 126 | 182 |
| osa-MIR5529_mi0019049_Oryza                                 | L1-25_XT#L1#Xenopus                          | 75.93 | 54  | 2   | 55  |
| osa-MIR5535_mi0019056_Oryza                                 | L1-24C_ACar#L1#Anolis                        | 82.93 | 41  | 79  | 119 |
| osa-MIR5544_mi0019065_Oryza                                 | Copia13-VV_I#Copia#Vitis                     | 80    | 40  | 141 | 179 |
| cel-mir-5545_mi0019066_Caenorhabditis                       | CELE14A#DNA                                  | 86.67 | 45  | 59  | 102 |
| cel-mir-5548_mi0019069_Caenorhabditis                       | MARINER4_CB#Mariner/Tc1#Caenorhabditis       | 84.31 | 51  | 60  | 110 |
| cel-mir-5549_mi0019070_Caenorhabditis                       | hAT-N7_ACar#hAT#Anolis                       | 80.95 | 42  | 65  | 106 |
| mtr-MIR5557_mi0019083_Medicago                              | Gypsy-112_AA-I#Gypsy#Aedes                   | 80    | 40  | 109 | 145 |
| mtr-MIR5561_mi0019089_Medicago                              | RF00020;U5;AAAB01008966.1/3279340-3279458    | 82.5  | 40  | 15  | 53  |
| sbi-MIR5565a_mi0019107_Sorghum_bicolor_miR5565a_stem-loop   | Helitron-N11_SBi#Helitron#Sorghum            | 70.27 | 111 | 1   | 109 |
| sbi-MIR5565b_mi0019108_Sorghum_bicolor_miR5565b_stem-loop   | Helitron-N11_SBi#Helitron#Sorghum            | 70.27 | 111 | 1   | 109 |
| sbi-MIR5565c_mi0019102_Sorghum_bicolor_miR5565c_stem-loop   | Helitron-N11_SBi#Helitron#Sorghum            | 70.37 | 108 | 3   | 105 |
| sbi-MIR5565d_mi0019109_Sorghum_bicolor_miR5565d_stem-loop   | Helitron-N11_SBi#Helitron#Sorghum            | 72.9  | 107 | 1   | 105 |
| sbi-MIR5565e_mi0019098_Sorghum_bicolor_miR5565e_stem-loop   | Helitron-N11_SBi#Helitron#Sorghum            | 78.1  | 137 | 16  | 150 |
| sbi-MIR5565g_mi0023511_Sorghum_bicolor_miR5565g_stem-loop   | Helitron-N11_SBi#Helitron#Sorghum            | 72.73 | 66  | 1   | 66  |
| sbi-MIR5566_mi0019100_Sorghum_bicolor_miR5566_stem-loop     |                                              | 96.08 | 51  | 51  | 101 |
| sbi-MIR5567_mi0019101_Sorghum_bicolor_miR5567_stem-loop     | CANDYSTRIFE1#EnSpm#Sorghum                   | 85.85 | 106 | 107 | 212 |
| sbi-MIR5568a_mi0019103_Sorghum_bicolor_miR5568_stem-loop    | STOWAWAY1_SB#DNA                             | 83.93 | 56  | 7   | 62  |
| sbi-MIR5568b_mi0023512_Sorghum_bicolor_miR5568b_stem-loop   | STOWAWAY1_SB#DNA                             | 87.1  | 62  | 30  | 91  |
| sbi-MIR5568c_mi0023513_Sorghum_bicolor_miR5568c_stem-loop   | STOWAWAY1_SB#DNA                             | 85    | 60  | 93  | 152 |
| sbi-MIR5568d_mi0023524_Sorghum_bicolor_miR5568d_stem-loop   | Helitron-N13_SBi#Helitron#Sorghum            | 85.71 | 63  | 12  | 74  |
| sbi-MIR5568e_mi0023532_Sorghum_bicolor_miR5568e_stem-loop   | STOWAWAY1_SB#DNA                             | 87.8  | 41  | 11  | 51  |
| sbi-MIR5568f_mi0023534_Sorghum_bicolor_miR5568f_stem-loop   | Helitron-N13_SBi#Helitron#Sorghum            | 87.8  | 41  | 12  | 52  |
| sbi-MIR5568g_mi0023506_Sorghum_bicolor_miR5568g_stem-loop   | Helitron-N13_SBi#Helitron#Sorghum            | 81.65 | 109 | 44  | 152 |
| sbi-MIR5569_mi0019105_Sorghum_bicolor_miR5569_stem-loop     | MUDR1N_SB#MuDR#Sorghum                       | 87.85 | 107 | 108 | 214 |
| rgl-MIR5576_mi0019121_Rehmannia_glutinosa_miR5576_stem-loop | CR1-2_IS#CR1#Ixodes                          | 76    | 50  | 39  | 86  |
| hsa-mir-5588_mi0019147_Homo_sapiens_miR-5588_stem-loop      | Copia-47_BG-I#Copia#Blumeria                 | 85    | 40  | 7   | 44  |
| hsa-mir-5589_mi0019148_Homo_sapiens_miR-5589_stem-loop      | MER91A#DNA                                   | 84.78 | 46  | 6   | 51  |
| cin-mir-5598_mi0019162_Ciona                                | unannotated_repeat_36                        | 96.61 | 59  | 1   | 59  |
| cin-mir-5609_mi0019175_Ciona                                | unannotated_repeat_36                        | 91.3  | 46  | 9   | 54  |
| ENSMUSG00000093498 mmu-mir-5615-2                           | B2#SINE#Mus                                  | 91.6  | 119 | 559 | 677 |
| mmu-mir-5622_mi0019190_Mus                                  | RF00017;Metazoa_SRP;ABGA01059849.1/6431-6152 | 81.4  | 43  | 18  | 60  |
| ath-MIR5628_mi0019199_Arabidopsis                           | COP10_I_MT#Copia#Medicago                    | 82.5  | 40  | 47  | 84  |
| ath-MIR5629_mi0019200_Arabidopsis                           | ATMU2#MuDR#Arabidopsis                       | 89.09 | 55  | 1   | 55  |
| ath-MIR5631_mi0019202_Arabidopsis                           | hAT-N4_AP#hAT#Acyrtosiphon                   | 78.85 | 52  | 73  | 123 |
| ath-MIR5633_mi0019205_Arabidopsis                           | ATCOPIA28_I#Copia#Arabidopsis                | 82.5  | 80  | 278 | 356 |
| ath-MIR5635a_mi0019207_Arabidopsis                          | ATMU3N1#MuDR#Arabidopsis                     | 97.19 | 427 | 16  | 442 |
| ath-MIR5635b_mi0019229_Arabidopsis                          | ATMU3N1#MuDR#Arabidopsis                     | 96.7  | 182 | 1   | 182 |
| ath-MIR5635c_mi0019239_Arabidopsis                          | ATMU3N1#MuDR#Arabidopsis                     | 97.7  | 174 | 1   | 174 |
| ath-MIR5635d_mi0019217_Arabidopsis                          | ATMU3N1#MuDR#Arabidopsis                     | 97.47 | 237 | 1   | 237 |

|                                                              |                                                  |       |     |     |     |
|--------------------------------------------------------------|--------------------------------------------------|-------|-----|-----|-----|
| ath-MIR5637_mi0019209_Arabidopsis                            | MUDRAVI1#MuDR#Vitis                              | 78    | 50  | 23  | 71  |
| ath-MIR5638a_mi0019210_Arabidopsis                           | ATHAT1#hAT#Arabidopsis                           | 77.19 | 57  | 206 | 262 |
| ath-MIR5638b_mi0019219_Arabidopsis                           | ATHAT1#hAT#Arabidopsis                           | 77.97 | 59  | 211 | 269 |
| ath-MIR5641_mi0019214_Arabidopsis                            | ATMU6#MuDR#Arabidopsis                           | 83.33 | 42  | 449 | 490 |
| ath-MIR5642b_mi0019246_Arabidopsis                           | RF00410;SNORA2;AERX01043863.2/28505-28640        | 83.33 | 42  | 141 | 181 |
| ath-MIR5643a_mi0019216_Arabidopsis                           | COLAR12#Satellite#Arabidopsis                    | 86.59 | 82  | 1   | 82  |
| ath-MIR5643b_mi0019256_Arabidopsis                           | COLAR12#Satellite#Arabidopsis                    | 87.8  | 82  | 1   | 82  |
| ath-MIR5645a_mi0019220_Arabidopsis                           | ATMU10#MuDR#Arabidopsis                          | 85.71 | 70  | 376 | 445 |
| ath-MIR5645b_mi0019221_Arabidopsis                           | ATMU10#MuDR#Arabidopsis                          | 84.78 | 92  | 403 | 494 |
| ath-MIR5645c_mi0019225_Arabidopsis                           | ATMU10#MuDR#Arabidopsis                          | 85.23 | 88  | 9   | 94  |
| ath-MIR5645d_mi0019244_Arabidopsis                           | ATMU10#MuDR#Arabidopsis                          | 87.27 | 55  | 8   | 62  |
| ath-MIR5645e_mi0019257_Arabidopsis                           | ATMU10#MuDR#Arabidopsis                          | 85.19 | 54  | 1   | 54  |
| ath-MIR5645f_mi0019252_Arabidopsis                           | ATMU10#MuDR#Arabidopsis                          | 83.16 | 95  | 2   | 96  |
| ath-MIR5646_mi0019222_Arabidopsis                            | AtSB4#SINE#Arabidopsis                           | 85.51 | 69  | 5   | 70  |
| ath-MIR5649a_mi0019226_Arabidopsis                           | MUMT#MuDR#Medicago                               | 76.79 | 56  | 29  | 82  |
| ath-MIR5649b_mi0019248_Arabidopsis                           | MUMT#MuDR#Medicago                               | 76.79 | 56  | 20  | 73  |
| ath-MIR5651_mi0019233_Arabidopsis                            | ATHPOGO#Mariner/Tc1#Arabidopsis                  | 83.72 | 43  | 60  | 101 |
| ath-MIR5653_mi0019236_Arabidopsis                            | SIMPLEHAT2#MSAT#Arabidopsis                      | 96.15 | 78  | 7   | 84  |
| ath-MIR5655_mi0019238_Arabidopsis                            | Outcast#Outcast#Anopheles                        | 85    | 40  | 352 | 390 |
| ath-MIR5660_mi0019245_Arabidopsis                            | ATCOPIA95LTR#Copia#Arabidopsis                   | 94.94 | 79  | 85  | 163 |
| ath-MIR5665_mi0019254_Arabidopsis                            | VANDAL18NB#MuDR#Arabidopsis                      | 92.01 | 463 | 8   | 470 |
| gma-MIR5670_mi0019264_Glycine                                | Copia-51_VV-I#Copia#Vitis                        | 80    | 40  | 41  | 80  |
| gma-MIR5676_mi0019274_Glycine                                | GmOgre_I#Gypsy#Glycine                           | 74.73 | 91  | 1   | 91  |
| gma-MIR5678_mi0019278_Glycine                                | RF00105;SNORD115;ABRT010427243.1/3655-3577       | 80    | 55  | 177 | 231 |
| hsa-mir-5683_mi0019284_Homo_sapiens_miR-5683_stem-loop       | MER5A1#hAT#Eutheria                              | 72.73 | 77  | 1   | 76  |
| hsa-mir-5684_mi0019285_Homo_sapiens_miR-5684_stem-loop       | RF00017;Metazoa_SRP;ABSL01067313.1/14396-14623   | 81.25 | 64  | 2   | 65  |
| hsa-mir-5686_mi0019290_Homo_sapiens_miR-5686_stem-loop       | TACAA@1                                          | 89.09 | 55  | 24  | 78  |
| hsa-mir-5689_mi0019294_Homo_sapiens_miR-5689_stem-loop       | RF00017;Metazoa_SRP;AEHK01157325.1/14634-14349   | 86.05 | 43  | 4   | 46  |
| hsa-mir-5692c-1_mi0019288_Homo_sapiens_miR-5692c-1_stem-loop | SATR2#SAT#Homo                                   | 83.93 | 56  | 16  | 71  |
| hsa-mir-5692c-2_mi0019289_Homo_sapiens_miR-5692c-2_stem-loop | SATR2#SAT#Homo                                   | 81.33 | 75  | 2   | 76  |
| hsa-mir-5695_mi0019302_Homo_sapiens_miR-5695_stem-loop       | MER39B#LTR#Homo                                  | 92    | 50  | 1   | 50  |
| hsa-mir-5697_mi0019304_Homo_sapiens_miR-5697_stem-loop       | HAL1#L1#Eutheria                                 | 80.95 | 42  | 1   | 42  |
| hsa-mir-5699_mi0019306_Homo_sapiens_miR-5699_stem-loop       | RF00100;7SK;AANU01195481.1/38752-39111           | 80.49 | 41  | 32  | 72  |
| hsa-mir-5701-1_mi0019308_Homo_sapiens_miR-5701-1_stem-loop   | REP522#Satellite#Primates                        | 87.8  | 82  | 1   | 82  |
| hsa-mir-5701-2_mi0019593_Homo_sapiens_miR-5701-2_stem-loop   | REP522#Satellite#Primates                        | 87.8  | 82  | 1   | 82  |
| hsa-mir-5704_mi0019312_Homo_sapiens_miR-5704_stem-loop       | RF02005;group-II-D1D4-6;AASZ01002480.1/2141-2390 | 82.93 | 41  | 8   | 48  |
| hsa-mir-5706_mi0019314_Homo_sapiens_miR-5706_stem-loop       | TIGGER1#Mariner/Tc1#Homo                         | 84.91 | 53  | 1   | 53  |
| hsa-mir-5708_mi0019316_Homo_sapiens_miR-5708_stem-loop       | RF00017;Metazoa_SRP;ADFV01010003.1/889-642       | 86.36 | 44  | 43  | 85  |
| bra-MIR5714_mi0019325_Brassica                               | RF00017;Metazoa_SRP;ABQO011127683.1/871-570      | 80.95 | 42  | 86  | 127 |
| bra-MIR5718_mi0019330_Brassica                               | RF00017;Metazoa_SRP;AADC01146307.1/37184-36893   | 76.27 | 59  | 3   | 60  |
| bra-MIR5719_mi0019331_Brassica                               | Helitron-2_Mad#Helitron#Malus                    | 81.82 | 44  | 30  | 73  |



|                                                                 |                                               |       |     |     |     |
|-----------------------------------------------------------------|-----------------------------------------------|-------|-----|-----|-----|
| bra-MIR5721_mi0019333_Brassica                                  | Ginger2-1_AP#Ginger2/TDD#Acyrtosiphon         | 76.92 | 52  | 100 | 151 |
| tur-mir-5736b_mi0019385_Tetranychus_urticae_miR-5736b_stem-loop | RF00100;7SK;AGTP01128439.1/12467-12188        | 78    | 50  | 52  | 100 |
| tur-mir-5738_mi0019405_Tetranychus_urticae_miR-5738_stem-loop   | Ginger1-1_AP#Ginger1#Acyrtosiphon             | 81.82 | 44  | 45  | 87  |
| bta-mir-574_mi0021122_Bos                                       | RF00026;U6;AFTD01127534.1/38140-38008         | 87.5  | 40  | 22  | 61  |
| ggo-mir-574_mi0020709_Gorilla                                   | Novosib-6_CR#Novosib#Chlamydomonas            | 85    | 40  | 20  | 59  |
| mtr-MIR5741a_mi0019663_Medicago                                 | MuDRASH3_MT#MuDR#Medicago                     | 83.33 | 42  | 12  | 53  |
| mtr-MIR5741c_mi0019684_Medicago                                 | MuDRASH3_MT#MuDR#Medicago                     | 75.93 | 54  | 11  | 61  |
| mtr-MIR5741d_mi0019692_Medicago                                 | MuDRASH3_MT#MuDR#Medicago                     | 72.09 | 86  | 134 | 213 |
| mtr-MIR5741e_mi0019700_Medicago                                 | MuDRASH3_MT#MuDR#Medicago                     | 80.36 | 56  | 183 | 236 |
| mtr-MIR5742_mi0019665_Medicago                                  | EnSpm-1_AA#DNA                                | 86.05 | 43  | 62  | 103 |
| mtr-MIR5744_mi0019669_Medicago                                  | GYP SHAN_I_MT#Gypsy#Medicago                  | 88.75 | 80  | 11  | 89  |
| mtr-MIR5747_mi0019672_Medicago                                  | RF00028;Intron_gpl;DQ026615.1/1-335           | 80    | 40  | 3   | 39  |
| mtr-MIR5748_mi0019673_Medicago                                  | RF00420;SNORA61;AAIY01100736.1/1057-1178      | 75.47 | 53  | 1   | 51  |
| mtr-MIR5750_mi0019675_Medicago                                  | CR1-73_HM#CR1#Hydra                           | 76.47 | 51  | 18  | 65  |
| mtr-MIR5751_mi0019676_Medicago                                  | MUMETRAV#MuDR#Medicago                        | 80    | 40  | 189 | 228 |
| mtr-MIR5752a_mi0019678_Medicago                                 | MUDSOLD1#MuDR#Solanum                         | 72.41 | 58  | 38  | 95  |
| mtr-MIR5752b_mi0019679_Medicago                                 | MUDSOLD1#MuDR#Solanum                         | 72.41 | 58  | 38  | 95  |
| mtr-MIR5753_mi0019680_Medicago                                  | RF00028;Intron_gpl;JN001439.1/1-383           | 80    | 40  | 46  | 85  |
| mtr-MIR5758_mi0019689_Medicago                                  | EnSpm-6_VV#EnSpm#Vitis                        | 80.49 | 41  | 134 | 173 |
| gma-MIR5764_mi0019706_Glycine                                   | GmOgre_I#Gypsy#Glycine                        | 85.11 | 94  | 52  | 145 |
| gma-MIR5771_mi0019716_Glycine                                   | GmCOPIA10_LTR#Copia#Glycine                   | 87.93 | 58  | 24  | 81  |
| gma-MIR5773_mi0019720_Glycine                                   | L1MED_5#LINE1                                 | 83.33 | 42  | 125 | 166 |
| gma-MIR5784_mi0019735_Glycine                                   | RF00100;7SK;ACBE01340887.1/217-503            | 80    | 45  | 38  | 80  |
| osa-MIR5790_mi0019802_Oryza                                     | GYP SY-A#Gypsy#Oryza                          | 89.87 | 79  | 5   | 83  |
| osa-MIR5795_mi0019808_Oryza                                     | ENSPM2_OS#ENSPM2_OS#Oryza                     | 98.6  | 215 | 5   | 219 |
| osa-MIR5804_mi0019820_Oryza                                     | L1-3_CR#L1#Chlamydomonas                      | 82.5  | 40  | 14  | 51  |
| osa-MIR5812_mi0019829_Oryza                                     | RF00001;5S_rRNA;AEYP01065049.1/14612-14495    | 80    | 45  | 14  | 58  |
| osa-MIR5816_mi0019833_Oryza                                     | SEVERIN-2#Helitron#Oryza                      | 93.02 | 43  | 39  | 81  |
| cgr-mir-582_mi0020541_Cricetulus                                | L3#Repetitive                                 | 82.93 | 41  | 8   | 48  |
| ssc-mir-582_mi0022154_Sus_scrofa_miR-582_stem-loop              | L3#CR1#Homo                                   | 80.49 | 41  | 5   | 45  |
| osa-MIR5824_mi0019842_Oryza                                     | CANDY STRIPE1#EnSpm#Sorghum                   | 73.19 | 138 | 34  | 170 |
| osa-MIR5825_mi0019844_Oryza                                     | CR1-14_HM#CR1#Hydra                           | 81.82 | 44  | 124 | 164 |
| osa-MIR5826_mi0019845_Oryza                                     | HAT-N12_Mad#hAT#Malus                         | 77.94 | 68  | 84  | 147 |
| osa-MIR5830_mi0019849_Oryza                                     | RF00017;Metazoa_SRP;AACZ03067153.1/424-136    | 80.43 | 46  | 52  | 96  |
| osa-MIR5831_mi0019850_Oryza                                     | GOLEM#DNA                                     | 76.56 | 64  | 8   | 70  |
| osa-MIR5835_mi0019855_Oryza                                     | COP_I_MT#Copia#Medicago                       | 78.43 | 51  | 80  | 128 |
| ggo-mir-584_mi0020674_Gorilla                                   | RF00100;7SK;AAGU03033404.1/31543-31857        | 76.47 | 51  | 6   | 56  |
| bma-mir-5854_mi0023452_Brugia                                   | RF00023;tmRNA;BA000021.3/122211-122575        | 80.43 | 46  | 12  | 57  |
| bma-mir-5855_mi0023453_Brugia                                   | RF00028;Intron_gpl;DQ176713.1/9-310           | 80    | 40  | 17  | 56  |
| bma-mir-5876_mi0023485_Brugia                                   | MuDR1_TP#MuDR#Thalassiosira                   | 80.49 | 41  | 1   | 41  |
| hco-mir-5925_mi0020075_Haemonchus                               | RF00029;Intron_gpl;ACYM01050099.1/58740-58679 | 76    | 50  | 14  | 63  |

|                                                                         |                                                     |       |     |     |     |
|-------------------------------------------------------------------------|-----------------------------------------------------|-------|-----|-----|-----|
| hco-mir-5940_mi0020104_Haemonchus                                       | Ovis_aries_chr22.trna562-GlyCCC                     | 82.93 | 41  | 48  | 87  |
| hco-mir-5960_mi0020132_Haemonchus                                       | RF01656;ceN72-3_ceN74-2;ABEG02001764.1/101374-10145 | 86.57 | 67  | 27  | 92  |
| hco-mir-5972_mi0020147_Haemonchus                                       | RF00028;Intron_gpl;HQ687204.1/3870-4408             | 88.14 | 59  | 46  | 104 |
| hco-mir-5973_mi0020148_Haemonchus                                       | contortus                                           | 71.43 | 98  | 1   | 98  |
| hco-mir-5978_mi0020156_Haemonchus                                       | RF01607;ceN100;AM051045.1/1-130                     | 80    | 55  | 65  | 118 |
| hco-mir-5991_mi0020169_Haemonchus                                       | Copia2-I_Dpse#Copia#Drosophila                      | 80    | 40  | 1   | 40  |
| spu-mir-5993_mi0020186_Strongylocentrotus_purpuratus_miR-5993_stem-loop | DIRS-5_SP#DIRS#Strongylocentrotus                   | 88.1  | 42  | 1   | 42  |
| spu-mir-5994_mi0020187_Strongylocentrotus_purpuratus_miR-5994_stem-loop | Gypsy-10_DPer-I#Gypsy#Drosophila                    | 77.78 | 63  | 27  | 87  |
| ath-MIR5999_mi0020196_Arabidopsis                                       | RF00261;IRES_L-myc;ABRM01031969.1/8513-8312         | 73.33 | 75  | 47  | 121 |
| tca-mir-6007_mi0020218_Tribolium_castaneum_miR-6007_stem-loop           | MUDR4_CB#MuDR#Caenorhabditis                        | 80    | 40  | 10  | 49  |
| tca-mir-6010_mi0020221_Tribolium_castaneum_miR-6010_stem-loop           | hAT-9N1_XT                                          | 75    | 56  | 2   | 56  |
| tca-mir-6014_mi0020225_Tribolium_castaneum_miR-6014_stem-loop           | Copia-19_GM-I#Copia#Glycine                         | 82.5  | 40  | 5   | 44  |
| tca-mir-6018_mi0020229_Tribolium_castaneum_miR-6018_stem-loop           | STALKER2_I#LTR                                      | 78    | 50  | 39  | 87  |
| stu-MIR6024_mi0020241_Solanum_tuberosum_miR6024_stem-loop               | Mariner1_AG#Mariner/Tc1#Anopheles                   | 80    | 40  | 60  | 99  |
| nta-MIR6025e_mi0021423_Nicotiana                                        | RF00004;U2;AAWZ02023896.1/36044-36243               | 100   | 45  | 85  | 129 |
| sly-MIR6026_mi0020257_Solanum_lycopersicum_miR6026_stem-loop            | piggyBac-2_XT#piggyBac#Xenopus                      | 77.36 | 53  | 66  | 116 |
| stu-MIR6026_mi0020256_Solanum_tuberosum_miR6026_stem-loop               | Mariner-5_PGr#Mariner/Tc1#Puccinia                  | 83.72 | 43  | 100 | 142 |
| sly-MIR6027_mi0020258_Solanum_lycopersicum_miR6027_stem-loop            | Gypsy48-I_DR#Gypsy#Danio                            | 74.55 | 55  | 63  | 117 |
| ame-mir-6041_mi0020310_Apis                                             | Crypton-1_NVi#Crypton#Nasonia                       | 80    | 50  | 3   | 51  |
| ame-mir-6044_mi0020313_Apis                                             | Loxodonta_africana_scaffold_34.trna610-CysGCA       | 80.49 | 41  | 35  | 75  |
| ame-mir-6045_mi0020314_Apis                                             | CR1-K4_Tgu#CR1#Estrildidae                          | 80.95 | 42  | 36  | 76  |
| ame-mir-6052_mi0020323_Apis                                             | RF00023;tmRNA;AACY020200952.1/2576-2178             | 77.36 | 53  | 19  | 70  |
| ame-mir-6058_mi0020329_Apis                                             | L1-44_XT#L1#Xenopus                                 | 80.49 | 41  | 26  | 65  |
| hsa-mir-6069_mi0020346_Homo_sapiens_miR-6069_stem-loop                  | RF00009;RNaseP_nuc;AFSB01181511.1/3070-3356         | 80.95 | 42  | 31  | 71  |
| hsa-mir-6070_mi0020347_Homo_sapiens_miR-6070_stem-loop                  | Copia-33_BG-I#Copia#Blumeria                        | 80    | 40  | 43  | 81  |
| hsa-mir-6076_mi0020353_Homo_sapiens_miR-6076_stem-loop                  | RF00409;SNORA7;AAPN01147135.1/2294-2427             | 80    | 40  | 31  | 69  |
| hsa-mir-6087_mi0020364_Homo_sapiens_miR-6087_stem-loop                  | LSU-rRNA_Hsa#rRNA#Metazoa                           | 97.96 | 49  | 1   | 49  |
| hsa-mir-6089-1_mi0020366_Homo_sapiens_miR-6089-1_stem-loop              | RF00174;Cobalamin;AACY020293185.1/2643-2415         | 72.73 | 55  | 2   | 56  |
| hsa-mir-6089-2_mi0023563_Homo_sapiens_miR-6089-2_stem-loop              | RF00174;Cobalamin;AACY020293185.1/2643-2415         | 72.73 | 55  | 2   | 56  |
| hsa-mir-6090_mi0020367_Homo_sapiens_miR-6090_stem-loop                  | RF00311;snoZ188;AC078839.4/159694-159817            | 80.49 | 41  | 1   | 40  |
| mse-mir-6101_mi0021063_Manduca                                          | RF00100;7SK;ABRO01062249.1/286-10                   | 80.36 | 56  | 15  | 69  |
| bta-mir-6122_mi0021140_Bos                                              | RF00409;SNORA7;AAPN01319385.1/16905-16769           | 75    | 56  | 3   | 58  |
| hsa-mir-6125_mi0021259_Homo_sapiens_miR-6125_stem-loop                  | Gypsy-33_SB-I#Gypsy#Sorghum                         | 82.5  | 40  | 7   | 45  |
| hsa-mir-6127_mi0021271_Homo_sapiens_miR-6127_stem-loop                  | En/Spm2_TM#DNA                                      | 78    | 50  | 61  | 109 |
| mml-mir-6127_mi0021280_Macaca                                           | MIR3#SINE#Mammalia                                  | 75.93 | 54  | 2   | 55  |
| ptr-mir-6127_mi0021261_Pan_troglodytes_miR-6127_stem-loop               | MIR3_MarsB#SINE2/trRNA#Metatheria                   | 74.65 | 71  | 12  | 82  |
| hsa-mir-6129_mi0021274_Homo_sapiens_miR-6129_stem-loop                  | RMER13B#ERV2#Muridae                                | 80    | 40  | 23  | 62  |
| ptr-mir-6129_mi0021264_Pan_troglodytes_miR-6129_stem-loop               | RMER13B#ERV2#Muridae                                | 80    | 40  | 23  | 62  |
| hsa-mir-6130_mi0021275_Homo_sapiens_miR-6130_stem-loop                  | L1MA8#Repetitive                                    | 75.45 | 110 | 1   | 109 |
| mml-mir-6130_mi0021284_Macaca                                           | L1MA8#Repetitive                                    | 77.27 | 110 | 1   | 109 |
| ptr-mir-6130_mi0021265_Pan_troglodytes_miR-6130_stem-loop               | L1MA8#Repetitive                                    | 76.36 | 110 | 1   | 109 |

|                                                           |                                                        |       |     |     |     |
|-----------------------------------------------------------|--------------------------------------------------------|-------|-----|-----|-----|
| mml-mir-6133_mi0021287_Macaca                             | RF00100;7SK;CABD02307382.1/4797-5119                   | 82.61 | 46  | 33  | 77  |
| nta-MIR6150_mi0021431_Nicotiana                           | Gypsy-28_Mad-LTR#Gypsy#Malus                           | 70.51 | 78  | 6   | 80  |
| nta-MIR6153_mi0021444_Nicotiana                           | Ogre-LE1_LTR#Gypsy#Solanum                             | 80    | 50  | 38  | 85  |
| nta-MIR6163_mi0021469_Nicotiana                           | TONT1_LE_I#LTR                                         | 82.86 | 70  | 10  | 79  |
| nta-MIR6164a_mi0021470_Nicotiana                          | SONATA2#DNA                                            | 81.67 | 60  | 34  | 93  |
| nta-MIR6164b_mi0021471_Nicotiana                          | SONATA2#DNA                                            | 83.05 | 59  | 39  | 97  |
| hbr-MIR6170_mi0021479_Hevea                               | RF00028;Intron_gpl;AM266987.1/554-1026                 | 83.33 | 42  | 29  | 67  |
| hbr-MIR6172_mi0021482_Hevea                               | RF00017;Metazoa_SRP;AADC01146307.1/37184-36893         | 80.43 | 46  | 44  | 87  |
| hbr-MIR6173_mi0021483_Hevea                               | RF01959;SSU_rRNA_archaea;AF166114.1/117516-116014      | 96.88 | 64  | 37  | 100 |
| hvu-MIR6177_mi0021490_Hordeum                             | LTR-1_Mad#Gypsy#Malus                                  | 80.95 | 42  | 181 | 221 |
| hvu-MIR6184_mi0021498_Hordeum                             | RF00230;T-box;ADGX01000193.1/8219-8125                 | 74.19 | 62  | 34  | 95  |
| hvu-MIR6186_mi0021500_Hordeum                             | TUBE2#SINE#Tupaia                                      | 76.92 | 52  | 5   | 56  |
| hvu-MIR6193_mi0021509_Hordeum                             | Legionella_pneumophila_Philadelphia_1_chr.trna7-GlyCCC | 80    | 40  | 50  | 89  |
| hvu-MIR6213_mi0021531_Hordeum                             | RF02252;Six3os1_7;AEYP01032992.1/856-1056              | 80    | 40  | 60  | 99  |
| hvu-MIR6214_mi0021532_Hordeum                             | TguLTRK1_I#ERV2#Estrilidae                             | 81.4  | 43  | 59  | 101 |
| sbi-MIR6217a_mi0023508_Sorghum_bicolor_miR6217a_stem-loop | DNA-3_SBi#DNA                                          | 90.38 | 52  | 1   | 52  |
| sbi-MIR6217b_mi0023509_Sorghum_bicolor_miR6217b_stem-loop | DNA-3_SBi#DNA                                          | 95.07 | 223 | 3   | 224 |
| sbi-MIR6218_mi0023510_Sorghum_bicolor_miR6218_stem-loop   | EnSpm-10_ZM#EnSpm#Zea                                  | 81.18 | 85  | 36  | 120 |
| sbi-MIR6219_mi0023514_Sorghum_bicolor_miR6219_stem-loop   | En/Spm2_TM#DNA                                         | 78.57 | 70  | 59  | 126 |
| sbi-MIR6220_mi0023515_Sorghum_bicolor_miR6220_stem-loop   | STOWAWAY13_SB#DNA                                      | 84.34 | 83  | 192 | 274 |
| sbi-MIR6222_mi0023518_Sorghum_bicolor_miR6222_stem-loop   | HARB-N31_SBi#Harbinger#Sorghum                         | 86.54 | 52  | 42  | 93  |
| sbi-MIR6224a_mi0023520_Sorghum_bicolor_miR6224a_stem-loop | STOWAWAY22_SB#DNA                                      | 93.1  | 174 | 2   | 175 |
| sbi-MIR6224b_mi0023521_Sorghum_bicolor_miR6224b_stem-loop | STOWAWAY22_SB#DNA                                      | 90.7  | 43  | 127 | 169 |
| sbi-MIR6224c_mi0023522_Sorghum_bicolor_miR6224c_stem-loop | STOWAWAY22_SB#DNA                                      | 89.2  | 176 | 26  | 198 |
| sbi-MIR6225_mi0023523_Sorghum_bicolor_miR6225_stem-loop   | TSB1#Harbinger#Sorghum                                 | 87.86 | 140 | 2   | 141 |
| sbi-MIR6227_mi0023527_Sorghum_bicolor_miR6227_stem-loop   | DNA-3-2N_SBi#DNA                                       | 91.1  | 146 | 9   | 154 |
| sbi-MIR6228_mi0023529_Sorghum_bicolor_miR6228_stem-loop   | HARB-N2_SB#Harbinger#Sorghum                           | 79.49 | 78  | 3   | 78  |
| sbi-MIR6229_mi0023530_Sorghum_bicolor_miR6229_stem-loop   | LINE1-18_SBi#L1#Sorghum                                | 85.14 | 74  | 12  | 84  |
| sbi-MIR6230_mi0023531_Sorghum_bicolor_miR6230_stem-loop   | CLOUD-7#DNA                                            | 87.5  | 40  | 135 | 174 |
| sbi-MIR6232a_mi0023535_Sorghum_bicolor_miR6232a_stem-loop | STOWAWAY41_OS#DNA                                      | 90.24 | 41  | 122 | 162 |
| sbi-MIR6232b_mi0023536_Sorghum_bicolor_miR6232b_stem-loop | STOWAWAY41_OS#DNA                                      | 84.09 | 44  | 119 | 162 |
| sbi-MIR6233_mi0023537_Sorghum_bicolor_miR6233_stem-loop   | RLG_scAle_1_1-I#Copia#Saccharum                        | 87.01 | 77  | 9   | 85  |
| mmu-mir-6236_mi0021583_Mus                                | LSU-rRNA_Cel                                           | 100   | 45  | 1   | 45  |
| mmu-mir-6240_mi0021587_Mus                                | LSU-rRNA_Dme                                           | 93.1  | 58  | 49  | 106 |
| mmu-mir-6243_mi0021590_Mus                                | LSU-rRNA_Hca                                           | 97.56 | 41  | 28  | 68  |
| osa-MIR6253_mi0021603_Oryza                               | RF01431;snoR135;ADWL01014774.1/5887-5823               | 100   | 65  | 4   | 68  |
| osa-MIR6254_mi0021604_Oryza                               | Harbinger-3_VV#Harbinger#Vitis                         | 75    | 56  | 81  | 136 |
| osa-MIR6255_mi0021605_Oryza                               | RF01431;snoR135;AP006458.4/148991-148843               | 100   | 80  | 1   | 80  |
| gma-MIR6299_mi0021723_Glycine                             | P1_AP#P#Acyrtosiphon                                   | 76.92 | 65  | 29  | 85  |
| gma-MIR6300_mi0021724_Glycine                             | RF00028;Intron_gpl;EF562517.1/5-278                    | 75.41 | 61  | 55  | 115 |
| hme-mir-6303_mi0021805_Heliconius                         | Rehavkus-1_CS#Rehavkus#Ciona                           | 83.33 | 42  | 36  | 75  |

|                                |                                                |       |     |     |     |
|--------------------------------|------------------------------------------------|-------|-----|-----|-----|
| rno-mir-6320_mi0021843_Rattus  | RF00004;U2;AFSB01110994.1/3839-4007            | 95.45 | 44  | 72  | 115 |
| rno-mir-6330_mi0021854_Rattus  | L1MA5#Repetitive                               | 80.95 | 42  | 56  | 97  |
| mmu-mir-6344_mi0021872_Mus     | VANDAL10#MuDR#Arabidopsis                      | 80    | 40  | 23  | 62  |
| mmu-mir-6347_mi0021875_Mus     | MER5A#Repetitive                               | 72.55 | 51  | 28  | 78  |
| mmu-mir-6363_mi0021892_Mus     | SINEB1_MU#SINE#Meriones                        | 74.58 | 59  | 56  | 114 |
| mmu-mir-6364_mi0021893_Mus     | B4_ROD                                         | 83.56 | 73  | 6   | 77  |
| mmu-mir-6373_mi0021902_Mus     | RF01167;sn2429;ABLE03025213.1/3758-3682        | 75    | 52  | 4   | 54  |
| mmu-mir-6374_mi0021903_Mus     | RF00017;Metazoa_SRP;ABDC01131008.1/89-393      | 85    | 40  | 41  | 80  |
| mmu-mir-6377_mi0021907_Mus     | L1MA9#Repetitive                               | 76.47 | 68  | 3   | 69  |
| mmu-mir-6380_mi0021911_Mus     | B3#SINE#Rodentia                               | 72.5  | 80  | 11  | 81  |
| mmu-mir-6398_mi0021934_Mus     | RF00026;U6;ABDC01182048.1/910-820              | 74.58 | 59  | 9   | 62  |
| mmu-mir-6412_mi0021949_Mus     | STRIDE1#SINE1/7SL#Ictidomys                    | 76.81 | 69  | 23  | 90  |
| mmu-mir-6414_mi0021952_Mus     | RF02035;IMES-2;AACY021636922.1/521-381         | 75.47 | 53  | 7   | 56  |
| mmu-mir-6417_mi0021955_Mus     | HAT-10_Mad#hAT#Malus                           | 76.47 | 51  | 49  | 99  |
| mmu-mir-6418_mi0021956_Mus     | Copia-63_VV-I#Copia#Vitis                      | 81.4  | 43  | 33  | 72  |
| mmu-mir-6419_mi0021957_Mus     | RF00560;SNORA17;AABR05113090.1/65198-65328     | 74.55 | 55  | 60  | 111 |
| ptc-MIR6423_mi0022024_Populus  | Gypsy-9_DPu-I#Gypsy#Daphnia                    | 76.25 | 80  | 78  | 151 |
| ptc-MIR6425a_mi0021970_Populus | MacERV4_int#ERV2#Cercopithecidae               | 80.95 | 42  | 120 | 160 |
| ptc-MIR6426a_mi0021995_Populus | DNA-3-2B_PTr#DNA                               | 90.38 | 52  | 29  | 80  |
| ptc-MIR6426b_mi0022031_Populus | DNA-3-2B_PTr#DNA                               | 81.97 | 61  | 36  | 96  |
| ptc-MIR6432_mi0022006_Populus  | Gypsy-26_PTr-LTR#Gypsy#Populus                 | 71.56 | 109 | 2   | 101 |
| ptc-MIR6437a_mi0022012_Populus | Ogre-PT2_LTR#Gypsy#Populus                     | 87.8  | 41  | 22  | 62  |
| ptc-MIR6437b_mi0021999_Populus | Ogre-PT2_LTR#Gypsy#Populus                     | 87.8  | 41  | 22  | 62  |
| ptc-MIR6438b_mi0021975_Populus | RF00001;5S_rRNA;ABRP01129000.1/726-601         | 80    | 40  | 184 | 223 |
| ptc-MIR6439b_mi0022030_Populus | RF01998;group-II-D1D4-1;AGBG01000046.1/279-374 | 80    | 40  | 175 | 213 |
| ptc-MIR6440c_mi0021977_Populus | BEL-1-I_XT#BEL#Xenopus                         | 75    | 56  | 5   | 57  |
| ptc-MIR6443_mi0022018_Populus  | hAT-72_HM#hAT#Hydra                            | 82.93 | 41  | 1   | 41  |
| ptc-MIR6444_mi0022019_Populus  | CR1-9_HM#CR1#Hydra                             | 80.85 | 47  | 60  | 105 |
| ptc-MIR6445a_mi0022020_Populus | L1-4_LA#L1#Loxodonta                           | 80.49 | 41  | 57  | 97  |
| ptc-MIR6452_mi0022034_Populus  | RF01417;RSV_RNA;AL645923.14/81871-81598        | 75    | 56  | 49  | 104 |
| ptc-MIR6454_mi0022036_Populus  | RF01855;Plant_SRP;AARH01024914.1/1674-1372     | 85.11 | 47  | 2   | 48  |
| ptc-MIR6455_mi0022037_Populus  | L1-24_ACar#L1#Anolis                           | 80.95 | 42  | 132 | 171 |
| ptc-MIR6460_mi0021966_Populus  | RF00409;SNORA7;AAPN01435063.1/4265-4130        | 80.49 | 41  | 7   | 47  |
| ptc-MIR6462a_mi0021968_Populus | RF01291;SNORD97;AGAI01045456.1/65326-65169     | 80    | 40  | 33  | 71  |
| ptc-MIR6464_mi0021971_Populus  | MuDR-11N_VV#MuDR#Vitis                         | 83.33 | 42  | 43  | 82  |
| ptc-MIR6465_mi0021972_Populus  | RF00028;Intron_gpl;AF215904.1/10-318           | 84.44 | 45  | 38  | 82  |
| ptc-MIR6466_mi0021973_Populus  | RF00028;Intron_gpl;AJ409374.1/1-427            | 73.91 | 69  | 32  | 96  |
| ptc-MIR6470_mi0021984_Populus  | DNA4-3_AP#DNA                                  | 75.93 | 54  | 36  | 88  |
| ptc-MIR6472_mi0021986_Populus  | COPIA4-I_AG#Copia#Anopheles                    | 80.43 | 46  | 19  | 63  |
| ptc-MIR6473_mi0021987_Populus  | MER57I#Internal                                | 80    | 40  | 6   | 45  |
| ptc-MIR6476_mi0021991_Populus  | RF00425;SNORA18;ABRR01391506.1/3912-4041       | 80.49 | 41  | 36  | 75  |

|                                                        |                                                   |       |     |    |     |
|--------------------------------------------------------|---------------------------------------------------|-------|-----|----|-----|
| ptc-MIR6478_mi0021994_Populus                          | Populus_trichocarpa_scaffold_15.trna5-IleGAT      | 80    | 70  | 3  | 65  |
| hbr-MIR6483_mi0022062_Hevea                            | RF00015;U4;AAQR03096661.1/48687-48564             | 80.49 | 41  | 5  | 45  |
| mja-mir-6490_mi0022067_Marsupenaeus                    | LSU-rRNA_Ath                                      | 87.65 | 81  | 34 | 114 |
| mja-mir-6491_mi0022068_Marsupenaeus                    | LSU-rRNA_Hca                                      | 82.93 | 41  | 1  | 41  |
| mja-mir-6492_mi0022069_Marsupenaeus                    | LSU-rRNA_Cel                                      | 72.13 | 61  | 35 | 95  |
| mja-mir-6494_mi0022071_Marsupenaeus                    | LSU-rRNA_Dme                                      | 72.73 | 77  | 1  | 77  |
| bmo-mir-6496_mi0022086_Bombyx                          | LSU-rRNA_Dme                                      | 73.33 | 75  | 1  | 75  |
| bmo-mir-6497_mi0022087_Bombyx                          | LSU-rRNA_Ath                                      | 90.48 | 42  | 1  | 42  |
| hsa-mir-6500_mi0022211_Homo_sapiens_miR-6500_stem-loop | MER52#Repetitive                                  | 87.5  | 80  | 1  | 79  |
| hsa-mir-6503_mi0022215_Homo_sapiens_miR-6503_stem-loop | RF00100;7SK;CABD02255103.1/1372-1181              | 73.33 | 60  | 26 | 84  |
| hsa-mir-6507_mi0022219_Homo_sapiens_miR-6507_stem-loop | L1M3_5#L1                                         | 81.82 | 44  | 1  | 43  |
| hsa-mir-6514_mi0022226_Homo_sapiens_miR-6514_stem-loop | SZ-39LTR#Gypsy#Oryza                              | 75.44 | 57  | 1  | 54  |
| gga-mir-6516_mi0022520_Gallus                          | RF00424;SCARNA16;ADDD01135090.1/7641-7810         | 100   | 89  | 1  | 89  |
| bta-mir-652_mi0021123_Bos                              | MER91C#DNA                                        | 82.8  | 93  | 12 | 98  |
| cgr-mir-652_mi0020546_Cricetulus                       | MER91C#DNA                                        | 82.35 | 85  | 2  | 80  |
| ggo-mir-652_mi0020700_Gorilla                          | MER91B#Non-autonomous                             | 90.48 | 42  | 69 | 109 |
| ssc-mir-652_mi0015919_Sus_scrofa_miR-652_stem-loop     | MER91C#hAT#Homo                                   | 83.91 | 87  | 3  | 83  |
| bta-mir-6522_mi0022287_Bos                             | ATENSPM1#EnSpm#Arabidopsis                        | 80.49 | 41  | 34 | 70  |
| gga-mir-6543_mi0022539_Gallus                          | CR1-J1_Pass#CR1#Passeriformes                     | 78.18 | 110 | 1  | 108 |
| gga-mir-6548_mi0022365_Gallus                          | Charlie-Galluhop#Charlie-Galluhop#Gallus          | 76.19 | 105 | 6  | 107 |
| gga-mir-6552_mi0022370_Gallus                          | CR1-Y4#CR1#Gallus                                 | 96.36 | 55  | 1  | 55  |
| gga-mir-6555_mi0022374_Gallus                          | CR1-Y3#CR1#Gallus                                 | 87    | 100 | 1  | 100 |
| gga-mir-6561_mi0022379_Gallus                          | CR1-Y#CR1#Gallus                                  | 84.31 | 102 | 1  | 102 |
| gga-mir-6595_mi0022415_Gallus                          | RF00028;Intron_gpl;AF303672.1/2-490               | 80.95 | 42  | 35 | 76  |
| gga-mir-6603_mi0022422_Gallus                          | CR1-D2#CR1#Gallus                                 | 95.65 | 46  | 63 | 108 |
| gga-mir-6634_mi0022453_Gallus                          | CR1POL#LINE#Gallus                                | 94.03 | 67  | 29 | 95  |
| cgr-mir-664_mi0020548_Cricetulus                       | RF00340;SNORA36;AFTD01019827.1/36092-36223        | 100   | 73  | 1  | 73  |
| gga-mir-6642_mi0022461_Gallus                          | TguLTRK1_I#ERV2#Estrildidae                       | 78.85 | 52  | 29 | 80  |
| gga-mir-6646-1_mi0022464_Gallus                        | Zepp#L1#Chlorella                                 | 80.95 | 42  | 31 | 72  |
| gga-mir-6646-2_mi0023554_Gallus                        | Zepp#L1#Chlorella                                 | 80.95 | 42  | 31 | 72  |
| hsa-mir-664b_mi0019134_Homo_sapiens_miR-664b_stem-loop | RF00340;SNORA36;CABD02303500.1/3133-3012          | 98.36 | 61  | 1  | 61  |
| gga-mir-6651_mi0022470_Gallus                          | RF00017;Metazoa_SRP;AADN03000502.1/167900-167612  | 93.1  | 87  | 13 | 98  |
| gga-mir-6668_mi0022488_Gallus                          | CR1-F2#CR1#Gallus                                 | 92.31 | 52  | 1  | 52  |
| gga-mir-6669_mi0022489_Gallus                          | RF01959;SSU_rRNA_archaea;AE009439.1/518289-516780 | 81.4  | 43  | 16 | 57  |
| gga-mir-6672_mi0022492_Gallus                          | CR1-Y4#CR1#Gallus                                 | 89.66 | 58  | 29 | 86  |
| gga-mir-6676_mi0022496_Gallus                          | NonLTR-5_CR#Non-LTR                               | 80.43 | 46  | 9  | 53  |
| gga-mir-6678_mi0022498_Gallus                          | CR1_F#CR1#Gallus                                  | 85.42 | 48  | 56 | 103 |
| gga-mir-6680_mi0022500_Gallus                          | CR1-Y#CR1#Gallus                                  | 77.01 | 87  | 18 | 102 |
| gga-mir-6688_mi0022509_Gallus                          | Birddawg_I#Gypsy#Gallus                           | 87.5  | 56  | 27 | 82  |
| gga-mir-6691-1_mi0022512_Gallus                        | R7Ag2#Non-LTR                                     | 80.7  | 57  | 13 | 67  |
| gga-mir-6691-2_mi0023556_Gallus                        | R7Ag2#Non-LTR                                     | 80.7  | 57  | 13 | 67  |

|                                                                       |                                            |       |     |     |     |
|-----------------------------------------------------------------------|--------------------------------------------|-------|-----|-----|-----|
| gga-mir-6699_mi0022521_Gallus                                         | RF00004;U2;AAZ01525807.1/1498-1361         | 80    | 45  | 42  | 84  |
| mmu-mir-669a-10_mi0014073_Mus                                         | CR1-18_HM#CR1#Hydra                        | 82.5  | 40  | 40  | 78  |
| mmu-mir-669a-11_mi0014075_Mus                                         | CR1-18_HM#CR1#Hydra                        | 82.5  | 40  | 40  | 78  |
| mmu-mir-669a-12_mi0014077_Mus                                         | CR1-18_HM#CR1#Hydra                        | 82.5  | 40  | 40  | 78  |
| mmu-mir-669a-4_mi0014054_Mus                                          | CR1-18_HM#CR1#Hydra                        | 82.5  | 40  | 40  | 78  |
| mmu-mir-669a-5_mi0014055_Mus                                          | CR1-18_HM#CR1#Hydra                        | 82.5  | 40  | 40  | 78  |
| mmu-mir-669a-6_mi0014058_Mus                                          | CR1-18_HM#CR1#Hydra                        | 82.5  | 40  | 40  | 78  |
| mmu-mir-669a-7_mi0014061_Mus                                          | CR1-18_HM#CR1#Hydra                        | 82.5  | 40  | 40  | 78  |
| mmu-mir-669a-8_mi0014066_Mus                                          | CR1-18_HM#CR1#Hydra                        | 82.5  | 40  | 40  | 78  |
| mmu-mir-669a-9_mi0014068_Mus                                          | CR1-18_HM#CR1#Hydra                        | 82.5  | 40  | 40  | 78  |
| mmu-mir-669d-2_mi0014051_Mus                                          | CR1-18_HM#CR1#Hydra                        | 78.33 | 60  | 27  | 86  |
| mmu-mir-669p-1_mi0014064_Mus                                          | TRAS3_BM#R1#Bombyx                         | 80.43 | 46  | 38  | 82  |
| mmu-mir-669p-2_mi0014071_Mus                                          | TRAS3_BM#R1#Bombyx                         | 80.43 | 46  | 38  | 82  |
| gga-mir-6700_mi0022522_Gallus                                         | CR1-F2#CR1#Gallus                          | 78.76 | 113 | 2   | 107 |
| gga-mir-6702_mi0022524_Gallus                                         | CR1-Y#CR1#Gallus                           | 94.92 | 59  | 52  | 110 |
| gga-mir-6706_mi0022528_Gallus                                         | Eri-2B_EE#SINE#Erinaceus                   | 81.4  | 43  | 40  | 81  |
| gga-mir-6707_mi0022529_Gallus                                         | CR1-Y4#CR1#Gallus                          | 85.71 | 49  | 21  | 69  |
| gga-mir-6708_mi0022530_Gallus                                         | LTR1420_EC#ERV1#Equus                      | 80.77 | 52  | 36  | 79  |
| hsa-mir-6720_mi0022555_Homo_sapiens_miR-6720_stem-loop                | Gypsy-2_PCR-I#Gypsy#Phanerochaete          | 74.07 | 81  | 22  | 94  |
| mdm-MIR7127a_mi0023168_Malus                                          | RF00001;5S_rRNA;ABGA01133257.1/15266-15147 | 82.93 | 41  | 48  | 85  |
| mdm-MIR7128_mi0023173_Malus                                           | RF00028;Intron_gpl;AJ238766.1/1-513        | 80.39 | 51  | 8   | 57  |
| sha-mir-716a_mi0019600_Sarcophilus_harrisii_miR-716a_stem-loop        | LSU-rRNA_Hca                               | 94.03 | 67  | 84  | 150 |
| sha-mir-716b_mi0019618_Sarcophilus_harrisii_miR-716b_stem-loop        | LSU-rRNA_Ath                               | 98.21 | 56  | 91  | 146 |
| ENSMMUG00000036288 mml-mir-762-1_[Source:miRBase;Acc:MI0012548] mml-n | NonLTR-5_CR#Non-LTR                        | 81.82 | 44  | 543 | 585 |
| osa-MIR812k_mi0017245_Oryza                                           | CR1-41_HM#CR1#Hydra                        | 79.25 | 53  | 113 | 164 |
| osa-MIR812l_mi0017246_Oryza                                           | TC4#DNA                                    | 85    | 40  | 66  | 105 |
| osa-MIR812m_mi0017247_Oryza                                           | CANDYSTRIFE1#EnSpm#Sorghum                 | 70.37 | 135 | 32  | 165 |
| osa-MIR812n_mi0017254_Oryza                                           | RF00028;Intron_gpl;HQ656752.1/1-507        | 80    | 55  | 37  | 90  |
| osa-MIR812o_mi0017255_Oryza                                           | SZ-55#Copia#Oryza                          | 75    | 76  | 76  | 145 |
| osa-MIR812p_mi0019799_Oryza                                           | Sola2-3_DPu#Sola#Daphnia                   | 85    | 40  | 124 | 163 |
| osa-MIR812q_mi0019800_Oryza                                           | ATREP11A#Helitron#Arabidopsis              | 76.47 | 68  | 66  | 125 |
| osa-MIR812r_mi0019807_Oryza                                           | Ogre-SD1_I#Gypsy#Solanum                   | 74.63 | 67  | 95  | 160 |
| osa-MIR812s_mi0019812_Oryza                                           | CR1-41_HM#CR1#Hydra                        | 81.63 | 49  | 39  | 84  |
| osa-MIR812t_mi0019817_Oryza                                           | hAT-N4_Mad#hAT#Malus                       | 82.22 | 45  | 115 | 158 |
| osa-MIR812u_mi0019818_Oryza                                           | Ogre-SD1_I#Gypsy#Solanum                   | 75.76 | 66  | 95  | 158 |
| osa-MIR812v_mi0019823_Oryza                                           | B2L_S#SINE#Sciurognathi                    | 80    | 60  | 36  | 95  |
| osa-MIR818f_mi0023432_Oryza                                           | MUDRAV12#MuDR#Vitis                        | 85    | 40  | 82  | 118 |
| asu-mir-81a_mi0018555_Ascaris                                         | RF00727;bantam;ACPB02031190.1/4252-4344    | 78.46 | 65  | 11  | 73  |
| mdm-MIR827_mi0023132_Malus                                            | MuDR1_HV#MuDR#Hordeum                      | 78.57 | 56  | 71  | 124 |
| aly-MIR828_mi0014606_Arabidopsis                                      | RF00230;T-box;AEOT01000009.1/28498-28745   | 83.33 | 42  | 37  | 77  |
| mdm-MIR828a_mi0023133_Malus                                           | EnSpm3_PT#EnSpm#Populus                    | 82.93 | 41  | 63  | 103 |

|                                                             |                                                 |         |          |         |     |
|-------------------------------------------------------------|-------------------------------------------------|---------|----------|---------|-----|
| mdm-MIR828b_mi0023134_Malus                                 | MuDR1_HV#MuDR#Hordeum                           | 80.39   | 51       | 50      | 100 |
| aly-MIR833_mi0014609_Arabidopsis                            | RF01417;RSV_RNA;AAQR03187536.1/17230-16939      | 82.5    | 40       | 4       | 42  |
| aly-MIR835_mi0014611_Arabidopsis                            | ENSPM2_VV#EnSpm#Vitis                           | 80      | 45       | 92      | 136 |
| aly-MIR837_mi0014644_Arabidopsis                            | Gypsy-71_PTr-LTR#Gypsy#Populus                  | 80.77   | 52       | 8       | 59  |
| aly-MIR844_mi0014616_Arabidopsis                            | RF00010;RNaseP_bact_a;AATR01000031.1/8560-8909  | 78.43   | 51       | 63      | 111 |
| cme-MIR854_mi0023204_Cucumis                                | Copia-10_Mad-l#Copia#Malus                      | 83.33   | 48       | 6       | 52  |
| aly-MIR857_mi0014623_Arabidopsis                            | ENSPM1_PT#EnSpm#Populus                         | 77.94   | 68       | 247     | 312 |
| aly-MIR858_mi0014624_Arabidopsis                            | L2-1a_Cis#CR1#Ciona                             | 80.77   | 52       | 730     | 780 |
| cme-MIR858_mi0023187_Cucumis                                | RF00028;Intron_gpl;HQ613695.1/7-286             | 76.92   | 65       | 40      | 104 |
| tca-mir-87b_mi0016332_Tribolium_castaneum_miR-87b_stem-loop | RF00017;Metazoa_SRP;AAKN02013252.1/27448-27757  | 72.13   | 61       | 37      | 97  |
| ggo-mir-885_mi0020661_Gorilla                               | RF00409;SNORA7;AAPN01232765.1/7684-7840         | 82.5    | 40       | 63      | 101 |
| sha-mir-9_mi0019609_Sarcophilus_harrisii_miR-9_stem-loop    | RF01417;RSV_RNA;ADDD01150879.1/578-865          | 78      | 50       | 68      | 116 |
| oan-mir-92d_mi0012556_Ornithorhynchus                       | RF00097;snoR71;AEMH01011343.1/8755-8861         | 80.49   | 41       | 1       | 41  |
| pde-MIR946_mi0022102_Pinus                                  | RF00409;SNORA7;AC160641.2/119674-119811         | 80      | 40       | 16      | 54  |
| ssl-MIR948_mi0019356_Salvia_sclarea_miR948_stem-loop        | ATLANTYS2_l#Gypsy#Arabidopsis                   | 80.95   | 42       | 16      | 56  |
| pde-MIR949b_mi0022105_Pinus                                 | Xanthobacter_autotrophicus_Py2_chr.trna6-AlaGGC | 80.49   | 41       | 13      | 53  |
| tca-mir-9e_mi0020231_Tribolium_castaneum_miR-9e_stem-loop   | L1-35_ACar#L1#Anolis                            | 80.43   | 46       | 5       | 49  |
|                                                             |                                                 |         |          |         |     |
|                                                             |                                                 | Average | 82.38744 | 56.9974 |     |
